# Supplementary material for: Leveraging transcriptomics-based approaches to enhance genomic prediction: integrating SNPs and gene networks for cotton fibre quality improvement
Source: Front Plant Sci. 2024 Sep 20;15:1420837. doi: 10.3389/fpls.2024.1420837 (PMC11450228; doi:10.3389/fpls.2024.1420837)
Supplement: Supplementary File 2 — CokerFibreDEgenes_SNPcoordinates. [file Table2.xlsx]

## Sheet: Important NOTE
This CSIRO DATA FILE is linked to the CSIRO DATA ACCESS PORTAL and has date-stamps

## Sheet: 07vs16_SNPs
comparison	ID	chromosome	location_coordinate	gene ID
exact_07vs16_upregulated_SNPs	i32187Gh	A03	4807137	Gohir.A03G030100
exact_07vs16_upregulated_SNPs	i39795Gh	A05	89260472	Gohir.A05G361000
exact_07vs16_upregulated_SNPs	i65892Ga	A06	57914	Gohir.A06G001200
exact_07vs16_upregulated_SNPs	i14223Gh	A06	3874026	Gohir.A06G031600
exact_07vs16_upregulated_SNPs	i27926Gh	A07	15090736	Gohir.A07G092100
exact_07vs16_upregulated_SNPs	i28878Gh	A08	6522533	Gohir.A08G049700
exact_07vs16_upregulated_SNPs	i27322Gh	A09	15689050	Gohir.A09G035000
exact_07vs16_upregulated_SNPs	i00903Gh	A09	72531111	Gohir.A09G151700
exact_07vs16_upregulated_SNPs	i27166Gh	A10	99007917	Gohir.A10G185200
exact_07vs16_upregulated_SNPs	i44707Gh	A10	99423286	Gohir.A10G186000
exact_07vs16_upregulated_SNPs	i42321Gh	A10	109671822	Gohir.A10G228300
exact_07vs16_upregulated_SNPs	i00397Gh	A11	13781670	Gohir.A11G124500
exact_07vs16_upregulated_SNPs	i34677Gh	A13	5721002	Gohir.A13G043900
exact_07vs16_upregulated_SNPs	i02431Gh	D01	8500604	Gohir.D01G059900
exact_07vs16_upregulated_SNPs	i14621Gh	D01	8500734	Gohir.D01G059900
exact_07vs16_upregulated_SNPs	i14622Gh	D01	8500821	Gohir.D01G059900
exact_07vs16_upregulated_SNPs	i33074Gh	D02	17800919	Gohir.D02G090200
exact_07vs16_upregulated_SNPs	i45229Gh	D02	55785164	Gohir.D02G150100
exact_07vs16_upregulated_SNPs	i05631Gh	D02	67049234	Gohir.D02G198100
exact_07vs16_upregulated_SNPs	i03540Gh	D03	48594155	Gohir.D03G144500
exact_07vs16_upregulated_SNPs	i03541Gh	D03	48594434	Gohir.D03G144500
exact_07vs16_upregulated_SNPs	i12834Gh	D04	52479961	Gohir.D04G157100
exact_07vs16_upregulated_SNPs	i16592Gh	D05	5319520	Gohir.D05G064100
exact_07vs16_upregulated_SNPs	i09073Gh	D05	5319880	Gohir.D05G064100
exact_07vs16_upregulated_SNPs	i09074Gh	D05	5320760	Gohir.D05G064100
exact_07vs16_upregulated_SNPs	i46063Gh	D05	6631162	Gohir.D05G079100
exact_07vs16_upregulated_SNPs	i09334Gh	D05	11704744	Gohir.D05G133600
exact_07vs16_upregulated_SNPs	i09472Gh	D05	13852394	Gohir.D05G155500
exact_07vs16_upregulated_SNPs	i64008Gm	D06	3193563	Gohir.D06G027600
exact_07vs16_upregulated_SNPs	i50575Gb	D06	3193592	Gohir.D06G027600
exact_07vs16_upregulated_SNPs	i53223Gb	D06	3193884	Gohir.D06G027600
exact_07vs16_upregulated_SNPs	i03798Gh	D08	1725458	Gohir.D08G020300
exact_07vs16_upregulated_SNPs	i03859Gh	D08	2865995	Gohir.D08G029600
exact_07vs16_upregulated_SNPs	i03948Gh	D08	5152998	Gohir.D08G049000
exact_07vs16_upregulated_SNPs	i15022Gh	D08	5153216	Gohir.D08G049000
exact_07vs16_upregulated_SNPs	i03949Gh	D08	5154046	Gohir.D08G049000
exact_07vs16_upregulated_SNPs	i03961Gh	D08	5413073	Gohir.D08G050700
exact_07vs16_upregulated_SNPs	i15823Gh	D09	49155358	Gohir.D09G199000
exact_07vs16_upregulated_SNPs	i42631Gh	D10	11142008	Gohir.D10G084600
exact_07vs16_upregulated_SNPs	i20067Gh	D10	27606654	Gohir.D10G137400
exact_07vs16_upregulated_SNPs	i22400Gh	D11	58160901	Gohir.D11G260600
exact_07vs16_upregulated_SNPs	i08482Gh	D12	56936654	Gohir.D12G208200
exact_07vs16_upregulated_SNPs	i14228Gh	D13	57759892	Gohir.D13G178700
exact_07vs16_downregulated_SNPs	i42053Gh	A03	9042776	Gohir.A03G047100
exact_07vs16_downregulated_SNPs	i05560Gh	A03	106813180	Gohir.A03G194300
exact_07vs16_downregulated_SNPs	i38872Gh	A09	15563988	Gohir.A09G034400
exact_07vs16_downregulated_SNPs	i43721Gh	D01	55930627	Gohir.D01G164700
exact_07vs16_downregulated_SNPs	i40746Gh	D01	57775543	Gohir.D01G174400
exact_07vs16_downregulated_SNPs	i15341Gh	D02	2671933	Gohir.D02G019900
exact_07vs16_downregulated_SNPs	i15343Gh	D02	2672284	Gohir.D02G019900
exact_07vs16_downregulated_SNPs	i15344Gh	D02	2672365	Gohir.D02G019900
exact_07vs16_downregulated_SNPs	i15345Gh	D02	2672461	Gohir.D02G019900
exact_07vs16_downregulated_SNPs	i04950Gh	D02	2672953	Gohir.D02G019900
exact_07vs16_downregulated_SNPs	i46831Gh	D03	4995675	Gohir.D03G038800
exact_07vs16_downregulated_SNPs	i20150Gh	D04	6616907	Gohir.D04G042100
exact_07vs16_downregulated_SNPs	i21841Gh	D05	1969553	Gohir.D05G021600
exact_07vs16_downregulated_SNPs	i08916Gh	D05	3343489	Gohir.D05G039300
exact_07vs16_downregulated_SNPs	i09428Gh	D05	13266239	Gohir.D05G149600
exact_07vs16_downregulated_SNPs	i16682Gh	D05	13268891	Gohir.D05G149600
exact_07vs16_downregulated_SNPs	i23937Gh	D05	18146257	Gohir.D05G201500
exact_07vs16_downregulated_SNPs	i10017Gh	D05	30743550	Gohir.D05G291000
exact_07vs16_downregulated_SNPs	i44921Gh	D05	37148976	Gohir.D05G309100
exact_07vs16_downregulated_SNPs	i10525Gh	D06	165211	Gohir.D06G002100
exact_07vs16_downregulated_SNPs	i19724Gh	D06	570700	Gohir.D06G005500
exact_07vs16_downregulated_SNPs	i17148Gh	D06	2430373	Gohir.D06G022400
exact_07vs16_downregulated_SNPs	i10846Gh	D06	7141625	Gohir.D06G047600
exact_07vs16_downregulated_SNPs	i13942Gh	D07	2326647	Gohir.D07G021600
exact_07vs16_downregulated_SNPs	i01452Gh	D07	4840259	Gohir.D07G043400
exact_07vs16_downregulated_SNPs	i01453Gh	D07	4840766	Gohir.D07G043400
exact_07vs16_downregulated_SNPs	i01454Gh	D07	4840887	Gohir.D07G043400
exact_07vs16_downregulated_SNPs	i01579Gh	D07	9273978	Gohir.D07G077000
exact_07vs16_downregulated_SNPs	i00230Gh	D10	6067354	Gohir.D10G061400
exact_07vs16_downregulated_SNPs	i11759Gh	D10	8457480	Gohir.D10G072500
exact_07vs16_downregulated_SNPs	i34262Gh	D10	8754657	Gohir.D10G073900
exact_07vs16_downregulated_SNPs	i20124Gh	D10	65920902	Gohir.D10G239800
exact_07vs16_downregulated_SNPs	i06879Gh	D11	4753323	Gohir.D11G053800
exact_07vs16_downregulated_SNPs	i07895Gh	D12	4869196	Gohir.D12G035600
exact_07vs16_downregulated_SNPs	i11538Gh	D13	4665719	Gohir.D13G039900
exact_07vs16_downregulated_SNPs	i13136Gh	D13	4978463	Gohir.D13G042100
exact_07vs16_downregulated_SNPs	i39846Gh	D13	35949460	Gohir.D13G108200
exact_07vs16_downregulated_SNPs	i39847Gh	D13	35949460	Gohir.D13G108200
exact_07vs16_downregulated_SNPs	i18045Gh	D13	55796230	Gohir.D13G166500
exact_07vs16_downregulated_SNPs	i41786Gh	D13	60995514	Gohir.D13G205500
exact_07vs16_downregulated_SNPs	i13812Gh	D13	62554533	Gohir.D13G216700
exact_07vs16_downregulated_SNPs	i13813Gh	D13	62571048	Gohir.D13G216800
1kb_07vs16_upregulated_SNPs	i52467Gb	A01	7488611	Gohir.A01G057200
1kb_07vs16_upregulated_SNPs	i26677Gh	A03	4551855	Gohir.A03G028400
1kb_07vs16_upregulated_SNPs	i25053Gh	A05	95365485	Gohir.A05G384300
1kb_07vs16_upregulated_SNPs	i43500Gh	A07	15089675	Gohir.A07G092100
1kb_07vs16_upregulated_SNPs	i45520Gh	A10	4289365	Gohir.A10G044300
1kb_07vs16_upregulated_SNPs	i26701Gh	A13	4648603	Gohir.A13G037400
1kb_07vs16_upregulated_SNPs	i05631Gh	D02	67049234	Gohir.D02G198100
1kb_07vs16_upregulated_SNPs	i03211Gh	D03	3551956	Gohir.D03G032100
1kb_07vs16_upregulated_SNPs	i46371Gh	D03	36480235	Gohir.D03G094800
1kb_07vs16_upregulated_SNPs	i09051Gh	D05	5184745	Gohir.D05G062500
1kb_07vs16_upregulated_SNPs	i09052Gh	D05	5185145	Gohir.D05G062500
1kb_07vs16_upregulated_SNPs	i16593Gh	D05	5339486	Gohir.D05G064300
1kb_07vs16_upregulated_SNPs	i00499Gh	D05	14325978	Gohir.D05G159900
1kb_07vs16_upregulated_SNPs	i10543Gh	D06	667787	Gohir.D06G007100
1kb_07vs16_upregulated_SNPs	i39917Gh	D06	1514210	Gohir.D06G014600
1kb_07vs16_upregulated_SNPs	i01692Gh	D07	14984994	Gohir.D07G108900
1kb_07vs16_upregulated_SNPs	i23331Gh	D07	20363367	Gohir.D07G130200
1kb_07vs16_upregulated_SNPs	i03860Gh	D08	2869798	Gohir.D08G029600
1kb_07vs16_upregulated_SNPs	i03950Gh	D08	5154614	Gohir.D08G049000
1kb_07vs16_upregulated_SNPs	i15023Gh	D08	5155013	Gohir.D08G049000
1kb_07vs16_upregulated_SNPs	i15024Gh	D08	5155088	Gohir.D08G049000
1kb_07vs16_upregulated_SNPs	i46484Gh	D08	38323416	Gohir.D08G117900
1kb_07vs16_upregulated_SNPs	i04521Gh	D08	61095762	Gohir.D08G199900
1kb_07vs16_upregulated_SNPs	i04620Gh	D08	63935990	Gohir.D08G217700
1kb_07vs16_upregulated_SNPs	i06452Gh	D09	48147114	Gohir.D09G187400
1kb_07vs16_upregulated_SNPs	i06518Gh	D09	49687457	Gohir.D09G205500
1kb_07vs16_upregulated_SNPs	i07163Gh	D11	14412515	Gohir.D11G142800
1kb_07vs16_upregulated_SNPs	i07880Gh	D12	4253847	Gohir.D12G032800
1kb_07vs16_upregulated_SNPs	i08215Gh	D12	49463807	Gohir.D12G154600
1kb_07vs16_downregulated_SNPs	i41324Gh	A01	4699417	Gohir.A01G043100
1kb_07vs16_downregulated_SNPs	i25036Gh	A03	6888749	Gohir.A03G037900
1kb_07vs16_downregulated_SNPs	i37142Gh	A05	9992457	Gohir.A05G107100
1kb_07vs16_downregulated_SNPs	i26952Gh	A06	2408108	Gohir.A06G021400
1kb_07vs16_downregulated_SNPs	i41052Gh	A06	16454480	Gohir.A06G067700
1kb_07vs16_downregulated_SNPs	i31170Gh	A09	73513329	Gohir.A09G162600
1kb_07vs16_downregulated_SNPs	i02197Gh	D01	636621	Gohir.D01G007900
1kb_07vs16_downregulated_SNPs	i02243Gh	D01	1542567	Gohir.D01G017600
1kb_07vs16_downregulated_SNPs	i01087Gh	D03	4994691	Gohir.D03G038800
1kb_07vs16_downregulated_SNPs	i03625Gh	D03	50374411	Gohir.D03G157000
1kb_07vs16_downregulated_SNPs	i03664Gh	D03	52094915	Gohir.D03G168100
1kb_07vs16_downregulated_SNPs	i09430Gh	D05	13269079	Gohir.D05G149600
1kb_07vs16_downregulated_SNPs	i10489Gh	D05	62250708	Gohir.D05G374200
1kb_07vs16_downregulated_SNPs	i00735Gh	D06	6447556	Gohir.D06G044000
1kb_07vs16_downregulated_SNPs	i10829Gh	D06	6447556	Gohir.D06G044000
1kb_07vs16_downregulated_SNPs	i36036Gh	D07	9037473	Gohir.D07G075800
1kb_07vs16_downregulated_SNPs	i01578Gh	D07	9271761	Gohir.D07G077000
1kb_07vs16_downregulated_SNPs	i03748Gh	D08	817272	Gohir.D08G010800
1kb_07vs16_downregulated_SNPs	i11532Gh	D10	1444870	Gohir.D10G016700
1kb_07vs16_downregulated_SNPs	i11619Gh	D10	3527294	Gohir.D10G040300
1kb_07vs16_downregulated_SNPs	i12075Gh	D10	53944371	Gohir.D10G183200
1kb_07vs16_downregulated_SNPs	i07896Gh	D12	4869626	Gohir.D12G035600
1kb_07vs16_downregulated_SNPs	i08084Gh	D12	43150216	Gohir.D12G121200
1kb_07vs16_downregulated_SNPs	i08559Gh	D12	58850474	Gohir.D12G225800
1kb_07vs16_downregulated_SNPs	i12984Gh	D13	825751	Gohir.D13G008700
10kb_07vs16_upregulated_SNPs	i33757Gh	A01	503513	Gohir.A01G005600
10kb_07vs16_upregulated_SNPs	i52467Gb	A01	7488611	Gohir.A01G057200
10kb_07vs16_upregulated_SNPs	i29384Gh	A01	16915493	Gohir.A01G096200
10kb_07vs16_upregulated_SNPs	i27483Gh	A01	16925266	Gohir.A01G096200
10kb_07vs16_upregulated_SNPs	i30010Gh	A01	95620433	Gohir.A01G182500
10kb_07vs16_upregulated_SNPs	i45902Gh	A01	95945668	Gohir.A01G183500
10kb_07vs16_upregulated_SNPs	i37916Gh	A01	98843488	Gohir.A01G194200
10kb_07vs16_upregulated_SNPs	i29713Gh	A01	98906455	Gohir.A01G194600
10kb_07vs16_upregulated_SNPs	i40498Gh	A01	103941653	Gohir.A01G231300
10kb_07vs16_upregulated_SNPs	i31438Gh	A01	103957687	Gohir.A01G231300
10kb_07vs16_upregulated_SNPs	i39305Gh	A02	1417365	Gohir.A02G013500
10kb_07vs16_upregulated_SNPs	i43830Gh	A02	3815283	Gohir.A02G031000
10kb_07vs16_upregulated_SNPs	i32118Gh	A03	1987454	Gohir.A03G012200
10kb_07vs16_upregulated_SNPs	i30018Gh	A03	4803486	Gohir.A03G030100
10kb_07vs16_upregulated_SNPs	i31031Gh	A03	5861231	Gohir.A03G035000
10kb_07vs16_upregulated_SNPs	i33642Gh	A03	104712973	Gohir.A03G177000
10kb_07vs16_upregulated_SNPs	i29716Gh	A04	9049810	Gohir.A04G040100
10kb_07vs16_upregulated_SNPs	i12800Gh	A04	80165138	Gohir.A04G126500
10kb_07vs16_upregulated_SNPs	i50654Gb	A05	1764388	Gohir.A05G017700
10kb_07vs16_upregulated_SNPs	i27817Gh	A05	2069694	Gohir.A05G021300
10kb_07vs16_upregulated_SNPs	i26206Gh	A05	3213808	Gohir.A05G032000
10kb_07vs16_upregulated_SNPs	i34179Gh	A05	5038366	Gohir.A05G050800
10kb_07vs16_upregulated_SNPs	i52913Gb	A05	6056670	Gohir.A05G064100
10kb_07vs16_upregulated_SNPs	i22330Gh	A05	7786449	Gohir.A05G081300
10kb_07vs16_upregulated_SNPs	i41358Gh	A05	7789129	Gohir.A05G081300
10kb_07vs16_upregulated_SNPs	i00260Gh	A05	18227999	Gohir.A05G185900
10kb_07vs16_upregulated_SNPs	i46592Gh	A05	85323439	Gohir.A05G348300
10kb_07vs16_upregulated_SNPs	i26019Gh	A05	94894340	Gohir.A05G382100
10kb_07vs16_upregulated_SNPs	i46433Gh	A05	98721758	Gohir.A05G401500
10kb_07vs16_upregulated_SNPs	i22344Gh	A05	98780677	Gohir.A05G401800
10kb_07vs16_upregulated_SNPs	i66040Ga	A06	83672	Gohir.A06G001300
10kb_07vs16_upregulated_SNPs	i52593Gb	A06	83960	Gohir.A06G001300
10kb_07vs16_upregulated_SNPs	i22270Gh	A07	5450350	Gohir.A07G044700
10kb_07vs16_upregulated_SNPs	i59099Gb	A07	21101533	Gohir.A07G113300
10kb_07vs16_upregulated_SNPs	i38889Gh	A07	27134565	Gohir.A07G130800
10kb_07vs16_upregulated_SNPs	i35445Gh	A07	27656584	Gohir.A07G132100
10kb_07vs16_upregulated_SNPs	i35992Gh	A08	9829360	Gohir.A08G061500
10kb_07vs16_upregulated_SNPs	i40244Gh	A08	65057117	Gohir.A08G099900
10kb_07vs16_upregulated_SNPs	i32346Gh	A08	103200009	Gohir.A08G141600
10kb_07vs16_upregulated_SNPs	i48390Gh	A08	107799026	Gohir.A08G154200
10kb_07vs16_upregulated_SNPs	i44019Gh	A08	113802824	Gohir.A08G177500
10kb_07vs16_upregulated_SNPs	i32773Gh	A08	113808651	Gohir.A08G177500
10kb_07vs16_upregulated_SNPs	i44939Gh	A09	57772752	Gohir.A09G073900
10kb_07vs16_upregulated_SNPs	i22655Gh	A09	71360444	Gohir.A09G144100
10kb_07vs16_upregulated_SNPs	i38769Gh	A09	71360444	Gohir.A09G144100
10kb_07vs16_upregulated_SNPs	i00808Gh	A09	71360625	Gohir.A09G144100
10kb_07vs16_upregulated_SNPs	i00903Gh	A09	72531111	Gohir.A09G151700
10kb_07vs16_upregulated_SNPs	i19251Gh	A09	81620018	Gohir.A09G246000
10kb_07vs16_upregulated_SNPs	i68116Gl	A09	81627875	Gohir.A09G246000
10kb_07vs16_upregulated_SNPs	i49582Gh	A10	3141077	Gohir.A10G034900
10kb_07vs16_upregulated_SNPs	i00426Gh	A10	3152138	Gohir.A10G034900
10kb_07vs16_upregulated_SNPs	i00425Gh	A10	3152588	Gohir.A10G034900
10kb_07vs16_upregulated_SNPs	i00185Gh	A10	10371676	Gohir.A10G068800
10kb_07vs16_upregulated_SNPs	i48450Gh	A10	102593269	Gohir.A10G196300
10kb_07vs16_upregulated_SNPs	i44024Gh	A10	111036137	Gohir.A10G235900
10kb_07vs16_upregulated_SNPs	i06853Gh	A11	4333477	Gohir.A11G047100
10kb_07vs16_upregulated_SNPs	i39297Gh	A11	13728595	Gohir.A11G123700
10kb_07vs16_upregulated_SNPs	i00397Gh	A11	13781670	Gohir.A11G124500
10kb_07vs16_upregulated_SNPs	i34739Gh	A12	81088338	Gohir.A12G136800
10kb_07vs16_upregulated_SNPs	i35524Gh	A12	93131876	Gohir.A12G187100
10kb_07vs16_upregulated_SNPs	i46850Gh	D01	1991935	Gohir.D01G022300
10kb_07vs16_upregulated_SNPs	i31026Gh	D01	4383006	Gohir.D01G039200
10kb_07vs16_upregulated_SNPs	i22166Gh	D01	4424020	Gohir.D01G039600
10kb_07vs16_upregulated_SNPs	i34009Gh	D01	5106685	Gohir.D01G043400
10kb_07vs16_upregulated_SNPs	i30908Gh	D01	44482297	Gohir.D01G140900
10kb_07vs16_upregulated_SNPs	i02702Gh	D01	44484746	Gohir.D01G140900
10kb_07vs16_upregulated_SNPs	i02703Gh	D01	44487557	Gohir.D01G140900
10kb_07vs16_upregulated_SNPs	i02910Gh	D01	59983731	Gohir.D01G184600
10kb_07vs16_upregulated_SNPs	i03003Gh	D01	62150168	Gohir.D01G198000
10kb_07vs16_upregulated_SNPs	i42410Gh	D02	1493875	Gohir.D02G013000
10kb_07vs16_upregulated_SNPs	i05036Gh	D02	4828832	Gohir.D02G037900
10kb_07vs16_upregulated_SNPs	i05086Gh	D02	6744649	Gohir.D02G052100
10kb_07vs16_upregulated_SNPs	i05087Gh	D02	6745120	Gohir.D02G052100
10kb_07vs16_upregulated_SNPs	i05090Gh	D02	6748976	Gohir.D02G052100
10kb_07vs16_upregulated_SNPs	i45511Gh	D02	17600843	Gohir.D02G089900
10kb_07vs16_upregulated_SNPs	i27231Gh	D02	22261036	Gohir.D02G095500
10kb_07vs16_upregulated_SNPs	i23762Gh	D02	22262831	Gohir.D02G095500
10kb_07vs16_upregulated_SNPs	i18956Gh	D02	52374507	Gohir.D02G143300
10kb_07vs16_upregulated_SNPs	i25165Gh	D02	55794175	Gohir.D02G150100
10kb_07vs16_upregulated_SNPs	i15520Gh	D02	63070154	Gohir.D02G174000
10kb_07vs16_upregulated_SNPs	i15521Gh	D02	63070232	Gohir.D02G174000
10kb_07vs16_upregulated_SNPs	i05521Gh	D02	63178747	Gohir.D02G174800
10kb_07vs16_upregulated_SNPs	i19038Gh	D02	63584399	Gohir.D02G176600
10kb_07vs16_upregulated_SNPs	i05645Gh	D02	67326294	Gohir.D02G200400
10kb_07vs16_upregulated_SNPs	i05647Gh	D02	67331884	Gohir.D02G200400
10kb_07vs16_upregulated_SNPs	i05648Gh	D02	67332268	Gohir.D02G200400
10kb_07vs16_upregulated_SNPs	i05692Gh	D02	68022480	Gohir.D02G206200
10kb_07vs16_upregulated_SNPs	i05694Gh	D02	68023387	Gohir.D02G206200
10kb_07vs16_upregulated_SNPs	i14820Gh	D03	1286614	Gohir.D03G017000
10kb_07vs16_upregulated_SNPs	i03210Gh	D03	3542613	Gohir.D03G032100
10kb_07vs16_upregulated_SNPs	i00652Gh	D03	3556281	Gohir.D03G032100
10kb_07vs16_upregulated_SNPs	i14843Gh	D03	4431473	Gohir.D03G036900
10kb_07vs16_upregulated_SNPs	i18550Gh	D03	33364341	Gohir.D03G087000
10kb_07vs16_upregulated_SNPs	i27860Gh	D03	36474192	Gohir.D03G094800
10kb_07vs16_upregulated_SNPs	i38610Gh	D03	48587322	Gohir.D03G144500
10kb_07vs16_upregulated_SNPs	i42330Gh	D03	48588744	Gohir.D03G144500
10kb_07vs16_upregulated_SNPs	i20139Gh	D04	1323954	Gohir.D04G009900
10kb_07vs16_upregulated_SNPs	i17842Gh	D04	52490331	Gohir.D04G157100
10kb_07vs16_upregulated_SNPs	i20217Gh	D04	52491201	Gohir.D04G157100
10kb_07vs16_upregulated_SNPs	i12897Gh	D04	53900174	Gohir.D04G169500
10kb_07vs16_upregulated_SNPs	i01096Gh	D04	56144468	Gohir.D04G187500
10kb_07vs16_upregulated_SNPs	i00753Gh	D04	56145124	Gohir.D04G187500
10kb_07vs16_upregulated_SNPs	i22028Gh	D05	658515	Gohir.D05G006100
10kb_07vs16_upregulated_SNPs	i08796Gh	D05	760381	Gohir.D05G007100
10kb_07vs16_upregulated_SNPs	i08797Gh	D05	761500	Gohir.D05G007100
10kb_07vs16_upregulated_SNPs	i08863Gh	D05	2415652	Gohir.D05G026700
10kb_07vs16_upregulated_SNPs	i08871Gh	D05	2546091	Gohir.D05G028600
10kb_07vs16_upregulated_SNPs	i08973Gh	D05	4298718	Gohir.D05G051400
10kb_07vs16_upregulated_SNPs	i16593Gh	D05	5339486	Gohir.D05G064300
10kb_07vs16_upregulated_SNPs	i16608Gh	D05	6279172	Gohir.D05G074800
10kb_07vs16_upregulated_SNPs	i09124Gh	D05	6639411	Gohir.D05G079100
10kb_07vs16_upregulated_SNPs	i44267Gh	D05	9233997	Gohir.D05G107800
10kb_07vs16_upregulated_SNPs	i09246Gh	D05	9236421	Gohir.D05G107800
10kb_07vs16_upregulated_SNPs	i09296Gh	D05	10578749	Gohir.D05G121100
10kb_07vs16_upregulated_SNPs	i09407Gh	D05	12937960	Gohir.D05G146700
10kb_07vs16_upregulated_SNPs	i09409Gh	D05	12941001	Gohir.D05G146700
10kb_07vs16_upregulated_SNPs	i09467Gh	D05	13838820	Gohir.D05G155500
10kb_07vs16_upregulated_SNPs	i09486Gh	D05	14466186	Gohir.D05G161100
10kb_07vs16_upregulated_SNPs	i69754Gl	D05	14466952	Gohir.D05G161100
10kb_07vs16_upregulated_SNPs	i09491Gh	D05	14675413	Gohir.D05G162900
10kb_07vs16_upregulated_SNPs	i38854Gh	D05	19230218	Gohir.D05G213000
10kb_07vs16_upregulated_SNPs	i19575Gh	D05	19437865	Gohir.D05G214900
10kb_07vs16_upregulated_SNPs	i65919Ga	D05	19438153	Gohir.D05G214900
10kb_07vs16_upregulated_SNPs	i09743Gh	D05	22627245	Gohir.D05G239600
10kb_07vs16_upregulated_SNPs	i09744Gh	D05	22628430	Gohir.D05G239600
10kb_07vs16_upregulated_SNPs	i43120Gh	D05	29643866	Gohir.D05G285600
10kb_07vs16_upregulated_SNPs	i47165Gh	D05	37907494	Gohir.D05G310600
10kb_07vs16_upregulated_SNPs	i60789Gt	D06	676226	Gohir.D06G007100
10kb_07vs16_upregulated_SNPs	i10544Gh	D06	677018	Gohir.D06G007100
10kb_07vs16_upregulated_SNPs	i10545Gh	D06	677421	Gohir.D06G007100
10kb_07vs16_upregulated_SNPs	i17080Gh	D06	677766	Gohir.D06G007100
10kb_07vs16_upregulated_SNPs	i17081Gh	D06	677838	Gohir.D06G007100
10kb_07vs16_upregulated_SNPs	i62915Gt	D06	1451621	Gohir.D06G013900
10kb_07vs16_upregulated_SNPs	i10605Gh	D06	1470161	Gohir.D06G013900
10kb_07vs16_upregulated_SNPs	i10609Gh	D06	1520727	Gohir.D06G014600
10kb_07vs16_upregulated_SNPs	i52559Gb	D06	1706451	Gohir.D06G016600
10kb_07vs16_upregulated_SNPs	i17136Gh	D06	2002685	Gohir.D06G019300
10kb_07vs16_upregulated_SNPs	i64008Gm	D06	3193563	Gohir.D06G027600
10kb_07vs16_upregulated_SNPs	i50575Gb	D06	3193592	Gohir.D06G027600
10kb_07vs16_upregulated_SNPs	i53223Gb	D06	3193884	Gohir.D06G027600
10kb_07vs16_upregulated_SNPs	i10728Gh	D06	3202145	Gohir.D06G027600
10kb_07vs16_upregulated_SNPs	i10729Gh	D06	3202332	Gohir.D06G027600
10kb_07vs16_upregulated_SNPs	i10730Gh	D06	3204095	Gohir.D06G027600
10kb_07vs16_upregulated_SNPs	i10770Gh	D06	4125791	Gohir.D06G033900
10kb_07vs16_upregulated_SNPs	i45044Gh	D06	22655979	Gohir.D06G097200
10kb_07vs16_upregulated_SNPs	i39708Gh	D06	26027968	Gohir.D06G105700
10kb_07vs16_upregulated_SNPs	i11242Gh	D06	58591246	Gohir.D06G155800
10kb_07vs16_upregulated_SNPs	i14319Gh	D07	5282633	Gohir.D07G047900
10kb_07vs16_upregulated_SNPs	i22123Gh	D07	5930937	Gohir.D07G053000
10kb_07vs16_upregulated_SNPs	i01676Gh	D07	13807848	Gohir.D07G103300
10kb_07vs16_upregulated_SNPs	i01677Gh	D07	13808500	Gohir.D07G103300
10kb_07vs16_upregulated_SNPs	i42582Gh	D07	14209247	Gohir.D07G105700
10kb_07vs16_upregulated_SNPs	i01916Gh	D07	29880130	Gohir.D07G160700
10kb_07vs16_upregulated_SNPs	i28326Gh	D07	31101511	Gohir.D07G164300
10kb_07vs16_upregulated_SNPs	i02007Gh	D07	50536751	Gohir.D07G196600
10kb_07vs16_upregulated_SNPs	i45908Gh	D07	52608019	Gohir.D07G204500
10kb_07vs16_upregulated_SNPs	i41870Gh	D07	52615316	Gohir.D07G204700
10kb_07vs16_upregulated_SNPs	i46746Gh	D07	52802463	Gohir.D07G205400
10kb_07vs16_upregulated_SNPs	i02142Gh	D07	57489482	Gohir.D07G236100
10kb_07vs16_upregulated_SNPs	i03798Gh	D08	1725458	Gohir.D08G020300
10kb_07vs16_upregulated_SNPs	i03822Gh	D08	2318317	Gohir.D08G025700
10kb_07vs16_upregulated_SNPs	i03823Gh	D08	2322849	Gohir.D08G025700
10kb_07vs16_upregulated_SNPs	i03824Gh	D08	2323046	Gohir.D08G025700
10kb_07vs16_upregulated_SNPs	i03825Gh	D08	2324770	Gohir.D08G025700
10kb_07vs16_upregulated_SNPs	i34638Gh	D08	2860379	Gohir.D08G029600
10kb_07vs16_upregulated_SNPs	i01143Gh	D08	2861931	Gohir.D08G029600
10kb_07vs16_upregulated_SNPs	i64921Gm	D08	2862490	Gohir.D08G029600
10kb_07vs16_upregulated_SNPs	i48272Gh	D08	2863955	Gohir.D08G029600
10kb_07vs16_upregulated_SNPs	i03951Gh	D08	5155630	Gohir.D08G049000
10kb_07vs16_upregulated_SNPs	i03952Gh	D08	5161743	Gohir.D08G049000
10kb_07vs16_upregulated_SNPs	i03960Gh	D08	5404819	Gohir.D08G050700
10kb_07vs16_upregulated_SNPs	i03962Gh	D08	5420140	Gohir.D08G050700
10kb_07vs16_upregulated_SNPs	i23707Gh	D08	17804960	Gohir.D08G092200
10kb_07vs16_upregulated_SNPs	i38700Gh	D08	19246189	Gohir.D08G093900
10kb_07vs16_upregulated_SNPs	i04423Gh	D08	55872362	Gohir.D08G173600
10kb_07vs16_upregulated_SNPs	i04427Gh	D08	55993038	Gohir.D08G174400
10kb_07vs16_upregulated_SNPs	i15176Gh	D08	61467804	Gohir.D08G202200
10kb_07vs16_upregulated_SNPs	i15177Gh	D08	61467902	Gohir.D08G202200
10kb_07vs16_upregulated_SNPs	i15210Gh	D08	64030727	Gohir.D08G218700
10kb_07vs16_upregulated_SNPs	i04628Gh	D08	64037617	Gohir.D08G218700
10kb_07vs16_upregulated_SNPs	i04635Gh	D08	64319599	Gohir.D08G220500
10kb_07vs16_upregulated_SNPs	i15217Gh	D08	64327226	Gohir.D08G220500
10kb_07vs16_upregulated_SNPs	i04799Gh	D08	68306166	Gohir.D08G254900
10kb_07vs16_upregulated_SNPs	i26114Gh	D09	38470215	Gohir.D09G107700
10kb_07vs16_upregulated_SNPs	i06206Gh	D09	42138927	Gohir.D09G132300
10kb_07vs16_upregulated_SNPs	i06207Gh	D09	42140573	Gohir.D09G132300
10kb_07vs16_upregulated_SNPs	i15747Gh	D09	42141180	Gohir.D09G132300
10kb_07vs16_upregulated_SNPs	i43319Gh	D09	43421896	Gohir.D09G141800
10kb_07vs16_upregulated_SNPs	i60841Gt	D09	44094714	Gohir.D09G147400
10kb_07vs16_upregulated_SNPs	i19236Gh	D09	44097359	Gohir.D09G147400
10kb_07vs16_upregulated_SNPs	i06349Gh	D09	45240723	Gohir.D09G159300
10kb_07vs16_upregulated_SNPs	i19240Gh	D09	45253405	Gohir.D09G159300
10kb_07vs16_upregulated_SNPs	i15821Gh	D09	49152550	Gohir.D09G199000
10kb_07vs16_upregulated_SNPs	i06499Gh	D09	49153097	Gohir.D09G199000
10kb_07vs16_upregulated_SNPs	i15823Gh	D09	49155358	Gohir.D09G199000
10kb_07vs16_upregulated_SNPs	i06518Gh	D09	49687457	Gohir.D09G205500
10kb_07vs16_upregulated_SNPs	i06520Gh	D09	49690854	Gohir.D09G205500
10kb_07vs16_upregulated_SNPs	i15829Gh	D09	49700571	Gohir.D09G205500
10kb_07vs16_upregulated_SNPs	i06522Gh	D09	49701011	Gohir.D09G205500
10kb_07vs16_upregulated_SNPs	i15830Gh	D09	49707487	Gohir.D09G205500
10kb_07vs16_upregulated_SNPs	i06624Gh	D09	51987908	Gohir.D09G230800
10kb_07vs16_upregulated_SNPs	i06625Gh	D09	51990344	Gohir.D09G230800
10kb_07vs16_upregulated_SNPs	i06632Gh	D09	52229839	Gohir.D09G234600
10kb_07vs16_upregulated_SNPs	i11500Gh	D10	1110845	Gohir.D10G012900
10kb_07vs16_upregulated_SNPs	i11501Gh	D10	1114987	Gohir.D10G012900
10kb_07vs16_upregulated_SNPs	i11600Gh	D10	3284452	Gohir.D10G037500
10kb_07vs16_upregulated_SNPs	i17425Gh	D10	3285315	Gohir.D10G037500
10kb_07vs16_upregulated_SNPs	i17426Gh	D10	3285395	Gohir.D10G037500
10kb_07vs16_upregulated_SNPs	i11602Gh	D10	3312248	Gohir.D10G037700
10kb_07vs16_upregulated_SNPs	i11604Gh	D10	3313370	Gohir.D10G037700
10kb_07vs16_upregulated_SNPs	i51628Gb	D10	3316165	Gohir.D10G037700
10kb_07vs16_upregulated_SNPs	i17452Gh	D10	6770502	Gohir.D10G065900
10kb_07vs16_upregulated_SNPs	i12144Gh	D10	58879231	Gohir.D10G202900
10kb_07vs16_upregulated_SNPs	i12154Gh	D10	59798303	Gohir.D10G206900
10kb_07vs16_upregulated_SNPs	i06825Gh	D11	3319493	Gohir.D11G039200
10kb_07vs16_upregulated_SNPs	i14092Gh	D11	3474406	Gohir.D11G041400
10kb_07vs16_upregulated_SNPs	i06877Gh	D11	4728163	Gohir.D11G053700
10kb_07vs16_upregulated_SNPs	i06887Gh	D11	4936567	Gohir.D11G057200
10kb_07vs16_upregulated_SNPs	i06888Gh	D11	4936680	Gohir.D11G057200
10kb_07vs16_upregulated_SNPs	i06889Gh	D11	4938559	Gohir.D11G057200
10kb_07vs16_upregulated_SNPs	i15946Gh	D11	6568613	Gohir.D11G076500
10kb_07vs16_upregulated_SNPs	i15987Gh	D11	13498129	Gohir.D11G135800
10kb_07vs16_upregulated_SNPs	i07498Gh	D11	61968887	Gohir.D11G278100
10kb_07vs16_upregulated_SNPs	i07767Gh	D12	503318	Gohir.D12G003400
10kb_07vs16_upregulated_SNPs	i29942Gh	D12	508452	Gohir.D12G003400
10kb_07vs16_upregulated_SNPs	i36260Gh	D12	1225839	Gohir.D12G010700
10kb_07vs16_upregulated_SNPs	i07795Gh	D12	1316359	Gohir.D12G010900
10kb_07vs16_upregulated_SNPs	i35751Gh	D12	3199499	Gohir.D12G025500
10kb_07vs16_upregulated_SNPs	i46017Gh	D12	3204105	Gohir.D12G025500
10kb_07vs16_upregulated_SNPs	i08214Gh	D12	49463175	Gohir.D12G154600
10kb_07vs16_upregulated_SNPs	i42284Gh	D12	51244595	Gohir.D12G165300
10kb_07vs16_upregulated_SNPs	i08262Gh	D12	51251309	Gohir.D12G165300
10kb_07vs16_upregulated_SNPs	i51807Gb	D12	54828354	Gohir.D12G190400
10kb_07vs16_upregulated_SNPs	i49026Gh	D12	54841588	Gohir.D12G190400
10kb_07vs16_upregulated_SNPs	i16515Gh	D12	61997601	Gohir.D12G258200
10kb_07vs16_upregulated_SNPs	i08749Gh	D12	62266209	Gohir.D12G260700
10kb_07vs16_upregulated_SNPs	i13001Gh	D13	1444270	Gohir.D13G015300
10kb_07vs16_upregulated_SNPs	i22781Gh	D13	5091572	Gohir.D13G042600
10kb_07vs16_upregulated_SNPs	i34898Gh	D13	41783223	Gohir.D13G122300
10kb_07vs16_upregulated_SNPs	i23631Gh	D13	42240219	Gohir.D13G123200
10kb_07vs16_upregulated_SNPs	i20357Gh	D13	56892817	Gohir.D13G172000
10kb_07vs16_upregulated_SNPs	i11420Gh	D13	57756253	Gohir.D13G178700
10kb_07vs16_upregulated_SNPs	i11418Gh	D13	57766262	Gohir.D13G178700
10kb_07vs16_upregulated_SNPs	i13839Gh	D13	62847291	Gohir.D13G220200
10kb_07vs16_downregulated_SNPs	i32268Gh	A01	3378865	Gohir.A01G033700
10kb_07vs16_downregulated_SNPs	i47971Gh	A01	12327378	Gohir.A01G080300
10kb_07vs16_downregulated_SNPs	i37932Gh	A01	98963365	Gohir.A01G195000
10kb_07vs16_downregulated_SNPs	i48294Gh	A01	100230406	Gohir.A01G202700
10kb_07vs16_downregulated_SNPs	i23867Gh	A01	102856016	Gohir.A01G220700
10kb_07vs16_downregulated_SNPs	i25036Gh	A03	6888749	Gohir.A03G037900
10kb_07vs16_downregulated_SNPs	i29903Gh	A03	6996326	Gohir.A03G038500
10kb_07vs16_downregulated_SNPs	i45631Gh	A03	107693673	Gohir.A03G205200
10kb_07vs16_downregulated_SNPs	i30210Gh	A05	9981433	Gohir.A05G107100
10kb_07vs16_downregulated_SNPs	i45478Gh	A05	14154947	Gohir.A05G147100
10kb_07vs16_downregulated_SNPs	i47763Gh	A05	21120971	Gohir.A05G210800
10kb_07vs16_downregulated_SNPs	i31875Gh	A05	24584960	Gohir.A05G237400
10kb_07vs16_downregulated_SNPs	i09872Gh	A05	29171994	Gohir.A05G262200
10kb_07vs16_downregulated_SNPs	i44532Gh	A05	94054079	Gohir.A05G378400
10kb_07vs16_downregulated_SNPs	i10713Gh	A06	2950589	Gohir.A06G026300
10kb_07vs16_downregulated_SNPs	i44441Gh	A06	16444680	Gohir.A06G067700
10kb_07vs16_downregulated_SNPs	i01329Gh	A07	1745300	Gohir.A07G014900
10kb_07vs16_downregulated_SNPs	i57007Gb	A07	5679376	Gohir.A07G046600
10kb_07vs16_downregulated_SNPs	i28204Gh	A07	10158164	Gohir.A07G072500
10kb_07vs16_downregulated_SNPs	i36939Gh	A07	20706094	Gohir.A07G112000
10kb_07vs16_downregulated_SNPs	i52426Gb	A08	107137585	Gohir.A08G152500
10kb_07vs16_downregulated_SNPs	i55121Gb	A08	107137701	Gohir.A08G152500
10kb_07vs16_downregulated_SNPs	i61605Gt	A08	107137701	Gohir.A08G152500
10kb_07vs16_downregulated_SNPs	i64062Gm	A08	107137701	Gohir.A08G152500
10kb_07vs16_downregulated_SNPs	i00216Gh	A08	115003673	Gohir.A08G181600
10kb_07vs16_downregulated_SNPs	i00217Gh	A08	115003781	Gohir.A08G181600
10kb_07vs16_downregulated_SNPs	i37220Gh	A08	115819222	Gohir.A08G187600
10kb_07vs16_downregulated_SNPs	i04625Gh	A08	117549567	Gohir.A08G197700
10kb_07vs16_downregulated_SNPs	i04708Gh	A08	120028064	Gohir.A08G216900
10kb_07vs16_downregulated_SNPs	i47116Gh	A09	9864231	Gohir.A09G029100
10kb_07vs16_downregulated_SNPs	i46939Gh	A09	9864691	Gohir.A09G029100
10kb_07vs16_downregulated_SNPs	i26936Gh	A09	15566800	Gohir.A09G034400
10kb_07vs16_downregulated_SNPs	i21353Gh	A09	61127117	Gohir.A09G090000
10kb_07vs16_downregulated_SNPs	i26283Gh	A09	73260078	Gohir.A09G160300
10kb_07vs16_downregulated_SNPs	i39237Gh	A10	7844053	Gohir.A10G064400
10kb_07vs16_downregulated_SNPs	i47050Gh	A10	108788256	Gohir.A10G222200
10kb_07vs16_downregulated_SNPs	i00794Gh	A11	1115088	Gohir.A11G011300
10kb_07vs16_downregulated_SNPs	i06844Gh	A11	3985330	Gohir.A11G043500
10kb_07vs16_downregulated_SNPs	i30318Gh	A12	3214691	Gohir.A12G022900
10kb_07vs16_downregulated_SNPs	i34477Gh	A12	81189329	Gohir.A12G137200
10kb_07vs16_downregulated_SNPs	i35387Gh	A12	81191227	Gohir.A12G137200
10kb_07vs16_downregulated_SNPs	i19467Gh	A12	92969835	Gohir.A12G185700
10kb_07vs16_downregulated_SNPs	i41913Gh	A12	96125263	Gohir.A12G207800
10kb_07vs16_downregulated_SNPs	i48181Gh	A12	96666834	Gohir.A12G211700
10kb_07vs16_downregulated_SNPs	i33030Gh	A13	28212	Gohir.A13G000100
10kb_07vs16_downregulated_SNPs	i33031Gh	A13	164092	Gohir.A13G001400
10kb_07vs16_downregulated_SNPs	i35443Gh	A13	4210203	Gohir.A13G033900
10kb_07vs16_downregulated_SNPs	i40849Gh	A13	87031321	Gohir.A13G135700
10kb_07vs16_downregulated_SNPs	i27553Gh	D01	931953	Gohir.D01G011300
10kb_07vs16_downregulated_SNPs	i02244Gh	D01	1551505	Gohir.D01G017600
10kb_07vs16_downregulated_SNPs	i02246Gh	D01	1551852	Gohir.D01G017600
10kb_07vs16_downregulated_SNPs	i02538Gh	D01	15150243	Gohir.D01G088500
10kb_07vs16_downregulated_SNPs	i34978Gh	D01	19822191	Gohir.D01G105200
10kb_07vs16_downregulated_SNPs	i41852Gh	D01	55876042	Gohir.D01G164400
10kb_07vs16_downregulated_SNPs	i02797Gh	D01	55914399	Gohir.D01G164500
10kb_07vs16_downregulated_SNPs	i02862Gh	D01	57765978	Gohir.D01G174400
10kb_07vs16_downregulated_SNPs	i45702Gh	D01	57778831	Gohir.D01G174400
10kb_07vs16_downregulated_SNPs	i23263Gh	D01	61175014	Gohir.D01G192700
10kb_07vs16_downregulated_SNPs	i15340Gh	D02	1910312	Gohir.D02G015800
10kb_07vs16_downregulated_SNPs	i04922Gh	D02	1911192	Gohir.D02G015800
10kb_07vs16_downregulated_SNPs	i04923Gh	D02	1912250	Gohir.D02G015800
10kb_07vs16_downregulated_SNPs	i15347Gh	D02	2674750	Gohir.D02G019900
10kb_07vs16_downregulated_SNPs	i04952Gh	D02	2679681	Gohir.D02G019900
10kb_07vs16_downregulated_SNPs	i25870Gh	D02	4830688	Gohir.D02G038200
10kb_07vs16_downregulated_SNPs	i23348Gh	D02	61296742	Gohir.D02G167500
10kb_07vs16_downregulated_SNPs	i05464Gh	D02	61313554	Gohir.D02G167500
10kb_07vs16_downregulated_SNPs	i50379Gb	D02	61313554	Gohir.D02G167500
10kb_07vs16_downregulated_SNPs	i05524Gh	D02	63249859	Gohir.D02G174900
10kb_07vs16_downregulated_SNPs	i33709Gh	D02	63257191	Gohir.D02G174900
10kb_07vs16_downregulated_SNPs	i05526Gh	D02	63259605	Gohir.D02G174900
10kb_07vs16_downregulated_SNPs	i18519Gh	D03	2585110	Gohir.D03G025700
10kb_07vs16_downregulated_SNPs	i03202Gh	D03	3366483	Gohir.D03G030700
10kb_07vs16_downregulated_SNPs	i26171Gh	D03	20819784	Gohir.D03G069400
10kb_07vs16_downregulated_SNPs	i43459Gh	D03	51414563	Gohir.D03G163900
10kb_07vs16_downregulated_SNPs	i03666Gh	D03	52106472	Gohir.D03G168100
10kb_07vs16_downregulated_SNPs	i17702Gh	D04	1676729	Gohir.D04G012500
10kb_07vs16_downregulated_SNPs	i12608Gh	D04	9648647	Gohir.D04G055100
10kb_07vs16_downregulated_SNPs	i08823Gh	D05	1637753	Gohir.D05G017300
10kb_07vs16_downregulated_SNPs	i08825Gh	D05	1691948	Gohir.D05G017800
10kb_07vs16_downregulated_SNPs	i08841Gh	D05	1985988	Gohir.D05G021600
10kb_07vs16_downregulated_SNPs	i08865Gh	D05	2462390	Gohir.D05G027600
10kb_07vs16_downregulated_SNPs	i08982Gh	D05	4443144	Gohir.D05G052600
10kb_07vs16_downregulated_SNPs	i09145Gh	D05	6963101	Gohir.D05G082600
10kb_07vs16_downregulated_SNPs	i09147Gh	D05	6975281	Gohir.D05G082600
10kb_07vs16_downregulated_SNPs	i16644Gh	D05	9807872	Gohir.D05G113100
10kb_07vs16_downregulated_SNPs	i09389Gh	D05	12632800	Gohir.D05G142700
10kb_07vs16_downregulated_SNPs	i09390Gh	D05	12641387	Gohir.D05G142700
10kb_07vs16_downregulated_SNPs	i46042Gh	D05	18150455	Gohir.D05G201500
10kb_07vs16_downregulated_SNPs	i00599Gh	D05	19969757	Gohir.D05G219300
10kb_07vs16_downregulated_SNPs	i09672Gh	D05	19980577	Gohir.D05G219300
10kb_07vs16_downregulated_SNPs	i41356Gh	D05	20395379	Gohir.D05G222000
10kb_07vs16_downregulated_SNPs	i09696Gh	D05	20550430	Gohir.D05G223200
10kb_07vs16_downregulated_SNPs	i00312Gh	D05	25756727	Gohir.D05G262300
10kb_07vs16_downregulated_SNPs	i09926Gh	D05	27500877	Gohir.D05G274400
10kb_07vs16_downregulated_SNPs	i09927Gh	D05	27501479	Gohir.D05G274400
10kb_07vs16_downregulated_SNPs	i43359Gh	D05	27501825	Gohir.D05G274400
10kb_07vs16_downregulated_SNPs	i10019Gh	D05	30755214	Gohir.D05G291100
10kb_07vs16_downregulated_SNPs	i16817Gh	D05	30768859	Gohir.D05G291100
10kb_07vs16_downregulated_SNPs	i00141Gh	D05	30768904	Gohir.D05G291100
10kb_07vs16_downregulated_SNPs	i20947Gh	D05	32779783	Gohir.D05G297800
10kb_07vs16_downregulated_SNPs	i16247Gh	D05	60194926	Gohir.D05G364000
10kb_07vs16_downregulated_SNPs	i19721Gh	D06	155831	Gohir.D06G002100
10kb_07vs16_downregulated_SNPs	i10540Gh	D06	491959	Gohir.D06G004300
10kb_07vs16_downregulated_SNPs	i10541Gh	D06	493561	Gohir.D06G004300
10kb_07vs16_downregulated_SNPs	i19724Gh	D06	570700	Gohir.D06G005500
10kb_07vs16_downregulated_SNPs	i10548Gh	D06	781473	Gohir.D06G008100
10kb_07vs16_downregulated_SNPs	i35060Gh	D06	1415216	Gohir.D06G013400
10kb_07vs16_downregulated_SNPs	i10624Gh	D06	1717367	Gohir.D06G016800
10kb_07vs16_downregulated_SNPs	i10625Gh	D06	1717473	Gohir.D06G016800
10kb_07vs16_downregulated_SNPs	i10628Gh	D06	1729251	Gohir.D06G016800
10kb_07vs16_downregulated_SNPs	i19742Gh	D06	1734322	Gohir.D06G016800
10kb_07vs16_downregulated_SNPs	i10669Gh	D06	2197470	Gohir.D06G020400
10kb_07vs16_downregulated_SNPs	i10671Gh	D06	2198853	Gohir.D06G020400
10kb_07vs16_downregulated_SNPs	i10684Gh	D06	2422539	Gohir.D06G022400
10kb_07vs16_downregulated_SNPs	i10687Gh	D06	2425543	Gohir.D06G022400
10kb_07vs16_downregulated_SNPs	i10688Gh	D06	2425831	Gohir.D06G022400
10kb_07vs16_downregulated_SNPs	i17148Gh	D06	2430373	Gohir.D06G022400
10kb_07vs16_downregulated_SNPs	i10828Gh	D06	6439644	Gohir.D06G044000
10kb_07vs16_downregulated_SNPs	i23207Gh	D06	24058192	Gohir.D06G101200
10kb_07vs16_downregulated_SNPs	i25394Gh	D07	2320099	Gohir.D07G021600
10kb_07vs16_downregulated_SNPs	i01352Gh	D07	2335077	Gohir.D07G021600
10kb_07vs16_downregulated_SNPs	i01582Gh	D07	9333282	Gohir.D07G077900
10kb_07vs16_downregulated_SNPs	i01583Gh	D07	9337014	Gohir.D07G077900
10kb_07vs16_downregulated_SNPs	i01584Gh	D07	9337912	Gohir.D07G077900
10kb_07vs16_downregulated_SNPs	i01587Gh	D07	9338757	Gohir.D07G077900
10kb_07vs16_downregulated_SNPs	i01651Gh	D07	12092735	Gohir.D07G095200
10kb_07vs16_downregulated_SNPs	i43873Gh	D07	12094229	Gohir.D07G095200
10kb_07vs16_downregulated_SNPs	i18229Gh	D07	15292292	Gohir.D07G110600
10kb_07vs16_downregulated_SNPs	i23014Gh	D07	15365648	Gohir.D07G110800
10kb_07vs16_downregulated_SNPs	i26191Gh	D07	15367749	Gohir.D07G110800
10kb_07vs16_downregulated_SNPs	i01795Gh	D07	20579163	Gohir.D07G131100
10kb_07vs16_downregulated_SNPs	i25985Gh	D07	32512152	Gohir.D07G166500
10kb_07vs16_downregulated_SNPs	i31772Gh	D07	32517882	Gohir.D07G166500
10kb_07vs16_downregulated_SNPs	i45068Gh	D07	45022708	Gohir.D07G183500
10kb_07vs16_downregulated_SNPs	i03735Gh	D08	756479	Gohir.D08G009700
10kb_07vs16_downregulated_SNPs	i03736Gh	D08	761195	Gohir.D08G009700
10kb_07vs16_downregulated_SNPs	i03748Gh	D08	817272	Gohir.D08G010800
10kb_07vs16_downregulated_SNPs	i03819Gh	D08	2258627	Gohir.D08G025000
10kb_07vs16_downregulated_SNPs	i03820Gh	D08	2264592	Gohir.D08G025000
10kb_07vs16_downregulated_SNPs	i03910Gh	D08	4269346	Gohir.D08G041700
10kb_07vs16_downregulated_SNPs	i03911Gh	D08	4280826	Gohir.D08G041700
10kb_07vs16_downregulated_SNPs	i03990Gh	D08	6407375	Gohir.D08G056900
10kb_07vs16_downregulated_SNPs	i03992Gh	D08	6413113	Gohir.D08G056900
10kb_07vs16_downregulated_SNPs	i15040Gh	D08	6413352	Gohir.D08G056900
10kb_07vs16_downregulated_SNPs	i03993Gh	D08	6413924	Gohir.D08G056900
10kb_07vs16_downregulated_SNPs	i47680Gh	D08	7179919	Gohir.D08G061900
10kb_07vs16_downregulated_SNPs	i04604Gh	D08	63333670	Gohir.D08G214600
10kb_07vs16_downregulated_SNPs	i28370Gh	D09	3196681	Gohir.D09G013100
10kb_07vs16_downregulated_SNPs	i06236Gh	D09	43357654	Gohir.D09G141500
10kb_07vs16_downregulated_SNPs	i15762Gh	D09	43358161	Gohir.D09G141500
10kb_07vs16_downregulated_SNPs	i06238Gh	D09	43361911	Gohir.D09G141500
10kb_07vs16_downregulated_SNPs	i39495Gh	D09	45146704	Gohir.D09G158200
10kb_07vs16_downregulated_SNPs	i00209Gh	D09	45156115	Gohir.D09G158200
10kb_07vs16_downregulated_SNPs	i06346Gh	D09	45156497	Gohir.D09G158200
10kb_07vs16_downregulated_SNPs	i25466Gh	D09	45162473	Gohir.D09G158200
10kb_07vs16_downregulated_SNPs	i15814Gh	D09	48852840	Gohir.D09G196000
10kb_07vs16_downregulated_SNPs	i06614Gh	D09	51918436	Gohir.D09G230100
10kb_07vs16_downregulated_SNPs	i11532Gh	D10	1444870	Gohir.D10G016700
10kb_07vs16_downregulated_SNPs	i17414Gh	D10	1454392	Gohir.D10G016700
10kb_07vs16_downregulated_SNPs	i39228Gh	D10	3207196	Gohir.D10G036700
10kb_07vs16_downregulated_SNPs	i11595Gh	D10	3220375	Gohir.D10G036700
10kb_07vs16_downregulated_SNPs	i11618Gh	D10	3513252	Gohir.D10G040300
10kb_07vs16_downregulated_SNPs	i11647Gh	D10	4573446	Gohir.D10G049500
10kb_07vs16_downregulated_SNPs	i40193Gh	D10	5810992	Gohir.D10G059500
10kb_07vs16_downregulated_SNPs	i11708Gh	D10	6074477	Gohir.D10G061400
10kb_07vs16_downregulated_SNPs	i52607Gb	D10	6074804	Gohir.D10G061400
10kb_07vs16_downregulated_SNPs	i43419Gh	D10	6817963	Gohir.D10G066100
10kb_07vs16_downregulated_SNPs	i22885Gh	D10	8946449	Gohir.D10G075500
10kb_07vs16_downregulated_SNPs	i11773Gh	D10	9184844	Gohir.D10G076500
10kb_07vs16_downregulated_SNPs	i17467Gh	D10	9185645	Gohir.D10G076500
10kb_07vs16_downregulated_SNPs	i11775Gh	D10	9185816	Gohir.D10G076500
10kb_07vs16_downregulated_SNPs	i29527Gh	D10	12227707	Gohir.D10G090100
10kb_07vs16_downregulated_SNPs	i12076Gh	D10	53948453	Gohir.D10G183200
10kb_07vs16_downregulated_SNPs	i60613Gb	D10	53952055	Gohir.D10G183200
10kb_07vs16_downregulated_SNPs	i32299Gh	D10	62151854	Gohir.D10G218400
10kb_07vs16_downregulated_SNPs	i15896Gh	D11	1693954	Gohir.D11G018400
10kb_07vs16_downregulated_SNPs	i06827Gh	D11	3374707	Gohir.D11G039900
10kb_07vs16_downregulated_SNPs	i06910Gh	D11	5572907	Gohir.D11G063600
10kb_07vs16_downregulated_SNPs	i47034Gh	D11	5935514	Gohir.D11G069100
10kb_07vs16_downregulated_SNPs	i15948Gh	D11	6602677	Gohir.D11G076900
10kb_07vs16_downregulated_SNPs	i07094Gh	D11	12384847	Gohir.D11G126900
10kb_07vs16_downregulated_SNPs	i07101Gh	D11	12729925	Gohir.D11G130000
10kb_07vs16_downregulated_SNPs	i00284Gh	D11	59143095	Gohir.D11G263900
10kb_07vs16_downregulated_SNPs	i07446Gh	D11	59148982	Gohir.D11G263900
10kb_07vs16_downregulated_SNPs	i24167Gh	D12	4859527	Gohir.D12G035600
10kb_07vs16_downregulated_SNPs	i42545Gh	D12	4861393	Gohir.D12G035600
10kb_07vs16_downregulated_SNPs	i21342Gh	D12	4863654	Gohir.D12G035600
10kb_07vs16_downregulated_SNPs	i35737Gh	D12	4863654	Gohir.D12G035600
10kb_07vs16_downregulated_SNPs	i14118Gh	D12	4870424	Gohir.D12G035600
10kb_07vs16_downregulated_SNPs	i31641Gh	D12	45624868	Gohir.D12G136500
10kb_07vs16_downregulated_SNPs	i08659Gh	D12	60967587	Gohir.D12G247500
10kb_07vs16_downregulated_SNPs	i13037Gh	D13	2295560	Gohir.D13G022100
10kb_07vs16_downregulated_SNPs	i39147Gh	D13	47560134	Gohir.D13G135900
10kb_07vs16_downregulated_SNPs	i37263Gh	D13	48198805	Gohir.D13G137500
10kb_07vs16_downregulated_SNPs	i33564Gh	D13	49405262	Gohir.D13G140100
10kb_07vs16_downregulated_SNPs	i20351Gh	D13	55791089	Gohir.D13G166500
10kb_07vs16_downregulated_SNPs	i18044Gh	D13	55803413	Gohir.D13G166500

## Sheet: 16vs25_SNPs
comparison	ID	chromosome	location_coordinate	gene ID
exact_16vs25_upregulated_SNPs	i47972Gh	A01	12375043	Gohir.A01G080600
exact_16vs25_upregulated_SNPs	i36727Gh	A01	93599509	Gohir.A01G173700
exact_16vs25_upregulated_SNPs	i38618Gh	A03	6920467	Gohir.A03G038200
exact_16vs25_upregulated_SNPs	i42053Gh	A03	9042776	Gohir.A03G047100
exact_16vs25_upregulated_SNPs	i05560Gh	A03	106813180	Gohir.A03G194300
exact_16vs25_upregulated_SNPs	i29674Gh	A05	2703390	Gohir.A05G027000
exact_16vs25_upregulated_SNPs	i21675Gh	A05	93363990	Gohir.A05G376700
exact_16vs25_upregulated_SNPs	i38376Gh	A05	93376072	Gohir.A05G376700
exact_16vs25_upregulated_SNPs	i14223Gh	A06	3874026	Gohir.A06G031600
exact_16vs25_upregulated_SNPs	i11331Gh	A06	120621675	Gohir.A06G200200
exact_16vs25_upregulated_SNPs	i28878Gh	A08	6522533	Gohir.A08G049700
exact_16vs25_upregulated_SNPs	i60714Gt	A08	121016150	Gohir.A08G224400
exact_16vs25_upregulated_SNPs	i00903Gh	A09	72531111	Gohir.A09G151700
exact_16vs25_upregulated_SNPs	i15850Gh	A09	79778001	Gohir.A09G225500
exact_16vs25_upregulated_SNPs	i29466Gh	A10	104289650	Gohir.A10G202600
exact_16vs25_upregulated_SNPs	i00397Gh	A11	13781670	Gohir.A11G124500
exact_16vs25_upregulated_SNPs	i43666Gh	A12	95293414	Gohir.A12G199500
exact_16vs25_upregulated_SNPs	i30955Gh	A13	6136330	Gohir.A13G046200
exact_16vs25_upregulated_SNPs	i13403Gh	A13	88846198	Gohir.A13G142600
exact_16vs25_upregulated_SNPs	i02434Gh	D01	8636076	Gohir.D01G060700
exact_16vs25_upregulated_SNPs	i14623Gh	D01	8638149	Gohir.D01G060700
exact_16vs25_upregulated_SNPs	i02674Gh	D01	42155200	Gohir.D01G136400
exact_16vs25_upregulated_SNPs	i13983Gh	D01	61037018	Gohir.D01G191900
exact_16vs25_upregulated_SNPs	i14752Gh	D01	61037259	Gohir.D01G191900
exact_16vs25_upregulated_SNPs	i45229Gh	D02	55785164	Gohir.D02G150100
exact_16vs25_upregulated_SNPs	i48333Gh	D02	61180464	Gohir.D02G166900
exact_16vs25_upregulated_SNPs	i19018Gh	D02	61181947	Gohir.D02G166900
exact_16vs25_upregulated_SNPs	i42752Gh	D05	6444473	Gohir.D05G077000
exact_16vs25_upregulated_SNPs	i09234Gh	D05	9063090	Gohir.D05G105700
exact_16vs25_upregulated_SNPs	i09390Gh	D05	12641387	Gohir.D05G142800
exact_16vs25_upregulated_SNPs	i09472Gh	D05	13852394	Gohir.D05G155500
exact_16vs25_upregulated_SNPs	i09605Gh	D05	18569535	Gohir.D05G206100
exact_16vs25_upregulated_SNPs	i16784Gh	D05	25245909	Gohir.D05G258200
exact_16vs25_upregulated_SNPs	i10017Gh	D05	30743550	Gohir.D05G291000
exact_16vs25_upregulated_SNPs	i64008Gm	D06	3193563	Gohir.D06G027600
exact_16vs25_upregulated_SNPs	i50575Gb	D06	3193592	Gohir.D06G027600
exact_16vs25_upregulated_SNPs	i53223Gb	D06	3193884	Gohir.D06G027600
exact_16vs25_upregulated_SNPs	i01303Gh	D07	1308787	Gohir.D07G011400
exact_16vs25_upregulated_SNPs	i01304Gh	D07	1309061	Gohir.D07G011400
exact_16vs25_upregulated_SNPs	i01305Gh	D07	1309216	Gohir.D07G011400
exact_16vs25_upregulated_SNPs	i01306Gh	D07	1309420	Gohir.D07G011400
exact_16vs25_upregulated_SNPs	i01307Gh	D07	1309942	Gohir.D07G011400
exact_16vs25_upregulated_SNPs	i13940Gh	D07	1310072	Gohir.D07G011400
exact_16vs25_upregulated_SNPs	i03961Gh	D08	5413073	Gohir.D08G050700
exact_16vs25_upregulated_SNPs	i32640Gh	D08	34604670	Gohir.D08G113100
exact_16vs25_upregulated_SNPs	i15211Gh	D08	64133621	Gohir.D08G219400
exact_16vs25_upregulated_SNPs	i15212Gh	D08	64133685	Gohir.D08G219400
exact_16vs25_upregulated_SNPs	i21196Gh	D09	35415030	Gohir.D09G089100
exact_16vs25_upregulated_SNPs	i48361Gh	D12	44820679	Gohir.D12G130500
exact_16vs25_upregulated_SNPs	i08220Gh	D12	49692460	Gohir.D12G155800
exact_16vs25_upregulated_SNPs	i14228Gh	D13	57759892	Gohir.D13G178700
exact_16vs25_downregulated_SNPs	i28291Gh	A01	102274849	Gohir.A01G214800
exact_16vs25_downregulated_SNPs	i46853Gh	A01	102450507	Gohir.A01G216400
exact_16vs25_downregulated_SNPs	i40448Gh	A04	47723251	Gohir.A04G065400
exact_16vs25_downregulated_SNPs	i21607Gh	A05	3139538	Gohir.A05G031700
exact_16vs25_downregulated_SNPs	i12654Gh	A05	95003585	Gohir.A05G382400
exact_16vs25_downregulated_SNPs	i04708Gh	A08	120028064	Gohir.A08G217000
exact_16vs25_downregulated_SNPs	i11810Gh	A10	20404333	Gohir.A10G098900
exact_16vs25_downregulated_SNPs	i17505Gh	A10	75010654	Gohir.A10G143900
exact_16vs25_downregulated_SNPs	i27166Gh	A10	99007917	Gohir.A10G185200
exact_16vs25_downregulated_SNPs	i44459Gh	A13	87548242	Gohir.A13G137700
exact_16vs25_downregulated_SNPs	i37557Gh	A13	87549317	Gohir.A13G137700
exact_16vs25_downregulated_SNPs	i02405Gh	D01	6625675	Gohir.D01G052700
exact_16vs25_downregulated_SNPs	i03096Gh	D03	545263	Gohir.D03G007600
exact_16vs25_downregulated_SNPs	i03218Gh	D03	3986981	Gohir.D03G034600
exact_16vs25_downregulated_SNPs	i00705Gh	D03	44824617	Gohir.D03G124600
exact_16vs25_downregulated_SNPs	i18569Gh	D03	44824769	Gohir.D03G124600
exact_16vs25_downregulated_SNPs	i14920Gh	D03	48354701	Gohir.D03G142400
exact_16vs25_downregulated_SNPs	i14921Gh	D03	48357045	Gohir.D03G142400
exact_16vs25_downregulated_SNPs	i08844Gh	D05	2039782	Gohir.D05G022100
exact_16vs25_downregulated_SNPs	i08845Gh	D05	2039988	Gohir.D05G022100
exact_16vs25_downregulated_SNPs	i08893Gh	D05	2889054	Gohir.D05G033100
exact_16vs25_downregulated_SNPs	i08894Gh	D05	2891374	Gohir.D05G033100
exact_16vs25_downregulated_SNPs	i32389Gh	D05	17405300	Gohir.D05G192900
exact_16vs25_downregulated_SNPs	i10584Gh	D06	1135639	Gohir.D06G011300
exact_16vs25_downregulated_SNPs	i10718Gh	D06	2733489	Gohir.D06G025000
exact_16vs25_downregulated_SNPs	i10719Gh	D06	2733735	Gohir.D06G025000
exact_16vs25_downregulated_SNPs	i60680Gb	D06	65294405	Gohir.D06G190100
exact_16vs25_downregulated_SNPs	i49047Gh	D08	50452592	Gohir.D08G149000
exact_16vs25_downregulated_SNPs	i24726Gh	D10	11775933	Gohir.D10G088000
exact_16vs25_downregulated_SNPs	i07354Gh	D11	28589850	Gohir.D11G208200
exact_16vs25_downregulated_SNPs	i16194Gh	D11	71576869	Gohir.D11G331500
exact_16vs25_downregulated_SNPs	i08622Gh	D12	60172184	Gohir.D12G238600
exact_16vs25_downregulated_SNPs	i08631Gh	D12	60494882	Gohir.D12G242100
exact_16vs25_downregulated_SNPs	i45991Gh	D13	56110416	Gohir.D13G167600
exact_16vs25_downregulated_SNPs	i41786Gh	D13	60995514	Gohir.D13G205500
exact_16vs25_downregulated_SNPs	i13812Gh	D13	62554533	Gohir.D13G216700
1kb_16vs25_upregulated_SNPs	i44545Gh	A03	7212594	Gohir.A03G039500
1kb_16vs25_upregulated_SNPs	i55510Gb	A05	14556333	Gohir.A05G150500
1kb_16vs25_upregulated_SNPs	i26271Gh	A05	15432372	Gohir.A05G158600
1kb_16vs25_upregulated_SNPs	i29279Gh	A05	87383003	Gohir.A05G355800
1kb_16vs25_upregulated_SNPs	i25053Gh	A05	95365485	Gohir.A05G384300
1kb_16vs25_upregulated_SNPs	i42454Gh	A07	15849447	Gohir.A07G095000
1kb_16vs25_upregulated_SNPs	i44304Gh	A07	27728128	Gohir.A07G132300
1kb_16vs25_upregulated_SNPs	i30504Gh	A09	71304551	Gohir.A09G143900
1kb_16vs25_upregulated_SNPs	i24912Gh	A11	196088	Gohir.A11G001700
1kb_16vs25_upregulated_SNPs	i52906Gb	D01	61038294	Gohir.D01G191900
1kb_16vs25_upregulated_SNPs	i52932Gb	D01	61038294	Gohir.D01G191900
1kb_16vs25_upregulated_SNPs	i61359Gt	D01	61038294	Gohir.D01G191900
1kb_16vs25_upregulated_SNPs	i04952Gh	D02	2679681	Gohir.D02G020100
1kb_16vs25_upregulated_SNPs	i05024Gh	D02	4569502	Gohir.D02G035800
1kb_16vs25_upregulated_SNPs	i05025Gh	D02	4574422	Gohir.D02G035800
1kb_16vs25_upregulated_SNPs	i05698Gh	D02	68163328	Gohir.D02G207200
1kb_16vs25_upregulated_SNPs	i03434Gh	D03	44486004	Gohir.D03G122700
1kb_16vs25_upregulated_SNPs	i09138Gh	D05	6935462	Gohir.D05G082200
1kb_16vs25_upregulated_SNPs	i09231Gh	D05	9032256	Gohir.D05G105200
1kb_16vs25_upregulated_SNPs	i09236Gh	D05	9063686	Gohir.D05G105700
1kb_16vs25_upregulated_SNPs	i10543Gh	D06	667787	Gohir.D06G007100
1kb_16vs25_upregulated_SNPs	i17083Gh	D06	774102	Gohir.D06G007900
1kb_16vs25_upregulated_SNPs	i00428Gh	D06	27249767	Gohir.D06G108300
1kb_16vs25_upregulated_SNPs	i01302Gh	D07	1308247	Gohir.D07G011400
1kb_16vs25_upregulated_SNPs	i00985Gh	D07	1310836	Gohir.D07G011400
1kb_16vs25_upregulated_SNPs	i14296Gh	D07	1311124	Gohir.D07G011400
1kb_16vs25_upregulated_SNPs	i01383Gh	D07	3164720	Gohir.D07G029200
1kb_16vs25_upregulated_SNPs	i04392Gh	D08	53285169	Gohir.D08G162900
1kb_16vs25_upregulated_SNPs	i06518Gh	D09	49687457	Gohir.D09G205500
1kb_16vs25_upregulated_SNPs	i47709Gh	D10	1175083	Gohir.D10G013700
1kb_16vs25_upregulated_SNPs	i42676Gh	D11	2509828	Gohir.D11G028900
1kb_16vs25_upregulated_SNPs	i07328Gh	D11	24425579	Gohir.D11G196600
1kb_16vs25_upregulated_SNPs	i48361Gh	D12	44820679	Gohir.D12G130500
1kb_16vs25_upregulated_SNPs	i41619Gh	D13	49270504	Gohir.D13G139300
1kb_16vs25_downregulated_SNPs	i41324Gh	A01	4699417	Gohir.A01G043100
1kb_16vs25_downregulated_SNPs	i21057Gh	A01	102275701	Gohir.A01G214800
1kb_16vs25_downregulated_SNPs	i26677Gh	A03	4551855	Gohir.A03G028400
1kb_16vs25_downregulated_SNPs	i09498Gh	A05	16498160	Gohir.A05G167300
1kb_16vs25_downregulated_SNPs	i41895Gh	A09	3365387	Gohir.A09G013700
1kb_16vs25_downregulated_SNPs	i46942Gh	A11	107658726	Gohir.A11G288400
1kb_16vs25_downregulated_SNPs	i32292Gh	D01	38928176	Gohir.D01G132700
1kb_16vs25_downregulated_SNPs	i19075Gh	D02	69042716	Gohir.D02G216900
1kb_16vs25_downregulated_SNPs	i05743Gh	D02	69213732	Gohir.D02G218600
1kb_16vs25_downregulated_SNPs	i15617Gh	D02	69596893	Gohir.D02G223900
1kb_16vs25_downregulated_SNPs	i45743Gh	D03	31328523	Gohir.D03G082100
1kb_16vs25_downregulated_SNPs	i03519Gh	D03	48358125	Gohir.D03G142400
1kb_16vs25_downregulated_SNPs	i12659Gh	D04	11715994	Gohir.D04G063800
1kb_16vs25_downregulated_SNPs	i12824Gh	D04	52240178	Gohir.D04G155400
1kb_16vs25_downregulated_SNPs	i19557Gh	D05	9247618	Gohir.D05G108300
1kb_16vs25_downregulated_SNPs	i16720Gh	D05	17408833	Gohir.D05G192900
1kb_16vs25_downregulated_SNPs	i16721Gh	D05	17408902	Gohir.D05G192900
1kb_16vs25_downregulated_SNPs	i60860Gt	D05	26003154	Gohir.D05G265000
1kb_16vs25_downregulated_SNPs	i09859Gh	D05	26003266	Gohir.D05G265000
1kb_16vs25_downregulated_SNPs	i10651Gh	D06	2000207	Gohir.D06G019100
1kb_16vs25_downregulated_SNPs	i23331Gh	D07	20363367	Gohir.D07G130200
1kb_16vs25_downregulated_SNPs	i66427Ga	D08	668331	Gohir.D08G008200
1kb_16vs25_downregulated_SNPs	i44918Gh	D08	32453327	Gohir.D08G110100
1kb_16vs25_downregulated_SNPs	i21442Gh	D08	32456091	Gohir.D08G110100
1kb_16vs25_downregulated_SNPs	i06239Gh	D09	43370073	Gohir.D09G141700
1kb_16vs25_downregulated_SNPs	i11500Gh	D10	1110845	Gohir.D10G012800
1kb_16vs25_downregulated_SNPs	i17414Gh	D10	1454392	Gohir.D10G017000
1kb_16vs25_downregulated_SNPs	i15886Gh	D11	1364141	Gohir.D11G014800
1kb_16vs25_downregulated_SNPs	i15887Gh	D11	1364212	Gohir.D11G014800
1kb_16vs25_downregulated_SNPs	i06790Gh	D11	2380464	Gohir.D11G027300
1kb_16vs25_downregulated_SNPs	i07163Gh	D11	14412515	Gohir.D11G142800
1kb_16vs25_downregulated_SNPs	i07879Gh	D12	4108660	Gohir.D12G031800
1kb_16vs25_downregulated_SNPs	i08084Gh	D12	43150216	Gohir.D12G121200
1kb_16vs25_downregulated_SNPs	i57557Gb	D12	51698859	Gohir.D12G168800
1kb_16vs25_downregulated_SNPs	i08621Gh	D12	60170971	Gohir.D12G238600
1kb_16vs25_downregulated_SNPs	i08630Gh	D12	60494178	Gohir.D12G242100
1kb_16vs25_downregulated_SNPs	i08714Gh	D12	61755728	Gohir.D12G255300
1kb_16vs25_downregulated_SNPs	i13805Gh	D13	62493270	Gohir.D13G216400
10kb_16vs25_upregulated_SNPs	i33757Gh	A01	503513	Gohir.A01G005800
10kb_16vs25_upregulated_SNPs	i32139Gh	A01	99673971	Gohir.A01G199700
10kb_16vs25_upregulated_SNPs	i21744Gh	A01	103826672	Gohir.A01G229900
10kb_16vs25_upregulated_SNPs	i22043Gh	A02	4959212	Gohir.A02G038200
10kb_16vs25_upregulated_SNPs	i30467Gh	A02	4959299	Gohir.A02G038200
10kb_16vs25_upregulated_SNPs	i29741Gh	A03	7214651	Gohir.A03G039500
10kb_16vs25_upregulated_SNPs	i23798Gh	A03	35741178	Gohir.A03G087900
10kb_16vs25_upregulated_SNPs	i33642Gh	A03	104712973	Gohir.A03G177000
10kb_16vs25_upregulated_SNPs	i23457Gh	A03	105897051	Gohir.A03G186400
10kb_16vs25_upregulated_SNPs	i12800Gh	A04	80165138	Gohir.A04G127000
10kb_16vs25_upregulated_SNPs	i00135Gh	A04	80188692	Gohir.A04G127300
10kb_16vs25_upregulated_SNPs	i50654Gb	A05	1764388	Gohir.A05G017700
10kb_16vs25_upregulated_SNPs	i27817Gh	A05	2069694	Gohir.A05G021300
10kb_16vs25_upregulated_SNPs	i16547Gh	A05	3076896	Gohir.A05G031100
10kb_16vs25_upregulated_SNPs	i52913Gb	A05	6056670	Gohir.A05G064100
10kb_16vs25_upregulated_SNPs	i19552Gh	A05	8477676	Gohir.A05G090100
10kb_16vs25_upregulated_SNPs	i35064Gh	A05	10123280	Gohir.A05G108900
10kb_16vs25_upregulated_SNPs	i26271Gh	A05	15432372	Gohir.A05G158600
10kb_16vs25_upregulated_SNPs	i00260Gh	A05	18227999	Gohir.A05G185900
10kb_16vs25_upregulated_SNPs	i00321Gh	A05	22450271	Gohir.A05G221500
10kb_16vs25_upregulated_SNPs	i40748Gh	A05	22600390	Gohir.A05G222700
10kb_16vs25_upregulated_SNPs	i09878Gh	A05	29275761	Gohir.A05G262600
10kb_16vs25_upregulated_SNPs	i27980Gh	A05	96004562	Gohir.A05G387900
10kb_16vs25_upregulated_SNPs	i39835Gh	A05	96012851	Gohir.A05G387900
10kb_16vs25_upregulated_SNPs	i66040Ga	A06	83672	Gohir.A06G001400
10kb_16vs25_upregulated_SNPs	i52593Gb	A06	83960	Gohir.A06G001400
10kb_16vs25_upregulated_SNPs	i00283Gh	A06	1130277	Gohir.A06G012400
10kb_16vs25_upregulated_SNPs	i61054Gt	A06	1705299	Gohir.A06G017400
10kb_16vs25_upregulated_SNPs	i21845Gh	A06	14217968	Gohir.A06G062800
10kb_16vs25_upregulated_SNPs	i11331Gh	A06	120621675	Gohir.A06G200200
10kb_16vs25_upregulated_SNPs	i36253Gh	A06	121127578	Gohir.A06G207500
10kb_16vs25_upregulated_SNPs	i40832Gh	A06	121159089	Gohir.A06G208000
10kb_16vs25_upregulated_SNPs	i50640Gb	A07	1361394	Gohir.A07G011600
10kb_16vs25_upregulated_SNPs	i64291Gm	A07	4720643	Gohir.A07G038300
10kb_16vs25_upregulated_SNPs	i34983Gh	A07	10691231	Gohir.A07G075900
10kb_16vs25_upregulated_SNPs	i39888Gh	A07	10712054	Gohir.A07G075900
10kb_16vs25_upregulated_SNPs	i26935Gh	A07	22482424	Gohir.A07G117300
10kb_16vs25_upregulated_SNPs	i37231Gh	A07	23084736	Gohir.A07G119600
10kb_16vs25_upregulated_SNPs	i27877Gh	A07	25003915	Gohir.A07G124600
10kb_16vs25_upregulated_SNPs	i26814Gh	A07	25021051	Gohir.A07G124600
10kb_16vs25_upregulated_SNPs	i38771Gh	A07	43002719	Gohir.A07G154700
10kb_16vs25_upregulated_SNPs	i47607Gh	A08	106803006	Gohir.A08G151300
10kb_16vs25_upregulated_SNPs	i39186Gh	A08	117732525	Gohir.A08G199000
10kb_16vs25_upregulated_SNPs	i36005Gh	A09	53997505	Gohir.A09G065100
10kb_16vs25_upregulated_SNPs	i40112Gh	A09	67658129	Gohir.A09G121400
10kb_16vs25_upregulated_SNPs	i30504Gh	A09	71304551	Gohir.A09G143900
10kb_16vs25_upregulated_SNPs	i31170Gh	A09	73513329	Gohir.A09G162900
10kb_16vs25_upregulated_SNPs	i06405Gh	A09	75560649	Gohir.A09G180900
10kb_16vs25_upregulated_SNPs	i06448Gh	A09	76590184	Gohir.A09G191400
10kb_16vs25_upregulated_SNPs	i06449Gh	A09	76591238	Gohir.A09G191400
10kb_16vs25_upregulated_SNPs	i00880Gh	A09	76592035	Gohir.A09G191800
10kb_16vs25_upregulated_SNPs	i19251Gh	A09	81620018	Gohir.A09G246000
10kb_16vs25_upregulated_SNPs	i68116Gl	A09	81627875	Gohir.A09G246000
10kb_16vs25_upregulated_SNPs	i45520Gh	A10	4289365	Gohir.A10G044500
10kb_16vs25_upregulated_SNPs	i63442Gm	A10	5686561	Gohir.A10G054300
10kb_16vs25_upregulated_SNPs	i63736Gm	A10	6066761	Gohir.A10G056200
10kb_16vs25_upregulated_SNPs	i46696Gh	A10	8872416	Gohir.A10G067700
10kb_16vs25_upregulated_SNPs	i51387Gb	A10	108600461	Gohir.A10G221100
10kb_16vs25_upregulated_SNPs	i06675Gh	A11	702072	Gohir.A11G007400
10kb_16vs25_upregulated_SNPs	i00366Gh	A11	709658	Gohir.A11G007400
10kb_16vs25_upregulated_SNPs	i00202Gh	A11	5817255	Gohir.A11G062800
10kb_16vs25_upregulated_SNPs	i50525Gb	A11	11137000	Gohir.A11G107800
10kb_16vs25_upregulated_SNPs	i00397Gh	A11	13781670	Gohir.A11G124500
10kb_16vs25_upregulated_SNPs	i20872Gh	A11	16078364	Gohir.A11G138300
10kb_16vs25_upregulated_SNPs	i00983Gh	A11	17815677	Gohir.A11G147100
10kb_16vs25_upregulated_SNPs	i00606Gh	A11	23959241	Gohir.A11G171900
10kb_16vs25_upregulated_SNPs	i22525Gh	A11	98368628	Gohir.A11G251300
10kb_16vs25_upregulated_SNPs	i32352Gh	A12	75947549	Gohir.A12G114900
10kb_16vs25_upregulated_SNPs	i24324Gh	A12	76678390	Gohir.A12G116700
10kb_16vs25_upregulated_SNPs	i39087Gh	A12	93076743	Gohir.A12G186500
10kb_16vs25_upregulated_SNPs	i43666Gh	A12	95293414	Gohir.A12G199500
10kb_16vs25_upregulated_SNPs	i45982Gh	A13	54198138	Gohir.A13G094800
10kb_16vs25_upregulated_SNPs	i32205Gh	A13	54202614	Gohir.A13G094800
10kb_16vs25_upregulated_SNPs	i24916Gh	A13	68343934	Gohir.A13G107000
10kb_16vs25_upregulated_SNPs	i45252Gh	A13	75649550	Gohir.A13G117000
10kb_16vs25_upregulated_SNPs	i02208Gh	D01	824062	Gohir.D01G009200
10kb_16vs25_upregulated_SNPs	i18370Gh	D01	824760	Gohir.D01G009200
10kb_16vs25_upregulated_SNPs	i02209Gh	D01	824840	Gohir.D01G009200
10kb_16vs25_upregulated_SNPs	i02243Gh	D01	1542567	Gohir.D01G017500
10kb_16vs25_upregulated_SNPs	i47184Gh	D01	9671128	Gohir.D01G066300
10kb_16vs25_upregulated_SNPs	i34643Gh	D01	21194248	Gohir.D01G109700
10kb_16vs25_upregulated_SNPs	i36244Gh	D01	38194953	Gohir.D01G131800
10kb_16vs25_upregulated_SNPs	i30341Gh	D01	39388638	Gohir.D01G133300
10kb_16vs25_upregulated_SNPs	i33133Gh	D01	39402770	Gohir.D01G133300
10kb_16vs25_upregulated_SNPs	i02681Gh	D01	41047960	Gohir.D01G134500
10kb_16vs25_upregulated_SNPs	i02680Gh	D01	41048730	Gohir.D01G134500
10kb_16vs25_upregulated_SNPs	i02677Gh	D01	41849562	Gohir.D01G135500
10kb_16vs25_upregulated_SNPs	i02674Gh	D01	42155200	Gohir.D01G136400
10kb_16vs25_upregulated_SNPs	i30908Gh	D01	44482297	Gohir.D01G140900
10kb_16vs25_upregulated_SNPs	i02702Gh	D01	44484746	Gohir.D01G140900
10kb_16vs25_upregulated_SNPs	i02703Gh	D01	44487557	Gohir.D01G140900
10kb_16vs25_upregulated_SNPs	i14700Gh	D01	46027560	Gohir.D01G143700
10kb_16vs25_upregulated_SNPs	i02882Gh	D01	59353580	Gohir.D01G181700
10kb_16vs25_upregulated_SNPs	i02928Gh	D01	61034549	Gohir.D01G191900
10kb_16vs25_upregulated_SNPs	i15341Gh	D02	2671933	Gohir.D02G020100
10kb_16vs25_upregulated_SNPs	i15343Gh	D02	2672284	Gohir.D02G020100
10kb_16vs25_upregulated_SNPs	i15344Gh	D02	2672365	Gohir.D02G020100
10kb_16vs25_upregulated_SNPs	i15345Gh	D02	2672461	Gohir.D02G020100
10kb_16vs25_upregulated_SNPs	i04950Gh	D02	2672953	Gohir.D02G020100
10kb_16vs25_upregulated_SNPs	i15347Gh	D02	2674750	Gohir.D02G020100
10kb_16vs25_upregulated_SNPs	i05022Gh	D02	4567131	Gohir.D02G035800
10kb_16vs25_upregulated_SNPs	i05038Gh	D02	4887483	Gohir.D02G038400
10kb_16vs25_upregulated_SNPs	i05039Gh	D02	4887766	Gohir.D02G038400
10kb_16vs25_upregulated_SNPs	i15373Gh	D02	4888000	Gohir.D02G038400
10kb_16vs25_upregulated_SNPs	i05060Gh	D02	5958083	Gohir.D02G046600
10kb_16vs25_upregulated_SNPs	i05086Gh	D02	6744649	Gohir.D02G052100
10kb_16vs25_upregulated_SNPs	i05087Gh	D02	6745120	Gohir.D02G052100
10kb_16vs25_upregulated_SNPs	i05090Gh	D02	6748976	Gohir.D02G052100
10kb_16vs25_upregulated_SNPs	i05105Gh	D02	7730173	Gohir.D02G056600
10kb_16vs25_upregulated_SNPs	i45229Gh	D02	55785164	Gohir.D02G150100
10kb_16vs25_upregulated_SNPs	i25165Gh	D02	55794175	Gohir.D02G150100
10kb_16vs25_upregulated_SNPs	i25181Gh	D02	55947289	Gohir.D02G150800
10kb_16vs25_upregulated_SNPs	i19038Gh	D02	63584399	Gohir.D02G176600
10kb_16vs25_upregulated_SNPs	i05645Gh	D02	67326294	Gohir.D02G200400
10kb_16vs25_upregulated_SNPs	i05647Gh	D02	67331884	Gohir.D02G200400
10kb_16vs25_upregulated_SNPs	i05648Gh	D02	67332268	Gohir.D02G200400
10kb_16vs25_upregulated_SNPs	i05687Gh	D02	67949412	Gohir.D02G205100
10kb_16vs25_upregulated_SNPs	i05692Gh	D02	68022480	Gohir.D02G206200
10kb_16vs25_upregulated_SNPs	i05694Gh	D02	68023387	Gohir.D02G206200
10kb_16vs25_upregulated_SNPs	i03212Gh	D03	3601798	Gohir.D03G032500
10kb_16vs25_upregulated_SNPs	i03262Gh	D03	10485405	Gohir.D03G055800
10kb_16vs25_upregulated_SNPs	i03435Gh	D03	44486699	Gohir.D03G122700
10kb_16vs25_upregulated_SNPs	i03436Gh	D03	44486951	Gohir.D03G122700
10kb_16vs25_upregulated_SNPs	i03437Gh	D03	44487155	Gohir.D03G122700
10kb_16vs25_upregulated_SNPs	i03477Gh	D03	46986826	Gohir.D03G134500
10kb_16vs25_upregulated_SNPs	i12409Gh	D04	1533714	Gohir.D04G011300
10kb_16vs25_upregulated_SNPs	i12411Gh	D04	1535191	Gohir.D04G011300
10kb_16vs25_upregulated_SNPs	i39528Gh	D04	10218744	Gohir.D04G058100
10kb_16vs25_upregulated_SNPs	i26050Gh	D04	51967720	Gohir.D04G152900
10kb_16vs25_upregulated_SNPs	i44683Gh	D04	51982613	Gohir.D04G152900
10kb_16vs25_upregulated_SNPs	i12832Gh	D04	52441759	Gohir.D04G156500
10kb_16vs25_upregulated_SNPs	i12849Gh	D04	52842450	Gohir.D04G160000
10kb_16vs25_upregulated_SNPs	i12859Gh	D04	53044377	Gohir.D04G161600
10kb_16vs25_upregulated_SNPs	i12897Gh	D04	53900174	Gohir.D04G169500
10kb_16vs25_upregulated_SNPs	i08796Gh	D05	760381	Gohir.D05G007200
10kb_16vs25_upregulated_SNPs	i08797Gh	D05	761500	Gohir.D05G007200
10kb_16vs25_upregulated_SNPs	i08798Gh	D05	766860	Gohir.D05G007200
10kb_16vs25_upregulated_SNPs	i44124Gh	D05	938126	Gohir.D05G009400
10kb_16vs25_upregulated_SNPs	i08943Gh	D05	3814614	Gohir.D05G045700
10kb_16vs25_upregulated_SNPs	i08978Gh	D05	4404545	Gohir.D05G052400
10kb_16vs25_upregulated_SNPs	i08996Gh	D05	4539710	Gohir.D05G053800
10kb_16vs25_upregulated_SNPs	i09003Gh	D05	4582065	Gohir.D05G054500
10kb_16vs25_upregulated_SNPs	i16593Gh	D05	5339486	Gohir.D05G064400
10kb_16vs25_upregulated_SNPs	i09139Gh	D05	6939619	Gohir.D05G082200
10kb_16vs25_upregulated_SNPs	i44267Gh	D05	9233997	Gohir.D05G107800
10kb_16vs25_upregulated_SNPs	i09315Gh	D05	11099478	Gohir.D05G127300
10kb_16vs25_upregulated_SNPs	i09389Gh	D05	12632800	Gohir.D05G142800
10kb_16vs25_upregulated_SNPs	i09467Gh	D05	13838820	Gohir.D05G155500
10kb_16vs25_upregulated_SNPs	i34935Gh	D05	14156791	Gohir.D05G158100
10kb_16vs25_upregulated_SNPs	i09480Gh	D05	14157763	Gohir.D05G158100
10kb_16vs25_upregulated_SNPs	i09486Gh	D05	14466186	Gohir.D05G161100
10kb_16vs25_upregulated_SNPs	i69754Gl	D05	14466952	Gohir.D05G161100
10kb_16vs25_upregulated_SNPs	i44080Gh	D05	16611832	Gohir.D05G185100
10kb_16vs25_upregulated_SNPs	i09549Gh	D05	17060848	Gohir.D05G190100
10kb_16vs25_upregulated_SNPs	i00462Gh	D05	18557375	Gohir.D05G206100
10kb_16vs25_upregulated_SNPs	i16730Gh	D05	18557515	Gohir.D05G206100
10kb_16vs25_upregulated_SNPs	i00461Gh	D05	18557591	Gohir.D05G206100
10kb_16vs25_upregulated_SNPs	i38854Gh	D05	19230218	Gohir.D05G213000
10kb_16vs25_upregulated_SNPs	i19575Gh	D05	19437865	Gohir.D05G214900
10kb_16vs25_upregulated_SNPs	i65919Ga	D05	19438153	Gohir.D05G214900
10kb_16vs25_upregulated_SNPs	i09672Gh	D05	19980577	Gohir.D05G219500
10kb_16vs25_upregulated_SNPs	i46600Gh	D05	21037637	Gohir.D05G227900
10kb_16vs25_upregulated_SNPs	i14173Gh	D05	25237064	Gohir.D05G258200
10kb_16vs25_upregulated_SNPs	i09849Gh	D05	25692917	Gohir.D05G261700
10kb_16vs25_upregulated_SNPs	i31337Gh	D05	25766396	Gohir.D05G262400
10kb_16vs25_upregulated_SNPs	i54746Gb	D05	25781875	Gohir.D05G262400
10kb_16vs25_upregulated_SNPs	i43120Gh	D05	29643866	Gohir.D05G285600
10kb_16vs25_upregulated_SNPs	i10311Gh	D05	55381225	Gohir.D05G343500
10kb_16vs25_upregulated_SNPs	i10321Gh	D05	55682601	Gohir.D05G343900
10kb_16vs25_upregulated_SNPs	i10445Gh	D05	60998575	Gohir.D05G367900
10kb_16vs25_upregulated_SNPs	i49170Gh	D06	311707	Gohir.D06G002900
10kb_16vs25_upregulated_SNPs	i10542Gh	D06	540091	Gohir.D06G005000
10kb_16vs25_upregulated_SNPs	i60789Gt	D06	676226	Gohir.D06G007100
10kb_16vs25_upregulated_SNPs	i10544Gh	D06	677018	Gohir.D06G007100
10kb_16vs25_upregulated_SNPs	i10545Gh	D06	677421	Gohir.D06G007100
10kb_16vs25_upregulated_SNPs	i17080Gh	D06	677766	Gohir.D06G007100
10kb_16vs25_upregulated_SNPs	i17081Gh	D06	677838	Gohir.D06G007100
10kb_16vs25_upregulated_SNPs	i10548Gh	D06	781473	Gohir.D06G007900
10kb_16vs25_upregulated_SNPs	i52559Gb	D06	1706451	Gohir.D06G016600
10kb_16vs25_upregulated_SNPs	i10624Gh	D06	1717367	Gohir.D06G016600
10kb_16vs25_upregulated_SNPs	i10625Gh	D06	1717473	Gohir.D06G016600
10kb_16vs25_upregulated_SNPs	i49729Gh	D06	1842588	Gohir.D06G018000
10kb_16vs25_upregulated_SNPs	i10728Gh	D06	3202145	Gohir.D06G027600
10kb_16vs25_upregulated_SNPs	i10729Gh	D06	3202332	Gohir.D06G027600
10kb_16vs25_upregulated_SNPs	i10730Gh	D06	3204095	Gohir.D06G027600
10kb_16vs25_upregulated_SNPs	i10799Gh	D06	5765578	Gohir.D06G040500
10kb_16vs25_upregulated_SNPs	i23207Gh	D06	24058192	Gohir.D06G101200
10kb_16vs25_upregulated_SNPs	i11242Gh	D06	58591246	Gohir.D06G155800
10kb_16vs25_upregulated_SNPs	i40650Gh	D06	64788170	Gohir.D06G188300
10kb_16vs25_upregulated_SNPs	i01285Gh	D07	556689	Gohir.D07G004800
10kb_16vs25_upregulated_SNPs	i00986Gh	D07	1311321	Gohir.D07G011400
10kb_16vs25_upregulated_SNPs	i01365Gh	D07	2680024	Gohir.D07G024400
10kb_16vs25_upregulated_SNPs	i01396Gh	D07	3544147	Gohir.D07G033400
10kb_16vs25_upregulated_SNPs	i23111Gh	D07	7602828	Gohir.D07G066300
10kb_16vs25_upregulated_SNPs	i14351Gh	D07	8808829	Gohir.D07G074900
10kb_16vs25_upregulated_SNPs	i01582Gh	D07	9333282	Gohir.D07G077900
10kb_16vs25_upregulated_SNPs	i01583Gh	D07	9337014	Gohir.D07G077900
10kb_16vs25_upregulated_SNPs	i01584Gh	D07	9337912	Gohir.D07G077900
10kb_16vs25_upregulated_SNPs	i01587Gh	D07	9338757	Gohir.D07G077900
10kb_16vs25_upregulated_SNPs	i01600Gh	D07	10432373	Gohir.D07G084400
10kb_16vs25_upregulated_SNPs	i01639Gh	D07	11729072	Gohir.D07G092300
10kb_16vs25_upregulated_SNPs	i01640Gh	D07	11729613	Gohir.D07G092300
10kb_16vs25_upregulated_SNPs	i21074Gh	D07	17911462	Gohir.D07G121700
10kb_16vs25_upregulated_SNPs	i46797Gh	D07	20861809	Gohir.D07G132300
10kb_16vs25_upregulated_SNPs	i29418Gh	D07	23685595	Gohir.D07G144700
10kb_16vs25_upregulated_SNPs	i29997Gh	D07	46391961	Gohir.D07G187200
10kb_16vs25_upregulated_SNPs	i24706Gh	D07	46393945	Gohir.D07G187200
10kb_16vs25_upregulated_SNPs	i32498Gh	D07	47310352	Gohir.D07G188900
10kb_16vs25_upregulated_SNPs	i44916Gh	D07	53876602	Gohir.D07G211900
10kb_16vs25_upregulated_SNPs	i03960Gh	D08	5404819	Gohir.D08G050700
10kb_16vs25_upregulated_SNPs	i03962Gh	D08	5420140	Gohir.D08G050700
10kb_16vs25_upregulated_SNPs	i23707Gh	D08	17804960	Gohir.D08G092200
10kb_16vs25_upregulated_SNPs	i38700Gh	D08	19246189	Gohir.D08G093900
10kb_16vs25_upregulated_SNPs	i04165Gh	D08	25453305	Gohir.D08G101000
10kb_16vs25_upregulated_SNPs	i15097Gh	D08	36864588	Gohir.D08G114900
10kb_16vs25_upregulated_SNPs	i35832Gh	D08	36876915	Gohir.D08G114900
10kb_16vs25_upregulated_SNPs	i33227Gh	D08	59728168	Gohir.D08G192100
10kb_16vs25_upregulated_SNPs	i04604Gh	D08	63333670	Gohir.D08G214600
10kb_16vs25_upregulated_SNPs	i15211Gh	D08	64133621	Gohir.D08G219400
10kb_16vs25_upregulated_SNPs	i15212Gh	D08	64133685	Gohir.D08G219400
10kb_16vs25_upregulated_SNPs	i06017Gh	D09	33142440	Gohir.D09G076200
10kb_16vs25_upregulated_SNPs	i06062Gh	D09	35407493	Gohir.D09G089100
10kb_16vs25_upregulated_SNPs	i21196Gh	D09	35415030	Gohir.D09G089100
10kb_16vs25_upregulated_SNPs	i19203Gh	D09	35422494	Gohir.D09G089100
10kb_16vs25_upregulated_SNPs	i44782Gh	D09	35426348	Gohir.D09G089100
10kb_16vs25_upregulated_SNPs	i36390Gh	D09	37713271	Gohir.D09G102700
10kb_16vs25_upregulated_SNPs	i37670Gh	D09	44497405	Gohir.D09G151300
10kb_16vs25_upregulated_SNPs	i06518Gh	D09	49687457	Gohir.D09G205500
10kb_16vs25_upregulated_SNPs	i06520Gh	D09	49690854	Gohir.D09G205500
10kb_16vs25_upregulated_SNPs	i15829Gh	D09	49700571	Gohir.D09G205500
10kb_16vs25_upregulated_SNPs	i06522Gh	D09	49701011	Gohir.D09G205500
10kb_16vs25_upregulated_SNPs	i15830Gh	D09	49707487	Gohir.D09G205500
10kb_16vs25_upregulated_SNPs	i60818Gt	D09	50985184	Gohir.D09G220500
10kb_16vs25_upregulated_SNPs	i17402Gh	D10	507213	Gohir.D10G005500
10kb_16vs25_upregulated_SNPs	i11478Gh	D10	512497	Gohir.D10G005500
10kb_16vs25_upregulated_SNPs	i11504Gh	D10	1162324	Gohir.D10G013700
10kb_16vs25_upregulated_SNPs	i39228Gh	D10	3207196	Gohir.D10G036600
10kb_16vs25_upregulated_SNPs	i11595Gh	D10	3220375	Gohir.D10G036600
10kb_16vs25_upregulated_SNPs	i24986Gh	D10	55195206	Gohir.D10G187900
10kb_16vs25_upregulated_SNPs	i12150Gh	D10	59141054	Gohir.D10G204700
10kb_16vs25_upregulated_SNPs	i17600Gh	D10	62033733	Gohir.D10G217600
10kb_16vs25_upregulated_SNPs	i41671Gh	D10	65065998	Gohir.D10G233300
10kb_16vs25_upregulated_SNPs	i17620Gh	D10	65094732	Gohir.D10G233500
10kb_16vs25_upregulated_SNPs	i06723Gh	D11	1536792	Gohir.D11G017000
10kb_16vs25_upregulated_SNPs	i15896Gh	D11	1693954	Gohir.D11G018600
10kb_16vs25_upregulated_SNPs	i06752Gh	D11	1937029	Gohir.D11G022200
10kb_16vs25_upregulated_SNPs	i06880Gh	D11	4782502	Gohir.D11G054400
10kb_16vs25_upregulated_SNPs	i06881Gh	D11	4783865	Gohir.D11G054400
10kb_16vs25_upregulated_SNPs	i38417Gh	D11	12511712	Gohir.D11G127800
10kb_16vs25_upregulated_SNPs	i21605Gh	D11	18967848	Gohir.D11G171000
10kb_16vs25_upregulated_SNPs	i19320Gh	D11	21322070	Gohir.D11G185200
10kb_16vs25_upregulated_SNPs	i07327Gh	D11	24425041	Gohir.D11G196600
10kb_16vs25_upregulated_SNPs	i07331Gh	D11	24647201	Gohir.D11G197100
10kb_16vs25_upregulated_SNPs	i07768Gh	D12	592849	Gohir.D12G004300
10kb_16vs25_upregulated_SNPs	i07769Gh	D12	593223	Gohir.D12G004300
10kb_16vs25_upregulated_SNPs	i19397Gh	D12	791582	Gohir.D12G006500
10kb_16vs25_upregulated_SNPs	i16221Gh	D12	794161	Gohir.D12G006500
10kb_16vs25_upregulated_SNPs	i07782Gh	D12	820609	Gohir.D12G006900
10kb_16vs25_upregulated_SNPs	i07783Gh	D12	837727	Gohir.D12G006900
10kb_16vs25_upregulated_SNPs	i36260Gh	D12	1225839	Gohir.D12G010700
10kb_16vs25_upregulated_SNPs	i16251Gh	D12	3923546	Gohir.D12G030300
10kb_16vs25_upregulated_SNPs	i24373Gh	D12	4745256	Gohir.D12G035300
10kb_16vs25_upregulated_SNPs	i42284Gh	D12	51244595	Gohir.D12G165300
10kb_16vs25_upregulated_SNPs	i08262Gh	D12	51251309	Gohir.D12G165300
10kb_16vs25_upregulated_SNPs	i51807Gb	D12	54828354	Gohir.D12G190400
10kb_16vs25_upregulated_SNPs	i49026Gh	D12	54841588	Gohir.D12G190400
10kb_16vs25_upregulated_SNPs	i63138Gt	D12	57361410	Gohir.D12G211800
10kb_16vs25_upregulated_SNPs	i45537Gh	D12	58245454	Gohir.D12G220500
10kb_16vs25_upregulated_SNPs	i08560Gh	D12	58943214	Gohir.D12G226700
10kb_16vs25_upregulated_SNPs	i08561Gh	D12	58944146	Gohir.D12G226700
10kb_16vs25_upregulated_SNPs	i14140Gh	D12	58956239	Gohir.D12G226700
10kb_16vs25_upregulated_SNPs	i16490Gh	D12	60742530	Gohir.D12G245100
10kb_16vs25_upregulated_SNPs	i08637Gh	D12	60746244	Gohir.D12G245100
10kb_16vs25_upregulated_SNPs	i08749Gh	D12	62266209	Gohir.D12G260700
10kb_16vs25_upregulated_SNPs	i08761Gh	D12	62348540	Gohir.D12G261400
10kb_16vs25_upregulated_SNPs	i08775Gh	D12	62571987	Gohir.D12G263700
10kb_16vs25_upregulated_SNPs	i12963Gh	D13	234081	Gohir.D13G002400
10kb_16vs25_upregulated_SNPs	i13001Gh	D13	1444270	Gohir.D13G015300
10kb_16vs25_upregulated_SNPs	i45120Gh	D13	20027503	Gohir.D13G087600
10kb_16vs25_upregulated_SNPs	i18351Gh	D13	26002415	Gohir.D13G096900
10kb_16vs25_upregulated_SNPs	i23631Gh	D13	42240219	Gohir.D13G123200
10kb_16vs25_upregulated_SNPs	i13407Gh	D13	46892801	Gohir.D13G134300
10kb_16vs25_upregulated_SNPs	i11420Gh	D13	57756253	Gohir.D13G178700
10kb_16vs25_upregulated_SNPs	i11418Gh	D13	57766262	Gohir.D13G178700
10kb_16vs25_upregulated_SNPs	i13687Gh	D13	59568525	Gohir.D13G193100
10kb_16vs25_upregulated_SNPs	i50952Gb	D13	59807591	Gohir.D13G195300
10kb_16vs25_upregulated_SNPs	i13737Gh	D13	61184431	Gohir.D13G207500
10kb_16vs25_upregulated_SNPs	i18126Gh	D13	61184831	Gohir.D13G207500
10kb_16vs25_upregulated_SNPs	i13740Gh	D13	61204437	Gohir.D13G207600
10kb_16vs25_upregulated_SNPs	i13839Gh	D13	62847291	Gohir.D13G220200
10kb_16vs25_upregulated_SNPs	i20388Gh	D13	63219314	Gohir.D13G224000
10kb_16vs25_downregulated_SNPs	i45036Gh	A01	4001703	Gohir.A01G039400
10kb_16vs25_downregulated_SNPs	i48009Gh	A01	9831024	Gohir.A01G070300
10kb_16vs25_downregulated_SNPs	i45630Gh	A01	19609161	Gohir.A01G101400
10kb_16vs25_downregulated_SNPs	i21210Gh	A01	19613486	Gohir.A01G101400
10kb_16vs25_downregulated_SNPs	i45902Gh	A01	95945668	Gohir.A01G183500
10kb_16vs25_downregulated_SNPs	i22285Gh	A01	101998207	Gohir.A01G212400
10kb_16vs25_downregulated_SNPs	i31404Gh	A01	102046720	Gohir.A01G213000
10kb_16vs25_downregulated_SNPs	i51490Gb	A03	1293622	Gohir.A03G008500
10kb_16vs25_downregulated_SNPs	i32118Gh	A03	1987454	Gohir.A03G012200
10kb_16vs25_downregulated_SNPs	i26677Gh	A03	4551855	Gohir.A03G028400
10kb_16vs25_downregulated_SNPs	i29903Gh	A03	6996326	Gohir.A03G038500
10kb_16vs25_downregulated_SNPs	i39617Gh	A03	98622164	Gohir.A03G150400
10kb_16vs25_downregulated_SNPs	i35063Gh	A03	106095832	Gohir.A03G188800
10kb_16vs25_downregulated_SNPs	i25505Gh	A05	9925242	Gohir.A05G106600
10kb_16vs25_downregulated_SNPs	i48203Gh	A05	9937921	Gohir.A05G106600
10kb_16vs25_downregulated_SNPs	i00320Gh	A05	14026125	Gohir.A05G145500
10kb_16vs25_downregulated_SNPs	i09426Gh	A05	14482764	Gohir.A05G149800
10kb_16vs25_downregulated_SNPs	i52708Gb	A05	14483649	Gohir.A05G149800
10kb_16vs25_downregulated_SNPs	i09498Gh	A05	16498160	Gohir.A05G167300
10kb_16vs25_downregulated_SNPs	i47763Gh	A05	21120971	Gohir.A05G210800
10kb_16vs25_downregulated_SNPs	i28890Gh	A05	31104836	Gohir.A05G271900
10kb_16vs25_downregulated_SNPs	i48606Gh	A05	45380631	Gohir.A05G306800
10kb_16vs25_downregulated_SNPs	i49006Gh	A05	98812663	Gohir.A05G402100
10kb_16vs25_downregulated_SNPs	i44670Gh	A05	98991823	Gohir.A05G403200
10kb_16vs25_downregulated_SNPs	i65892Ga	A06	57914	Gohir.A06G001100
10kb_16vs25_downregulated_SNPs	i51004Gb	A06	1551982	Gohir.A06G015200
10kb_16vs25_downregulated_SNPs	i00333Gh	A07	2294813	Gohir.A07G020200
10kb_16vs25_downregulated_SNPs	i35631Gh	A07	4546814	Gohir.A07G037700
10kb_16vs25_downregulated_SNPs	i28204Gh	A07	10158164	Gohir.A07G072500
10kb_16vs25_downregulated_SNPs	i36216Gh	A07	10962821	Gohir.A07G077300
10kb_16vs25_downregulated_SNPs	i43291Gh	A07	10972102	Gohir.A07G077300
10kb_16vs25_downregulated_SNPs	i36939Gh	A07	20706094	Gohir.A07G112000
10kb_16vs25_downregulated_SNPs	i59099Gb	A07	21101533	Gohir.A07G113300
10kb_16vs25_downregulated_SNPs	i38889Gh	A07	27134565	Gohir.A07G130800
10kb_16vs25_downregulated_SNPs	i43067Gh	A07	44873123	Gohir.A07G157000
10kb_16vs25_downregulated_SNPs	i41987Gh	A07	87606028	Gohir.A07G194400
10kb_16vs25_downregulated_SNPs	i45639Gh	A07	88560760	Gohir.A07G198900
10kb_16vs25_downregulated_SNPs	i30531Gh	A07	88561871	Gohir.A07G198900
10kb_16vs25_downregulated_SNPs	i31183Gh	A08	9343342	Gohir.A08G060600
10kb_16vs25_downregulated_SNPs	i31945Gh	A08	9345256	Gohir.A08G060600
10kb_16vs25_downregulated_SNPs	i35992Gh	A08	9829360	Gohir.A08G061500
10kb_16vs25_downregulated_SNPs	i22628Gh	A08	89726166	Gohir.A08G115900
10kb_16vs25_downregulated_SNPs	i48390Gh	A08	107799026	Gohir.A08G154500
10kb_16vs25_downregulated_SNPs	i44233Gh	A08	112332293	Gohir.A08G172200
10kb_16vs25_downregulated_SNPs	i04572Gh	A08	115861621	Gohir.A08G187700
10kb_16vs25_downregulated_SNPs	i39966Gh	A09	376257	Gohir.A09G001100
10kb_16vs25_downregulated_SNPs	i40181Gh	A09	5868910	Gohir.A09G019100
10kb_16vs25_downregulated_SNPs	i21353Gh	A09	61127117	Gohir.A09G090000
10kb_16vs25_downregulated_SNPs	i15738Gh	A09	68898316	Gohir.A09G129400
10kb_16vs25_downregulated_SNPs	i47965Gh	A09	80178160	Gohir.A09G230300
10kb_16vs25_downregulated_SNPs	i32110Gh	A10	709571	Gohir.A10G008400
10kb_16vs25_downregulated_SNPs	i36076Gh	A10	4338885	Gohir.A10G045200
10kb_16vs25_downregulated_SNPs	i41552Gh	A10	82875992	Gohir.A10G154700
10kb_16vs25_downregulated_SNPs	i58116Gb	A10	87000385	Gohir.A10G160900
10kb_16vs25_downregulated_SNPs	i34508Gh	A10	110968428	Gohir.A10G235100
10kb_16vs25_downregulated_SNPs	i49113Gh	A10	111469685	Gohir.A10G239200
10kb_16vs25_downregulated_SNPs	i00794Gh	A11	1115088	Gohir.A11G011400
10kb_16vs25_downregulated_SNPs	i15940Gh	A11	6467894	Gohir.A11G070300
10kb_16vs25_downregulated_SNPs	i38097Gh	A11	7234008	Gohir.A11G078100
10kb_16vs25_downregulated_SNPs	i50370Gb	A11	14239651	Gohir.A11G126200
10kb_16vs25_downregulated_SNPs	i41717Gh	A12	3252686	Gohir.A12G023100
10kb_16vs25_downregulated_SNPs	i34739Gh	A12	81088338	Gohir.A12G136800
10kb_16vs25_downregulated_SNPs	i35524Gh	A12	93131876	Gohir.A12G187100
10kb_16vs25_downregulated_SNPs	i08295Gh	A12	95776221	Gohir.A12G204700
10kb_16vs25_downregulated_SNPs	i52456Gb	A13	2649003	Gohir.A13G020400
10kb_16vs25_downregulated_SNPs	i40299Gh	A13	3815329	Gohir.A13G031100
10kb_16vs25_downregulated_SNPs	i40849Gh	A13	87031321	Gohir.A13G135700
10kb_16vs25_downregulated_SNPs	i35678Gh	A13	87298986	Gohir.A13G137000
10kb_16vs25_downregulated_SNPs	i23228Gh	A13	94960462	Gohir.A13G162200
10kb_16vs25_downregulated_SNPs	i00475Gh	A13	97126154	Gohir.A13G171700
10kb_16vs25_downregulated_SNPs	i28378Gh	A13	100378571	Gohir.A13G197000
10kb_16vs25_downregulated_SNPs	i52256Gb	A13	100379251	Gohir.A13G197000
10kb_16vs25_downregulated_SNPs	i00720Gh	A13	100379335	Gohir.A13G197000
10kb_16vs25_downregulated_SNPs	i37798Gh	A13	100394613	Gohir.A13G197000
10kb_16vs25_downregulated_SNPs	i31821Gh	A13	103357901	Gohir.A13G221300
10kb_16vs25_downregulated_SNPs	i13659Gh	A13	103610140	Gohir.A13G223900
10kb_16vs25_downregulated_SNPs	i51136Gb	A13	104468486	Gohir.A13G235200
10kb_16vs25_downregulated_SNPs	i02320Gh	D01	2643576	Gohir.D01G027200
10kb_16vs25_downregulated_SNPs	i00470Gh	D01	4584636	Gohir.D01G040400
10kb_16vs25_downregulated_SNPs	i02349Gh	D01	4585957	Gohir.D01G040400
10kb_16vs25_downregulated_SNPs	i02405Gh	D01	6625675	Gohir.D01G052700
10kb_16vs25_downregulated_SNPs	i41032Gh	D01	7515437	Gohir.D01G057600
10kb_16vs25_downregulated_SNPs	i26925Gh	D01	9060003	Gohir.D01G062700
10kb_16vs25_downregulated_SNPs	i02457Gh	D01	9971949	Gohir.D01G068500
10kb_16vs25_downregulated_SNPs	i14626Gh	D01	9972769	Gohir.D01G068500
10kb_16vs25_downregulated_SNPs	i02459Gh	D01	9974515	Gohir.D01G068500
10kb_16vs25_downregulated_SNPs	i02460Gh	D01	9977691	Gohir.D01G068500
10kb_16vs25_downregulated_SNPs	i00224Gh	D01	10344295	Gohir.D01G070300
10kb_16vs25_downregulated_SNPs	i02538Gh	D01	15150243	Gohir.D01G088500
10kb_16vs25_downregulated_SNPs	i34978Gh	D01	19822191	Gohir.D01G105200
10kb_16vs25_downregulated_SNPs	i02646Gh	D01	35563058	Gohir.D01G130000
10kb_16vs25_downregulated_SNPs	i28457Gh	D01	35579690	Gohir.D01G130000
10kb_16vs25_downregulated_SNPs	i45904Gh	D01	38926788	Gohir.D01G132700
10kb_16vs25_downregulated_SNPs	i40570Gh	D01	38932804	Gohir.D01G132700
10kb_16vs25_downregulated_SNPs	i38003Gh	D01	57483067	Gohir.D01G172700
10kb_16vs25_downregulated_SNPs	i02866Gh	D01	57556294	Gohir.D01G173300
10kb_16vs25_downregulated_SNPs	i03003Gh	D01	62150168	Gohir.D01G198000
10kb_16vs25_downregulated_SNPs	i13987Gh	D01	62246726	Gohir.D01G199200
10kb_16vs25_downregulated_SNPs	i18837Gh	D02	423008	Gohir.D02G005700
10kb_16vs25_downregulated_SNPs	i47804Gh	D02	2324654	Gohir.D02G018100
10kb_16vs25_downregulated_SNPs	i36851Gh	D02	2341451	Gohir.D02G018200
10kb_16vs25_downregulated_SNPs	i05032Gh	D02	4697533	Gohir.D02G036700
10kb_16vs25_downregulated_SNPs	i05619Gh	D02	66546166	Gohir.D02G193800
10kb_16vs25_downregulated_SNPs	i05620Gh	D02	66548750	Gohir.D02G193800
10kb_16vs25_downregulated_SNPs	i05734Gh	D02	69033868	Gohir.D02G216900
10kb_16vs25_downregulated_SNPs	i15585Gh	D02	69039672	Gohir.D02G216900
10kb_16vs25_downregulated_SNPs	i15617Gh	D02	69596893	Gohir.D02G223900
10kb_16vs25_downregulated_SNPs	i15618Gh	D02	69598521	Gohir.D02G223900
10kb_16vs25_downregulated_SNPs	i05769Gh	D02	69598895	Gohir.D02G223900
10kb_16vs25_downregulated_SNPs	i65685Gm	D02	69660920	Gohir.D02G225200
10kb_16vs25_downregulated_SNPs	i38774Gh	D03	397129	Gohir.D03G005500
10kb_16vs25_downregulated_SNPs	i03096Gh	D03	545263	Gohir.D03G007600
10kb_16vs25_downregulated_SNPs	i03098Gh	D03	561175	Gohir.D03G007600
10kb_16vs25_downregulated_SNPs	i03187Gh	D03	2629122	Gohir.D03G026000
10kb_16vs25_downregulated_SNPs	i47812Gh	D03	2640913	Gohir.D03G026000
10kb_16vs25_downregulated_SNPs	i01044Gh	D03	3277801	Gohir.D03G030300
10kb_16vs25_downregulated_SNPs	i24128Gh	D03	13904596	Gohir.D03G060700
10kb_16vs25_downregulated_SNPs	i03401Gh	D03	42249247	Gohir.D03G113800
10kb_16vs25_downregulated_SNPs	i03442Gh	D03	44809511	Gohir.D03G124400
10kb_16vs25_downregulated_SNPs	i00705Gh	D03	44824617	Gohir.D03G124600
10kb_16vs25_downregulated_SNPs	i18569Gh	D03	44824769	Gohir.D03G124600
10kb_16vs25_downregulated_SNPs	i18578Gh	D03	48361240	Gohir.D03G142400
10kb_16vs25_downregulated_SNPs	i03521Gh	D03	48366112	Gohir.D03G142400
10kb_16vs25_downregulated_SNPs	i43459Gh	D03	51414563	Gohir.D03G163900
10kb_16vs25_downregulated_SNPs	i20139Gh	D04	1323954	Gohir.D04G009900
10kb_16vs25_downregulated_SNPs	i12418Gh	D04	1662147	Gohir.D04G012300
10kb_16vs25_downregulated_SNPs	i12419Gh	D04	1662744	Gohir.D04G012300
10kb_16vs25_downregulated_SNPs	i47846Gh	D04	7967607	Gohir.D04G049200
10kb_16vs25_downregulated_SNPs	i12659Gh	D04	11715994	Gohir.D04G063800
10kb_16vs25_downregulated_SNPs	i12740Gh	D04	47681648	Gohir.D04G134600
10kb_16vs25_downregulated_SNPs	i12810Gh	D04	51929811	Gohir.D04G152400
10kb_16vs25_downregulated_SNPs	i12824Gh	D04	52240178	Gohir.D04G155400
10kb_16vs25_downregulated_SNPs	i22028Gh	D05	658515	Gohir.D05G006100
10kb_16vs25_downregulated_SNPs	i08852Gh	D05	2141686	Gohir.D05G023200
10kb_16vs25_downregulated_SNPs	i08871Gh	D05	2546091	Gohir.D05G028600
10kb_16vs25_downregulated_SNPs	i08891Gh	D05	2884446	Gohir.D05G033100
10kb_16vs25_downregulated_SNPs	i08892Gh	D05	2886613	Gohir.D05G033100
10kb_16vs25_downregulated_SNPs	i08895Gh	D05	2896178	Gohir.D05G033100
10kb_16vs25_downregulated_SNPs	i08972Gh	D05	4242978	Gohir.D05G050700
10kb_16vs25_downregulated_SNPs	i08982Gh	D05	4443144	Gohir.D05G052900
10kb_16vs25_downregulated_SNPs	i16592Gh	D05	5319520	Gohir.D05G064000
10kb_16vs25_downregulated_SNPs	i16605Gh	D05	6075312	Gohir.D05G072800
10kb_16vs25_downregulated_SNPs	i09202Gh	D05	8485685	Gohir.D05G100000
10kb_16vs25_downregulated_SNPs	i09203Gh	D05	8486980	Gohir.D05G100000
10kb_16vs25_downregulated_SNPs	i09206Gh	D05	8498126	Gohir.D05G100000
10kb_16vs25_downregulated_SNPs	i09363Gh	D05	12307652	Gohir.D05G139600
10kb_16vs25_downregulated_SNPs	i16694Gh	D05	13731019	Gohir.D05G153900
10kb_16vs25_downregulated_SNPs	i09491Gh	D05	14675413	Gohir.D05G163000
10kb_16vs25_downregulated_SNPs	i09501Gh	D05	15121361	Gohir.D05G167700
10kb_16vs25_downregulated_SNPs	i09580Gh	D05	17416675	Gohir.D05G192900
10kb_16vs25_downregulated_SNPs	i09626Gh	D05	19305440	Gohir.D05G213400
10kb_16vs25_downregulated_SNPs	i19574Gh	D05	19308058	Gohir.D05G213400
10kb_16vs25_downregulated_SNPs	i40266Gh	D05	19678761	Gohir.D05G217000
10kb_16vs25_downregulated_SNPs	i00599Gh	D05	19969757	Gohir.D05G219300
10kb_16vs25_downregulated_SNPs	i60860Gt	D05	26003154	Gohir.D05G265000
10kb_16vs25_downregulated_SNPs	i09859Gh	D05	26003266	Gohir.D05G265000
10kb_16vs25_downregulated_SNPs	i31837Gh	D05	31906660	Gohir.D05G293700
10kb_16vs25_downregulated_SNPs	i10527Gh	D06	196183	Gohir.D06G002300
10kb_16vs25_downregulated_SNPs	i10540Gh	D06	491959	Gohir.D06G004300
10kb_16vs25_downregulated_SNPs	i10541Gh	D06	493561	Gohir.D06G004300
10kb_16vs25_downregulated_SNPs	i00683Gh	D06	1130419	Gohir.D06G011300
10kb_16vs25_downregulated_SNPs	i10585Gh	D06	1138160	Gohir.D06G011300
10kb_16vs25_downregulated_SNPs	i10676Gh	D06	2256931	Gohir.D06G020900
10kb_16vs25_downregulated_SNPs	i10683Gh	D06	2371566	Gohir.D06G021500
10kb_16vs25_downregulated_SNPs	i17147Gh	D06	2373891	Gohir.D06G021500
10kb_16vs25_downregulated_SNPs	i10777Gh	D06	4313514	Gohir.D06G035700
10kb_16vs25_downregulated_SNPs	i10778Gh	D06	4313757	Gohir.D06G035700
10kb_16vs25_downregulated_SNPs	i38604Gh	D06	5344264	Gohir.D06G039200
10kb_16vs25_downregulated_SNPs	i32916Gh	D06	5344970	Gohir.D06G039200
10kb_16vs25_downregulated_SNPs	i10948Gh	D06	13785612	Gohir.D06G072300
10kb_16vs25_downregulated_SNPs	i11253Gh	D06	59704582	Gohir.D06G161600
10kb_16vs25_downregulated_SNPs	i00928Gh	D07	1102075	Gohir.D07G009600
10kb_16vs25_downregulated_SNPs	i18200Gh	D07	1918221	Gohir.D07G017600
10kb_16vs25_downregulated_SNPs	i27150Gh	D07	12839924	Gohir.D07G099200
10kb_16vs25_downregulated_SNPs	i01676Gh	D07	13807848	Gohir.D07G103300
10kb_16vs25_downregulated_SNPs	i01677Gh	D07	13808500	Gohir.D07G103300
10kb_16vs25_downregulated_SNPs	i14390Gh	D07	18886462	Gohir.D07G125100
10kb_16vs25_downregulated_SNPs	i01828Gh	D07	23191929	Gohir.D07G143000
10kb_16vs25_downregulated_SNPs	i01916Gh	D07	29880130	Gohir.D07G160700
10kb_16vs25_downregulated_SNPs	i28326Gh	D07	31101511	Gohir.D07G164300
10kb_16vs25_downregulated_SNPs	i40186Gh	D07	32779983	Gohir.D07G167300
10kb_16vs25_downregulated_SNPs	i02007Gh	D07	50536751	Gohir.D07G196600
10kb_16vs25_downregulated_SNPs	i29304Gh	D07	51097104	Gohir.D07G198700
10kb_16vs25_downregulated_SNPs	i14483Gh	D07	52426865	Gohir.D07G203400
10kb_16vs25_downregulated_SNPs	i45909Gh	D07	52448806	Gohir.D07G203600
10kb_16vs25_downregulated_SNPs	i36669Gh	D07	53520285	Gohir.D07G210000
10kb_16vs25_downregulated_SNPs	i02142Gh	D07	57489482	Gohir.D07G236100
10kb_16vs25_downregulated_SNPs	i03857Gh	D08	2847406	Gohir.D08G029400
10kb_16vs25_downregulated_SNPs	i34638Gh	D08	2860379	Gohir.D08G029400
10kb_16vs25_downregulated_SNPs	i01143Gh	D08	2861931	Gohir.D08G029400
10kb_16vs25_downregulated_SNPs	i64921Gm	D08	2862490	Gohir.D08G029400
10kb_16vs25_downregulated_SNPs	i48272Gh	D08	2863955	Gohir.D08G029400
10kb_16vs25_downregulated_SNPs	i04045Gh	D08	9462067	Gohir.D08G071000
10kb_16vs25_downregulated_SNPs	i04046Gh	D08	9462271	Gohir.D08G071000
10kb_16vs25_downregulated_SNPs	i04056Gh	D08	9622385	Gohir.D08G071700
10kb_16vs25_downregulated_SNPs	i04057Gh	D08	9623502	Gohir.D08G071700
10kb_16vs25_downregulated_SNPs	i04058Gh	D08	9624217	Gohir.D08G071700
10kb_16vs25_downregulated_SNPs	i39937Gh	D08	32452289	Gohir.D08G110100
10kb_16vs25_downregulated_SNPs	i42551Gh	D08	50457556	Gohir.D08G149000
10kb_16vs25_downregulated_SNPs	i37271Gh	D08	60583133	Gohir.D08G197000
10kb_16vs25_downregulated_SNPs	i15159Gh	D08	60598967	Gohir.D08G197000
10kb_16vs25_downregulated_SNPs	i15160Gh	D08	60599018	Gohir.D08G197000
10kb_16vs25_downregulated_SNPs	i00947Gh	D08	63209385	Gohir.D08G213900
10kb_16vs25_downregulated_SNPs	i04635Gh	D08	64319599	Gohir.D08G220500
10kb_16vs25_downregulated_SNPs	i15217Gh	D08	64327226	Gohir.D08G220500
10kb_16vs25_downregulated_SNPs	i48423Gh	D08	64481004	Gohir.D08G222000
10kb_16vs25_downregulated_SNPs	i04689Gh	D08	65936827	Gohir.D08G235000
10kb_16vs25_downregulated_SNPs	i04718Gh	D08	66371744	Gohir.D08G237700
10kb_16vs25_downregulated_SNPs	i41037Gh	D09	3250076	Gohir.D09G013200
10kb_16vs25_downregulated_SNPs	i47516Gh	D09	3251123	Gohir.D09G013200
10kb_16vs25_downregulated_SNPs	i48125Gh	D09	36257594	Gohir.D09G093900
10kb_16vs25_downregulated_SNPs	i26114Gh	D09	38470215	Gohir.D09G107700
10kb_16vs25_downregulated_SNPs	i06203Gh	D09	41763649	Gohir.D09G129700
10kb_16vs25_downregulated_SNPs	i06206Gh	D09	42138927	Gohir.D09G132300
10kb_16vs25_downregulated_SNPs	i06207Gh	D09	42140573	Gohir.D09G132300
10kb_16vs25_downregulated_SNPs	i15747Gh	D09	42141180	Gohir.D09G132300
10kb_16vs25_downregulated_SNPs	i43320Gh	D09	43293588	Gohir.D09G140800
10kb_16vs25_downregulated_SNPs	i06236Gh	D09	43357654	Gohir.D09G141700
10kb_16vs25_downregulated_SNPs	i15762Gh	D09	43358161	Gohir.D09G141700
10kb_16vs25_downregulated_SNPs	i06238Gh	D09	43361911	Gohir.D09G141700
10kb_16vs25_downregulated_SNPs	i06323Gh	D09	44474779	Gohir.D09G151100
10kb_16vs25_downregulated_SNPs	i06326Gh	D09	44487215	Gohir.D09G151100
10kb_16vs25_downregulated_SNPs	i06487Gh	D09	48936704	Gohir.D09G196800
10kb_16vs25_downregulated_SNPs	i06488Gh	D09	48938160	Gohir.D09G196800
10kb_16vs25_downregulated_SNPs	i19243Gh	D09	49081511	Gohir.D09G197900
10kb_16vs25_downregulated_SNPs	i06507Gh	D09	49320807	Gohir.D09G200900
10kb_16vs25_downregulated_SNPs	i06551Gh	D09	50413963	Gohir.D09G213500
10kb_16vs25_downregulated_SNPs	i06592Gh	D09	51290746	Gohir.D09G223500
10kb_16vs25_downregulated_SNPs	i19249Gh	D09	51601120	Gohir.D09G226700
10kb_16vs25_downregulated_SNPs	i06621Gh	D09	51962952	Gohir.D09G230700
10kb_16vs25_downregulated_SNPs	i06622Gh	D09	51966320	Gohir.D09G230700
10kb_16vs25_downregulated_SNPs	i06624Gh	D09	51987908	Gohir.D09G230800
10kb_16vs25_downregulated_SNPs	i06625Gh	D09	51990344	Gohir.D09G230800
10kb_16vs25_downregulated_SNPs	i06632Gh	D09	52229839	Gohir.D09G234600
10kb_16vs25_downregulated_SNPs	i45038Gh	D10	718447	Gohir.D10G008200
10kb_16vs25_downregulated_SNPs	i11501Gh	D10	1114987	Gohir.D10G012800
10kb_16vs25_downregulated_SNPs	i11506Gh	D10	1179482	Gohir.D10G014000
10kb_16vs25_downregulated_SNPs	i11507Gh	D10	1181934	Gohir.D10G014000
10kb_16vs25_downregulated_SNPs	i11508Gh	D10	1184090	Gohir.D10G014000
10kb_16vs25_downregulated_SNPs	i11532Gh	D10	1444870	Gohir.D10G017000
10kb_16vs25_downregulated_SNPs	i17417Gh	D10	1787488	Gohir.D10G020800
10kb_16vs25_downregulated_SNPs	i11590Gh	D10	3005542	Gohir.D10G034100
10kb_16vs25_downregulated_SNPs	i34769Gh	D10	3239665	Gohir.D10G037100
10kb_16vs25_downregulated_SNPs	i11600Gh	D10	3284452	Gohir.D10G037500
10kb_16vs25_downregulated_SNPs	i17425Gh	D10	3285315	Gohir.D10G037500
10kb_16vs25_downregulated_SNPs	i17426Gh	D10	3285395	Gohir.D10G037500
10kb_16vs25_downregulated_SNPs	i11619Gh	D10	3527294	Gohir.D10G040500
10kb_16vs25_downregulated_SNPs	i24666Gh	D10	6713326	Gohir.D10G065500
10kb_16vs25_downregulated_SNPs	i43419Gh	D10	6817963	Gohir.D10G066000
10kb_16vs25_downregulated_SNPs	i11804Gh	D10	10740623	Gohir.D10G083200
10kb_16vs25_downregulated_SNPs	i11805Gh	D10	10745647	Gohir.D10G083200
10kb_16vs25_downregulated_SNPs	i45503Gh	D10	32019471	Gohir.D10G144400
10kb_16vs25_downregulated_SNPs	i12144Gh	D10	58879231	Gohir.D10G202900
10kb_16vs25_downregulated_SNPs	i12345Gh	D10	67564742	Gohir.D10G250600
10kb_16vs25_downregulated_SNPs	i40113Gh	D10	67569732	Gohir.D10G250600
10kb_16vs25_downregulated_SNPs	i06705Gh	D11	1260257	Gohir.D11G013300
10kb_16vs25_downregulated_SNPs	i06708Gh	D11	1265143	Gohir.D11G013300
10kb_16vs25_downregulated_SNPs	i06791Gh	D11	2383662	Gohir.D11G027300
10kb_16vs25_downregulated_SNPs	i06898Gh	D11	5449992	Gohir.D11G062200
10kb_16vs25_downregulated_SNPs	i15946Gh	D11	6568613	Gohir.D11G076500
10kb_16vs25_downregulated_SNPs	i19287Gh	D11	7138094	Gohir.D11G082800
10kb_16vs25_downregulated_SNPs	i15987Gh	D11	13498129	Gohir.D11G135800
10kb_16vs25_downregulated_SNPs	i33839Gh	D11	57770382	Gohir.D11G258700
10kb_16vs25_downregulated_SNPs	i07536Gh	D11	62870564	Gohir.D11G284400
10kb_16vs25_downregulated_SNPs	i07703Gh	D11	71493999	Gohir.D11G331000
10kb_16vs25_downregulated_SNPs	i07795Gh	D12	1316359	Gohir.D12G010900
10kb_16vs25_downregulated_SNPs	i32816Gh	D12	51698476	Gohir.D12G168800
10kb_16vs25_downregulated_SNPs	i08309Gh	D12	52867633	Gohir.D12G176800
10kb_16vs25_downregulated_SNPs	i08310Gh	D12	52869343	Gohir.D12G176800
10kb_16vs25_downregulated_SNPs	i08343Gh	D12	54145051	Gohir.D12G184800
10kb_16vs25_downregulated_SNPs	i08370Gh	D12	54814101	Gohir.D12G190100
10kb_16vs25_downregulated_SNPs	i16398Gh	D12	54924383	Gohir.D12G191100
10kb_16vs25_downregulated_SNPs	i16399Gh	D12	54925777	Gohir.D12G191100
10kb_16vs25_downregulated_SNPs	i08471Gh	D12	56785961	Gohir.D12G207100
10kb_16vs25_downregulated_SNPs	i00607Gh	D12	58704209	Gohir.D12G223500
10kb_16vs25_downregulated_SNPs	i08545Gh	D12	58704231	Gohir.D12G223500
10kb_16vs25_downregulated_SNPs	i08547Gh	D12	58705484	Gohir.D12G223500
10kb_16vs25_downregulated_SNPs	i16463Gh	D12	58716060	Gohir.D12G223500
10kb_16vs25_downregulated_SNPs	i16464Gh	D12	58716114	Gohir.D12G223500
10kb_16vs25_downregulated_SNPs	i08562Gh	D12	58965020	Gohir.D12G226900
10kb_16vs25_downregulated_SNPs	i45546Gh	D12	59301091	Gohir.D12G231200
10kb_16vs25_downregulated_SNPs	i08618Gh	D12	60148301	Gohir.D12G238400
10kb_16vs25_downregulated_SNPs	i08629Gh	D12	60492979	Gohir.D12G242100
10kb_16vs25_downregulated_SNPs	i08633Gh	D12	60496765	Gohir.D12G242100
10kb_16vs25_downregulated_SNPs	i00385Gh	D12	60498632	Gohir.D12G242100
10kb_16vs25_downregulated_SNPs	i01084Gh	D12	60617561	Gohir.D12G243800
10kb_16vs25_downregulated_SNPs	i12984Gh	D13	825751	Gohir.D13G008500
10kb_16vs25_downregulated_SNPs	i12999Gh	D13	1413989	Gohir.D13G014900
10kb_16vs25_downregulated_SNPs	i13051Gh	D13	2509749	Gohir.D13G023800
10kb_16vs25_downregulated_SNPs	i13052Gh	D13	2510857	Gohir.D13G023800
10kb_16vs25_downregulated_SNPs	i33498Gh	D13	4717554	Gohir.D13G040100
10kb_16vs25_downregulated_SNPs	i13283Gh	D13	32618951	Gohir.D13G103100
10kb_16vs25_downregulated_SNPs	i13396Gh	D13	46195546	Gohir.D13G131000
10kb_16vs25_downregulated_SNPs	i21027Gh	D13	56096733	Gohir.D13G167600
10kb_16vs25_downregulated_SNPs	i13598Gh	D13	56849162	Gohir.D13G171800
10kb_16vs25_downregulated_SNPs	i13599Gh	D13	56850802	Gohir.D13G171800
10kb_16vs25_downregulated_SNPs	i13602Gh	D13	56867705	Gohir.D13G171800
10kb_16vs25_downregulated_SNPs	i20357Gh	D13	56892817	Gohir.D13G172000
10kb_16vs25_downregulated_SNPs	i13805Gh	D13	62493270	Gohir.D13G216400
10kb_16vs25_downregulated_SNPs	i13807Gh	D13	62498995	Gohir.D13G216400
10kb_16vs25_downregulated_SNPs	i13884Gh	D13	63296197	Gohir.D13G225300
10kb_16vs25_downregulated_SNPs	i18161Gh	D13	63297211	Gohir.D13G225300
10kb_16vs25_downregulated_SNPs	i13885Gh	D13	63297416	Gohir.D13G225300

## Sheet: 07vs25_SNPs
comparison	ID	chromosome	location_coordinate	gene ID
exact_07vs25_upregulated_SNPs	i47972Gh	A01	12375043	Gohir.A01G080600
exact_07vs25_upregulated_SNPs	i36727Gh	A01	93599509	Gohir.A01G173700
exact_07vs25_upregulated_SNPs	i37996Gh	A01	96358493	Gohir.A01G185300
exact_07vs25_upregulated_SNPs	i51116Gb	A03	2156148	Gohir.A03G013500
exact_07vs25_upregulated_SNPs	i38618Gh	A03	6920467	Gohir.A03G038200
exact_07vs25_upregulated_SNPs	i05560Gh	A03	106813180	Gohir.A03G194300
exact_07vs25_upregulated_SNPs	i29674Gh	A05	2703390	Gohir.A05G027000
exact_07vs25_upregulated_SNPs	i39795Gh	A05	89260472	Gohir.A05G361000
exact_07vs25_upregulated_SNPs	i21675Gh	A05	93363990	Gohir.A05G376700
exact_07vs25_upregulated_SNPs	i38376Gh	A05	93376072	Gohir.A05G376800
exact_07vs25_upregulated_SNPs	i25026Gh	A06	1966133	Gohir.A06G018700
exact_07vs25_upregulated_SNPs	i14223Gh	A06	3874026	Gohir.A06G031600
exact_07vs25_upregulated_SNPs	i21778Gh	A06	118589292	Gohir.A06G183100
exact_07vs25_upregulated_SNPs	i11331Gh	A06	120621675	Gohir.A06G200200
exact_07vs25_upregulated_SNPs	i20815Gh	A06	121215981	Gohir.A06G208800
exact_07vs25_upregulated_SNPs	i28878Gh	A08	6522533	Gohir.A08G049700
exact_07vs25_upregulated_SNPs	i60714Gt	A08	121016150	Gohir.A08G224400
exact_07vs25_upregulated_SNPs	i27322Gh	A09	15689050	Gohir.A09G035000
exact_07vs25_upregulated_SNPs	i00903Gh	A09	72531111	Gohir.A09G151700
exact_07vs25_upregulated_SNPs	i15850Gh	A09	79778001	Gohir.A09G225500
exact_07vs25_upregulated_SNPs	i44707Gh	A10	99423286	Gohir.A10G186000
exact_07vs25_upregulated_SNPs	i29466Gh	A10	104289650	Gohir.A10G202600
exact_07vs25_upregulated_SNPs	i42321Gh	A10	109671822	Gohir.A10G228300
exact_07vs25_upregulated_SNPs	i00397Gh	A11	13781670	Gohir.A11G124500
exact_07vs25_upregulated_SNPs	i43666Gh	A12	95293414	Gohir.A12G199500
exact_07vs25_upregulated_SNPs	i38335Gh	A12	95875064	Gohir.A12G205800
exact_07vs25_upregulated_SNPs	i30955Gh	A13	6136330	Gohir.A13G046200
exact_07vs25_upregulated_SNPs	i27895Gh	A13	76596320	Gohir.A13G117700
exact_07vs25_upregulated_SNPs	i33881Gh	A13	88634568	Gohir.A13G141800
exact_07vs25_upregulated_SNPs	i13403Gh	A13	88846198	Gohir.A13G142600
exact_07vs25_upregulated_SNPs	i14562Gh	D01	2595618	Gohir.D01G026600
exact_07vs25_upregulated_SNPs	i02431Gh	D01	8500604	Gohir.D01G059900
exact_07vs25_upregulated_SNPs	i14621Gh	D01	8500734	Gohir.D01G059900
exact_07vs25_upregulated_SNPs	i14622Gh	D01	8500821	Gohir.D01G059900
exact_07vs25_upregulated_SNPs	i02434Gh	D01	8636076	Gohir.D01G060700
exact_07vs25_upregulated_SNPs	i14623Gh	D01	8638149	Gohir.D01G060700
exact_07vs25_upregulated_SNPs	i49465Gh	D01	23304927	Gohir.D01G112100
exact_07vs25_upregulated_SNPs	i32631Gh	D01	38879114	Gohir.D01G132600
exact_07vs25_upregulated_SNPs	i02674Gh	D01	42155200	Gohir.D01G136300
exact_07vs25_upregulated_SNPs	i13983Gh	D01	61037018	Gohir.D01G191900
exact_07vs25_upregulated_SNPs	i14752Gh	D01	61037259	Gohir.D01G191900
exact_07vs25_upregulated_SNPs	i03050Gh	D01	63120012	Gohir.D01G207100
exact_07vs25_upregulated_SNPs	i03051Gh	D01	63120196	Gohir.D01G207100
exact_07vs25_upregulated_SNPs	i04834Gh	D02	379206	Gohir.D02G005100
exact_07vs25_upregulated_SNPs	i05122Gh	D02	8904845	Gohir.D02G063800
exact_07vs25_upregulated_SNPs	i05152Gh	D02	11005872	Gohir.D02G072000
exact_07vs25_upregulated_SNPs	i33074Gh	D02	17800919	Gohir.D02G090200
exact_07vs25_upregulated_SNPs	i45229Gh	D02	55785164	Gohir.D02G150100
exact_07vs25_upregulated_SNPs	i48333Gh	D02	61180464	Gohir.D02G166900
exact_07vs25_upregulated_SNPs	i19018Gh	D02	61181947	Gohir.D02G166900
exact_07vs25_upregulated_SNPs	i36283Gh	D02	64540549	Gohir.D02G181400
exact_07vs25_upregulated_SNPs	i05631Gh	D02	67049234	Gohir.D02G198100
exact_07vs25_upregulated_SNPs	i05716Gh	D02	68462457	Gohir.D02G210500
exact_07vs25_upregulated_SNPs	i03540Gh	D03	48594155	Gohir.D03G144500
exact_07vs25_upregulated_SNPs	i03541Gh	D03	48594434	Gohir.D03G144500
exact_07vs25_upregulated_SNPs	i12395Gh	D04	1283450	Gohir.D04G009400
exact_07vs25_upregulated_SNPs	i37918Gh	D04	46203600	Gohir.D04G129400
exact_07vs25_upregulated_SNPs	i12747Gh	D04	47871447	Gohir.D04G136000
exact_07vs25_upregulated_SNPs	i19535Gh	D05	3996665	Gohir.D05G047700
exact_07vs25_upregulated_SNPs	i19536Gh	D05	3999333	Gohir.D05G047700
exact_07vs25_upregulated_SNPs	i61185Gt	D05	3999597	Gohir.D05G047700
exact_07vs25_upregulated_SNPs	i16592Gh	D05	5319520	Gohir.D05G064100
exact_07vs25_upregulated_SNPs	i09073Gh	D05	5319880	Gohir.D05G064100
exact_07vs25_upregulated_SNPs	i09074Gh	D05	5320760	Gohir.D05G064100
exact_07vs25_upregulated_SNPs	i09077Gh	D05	5372252	Gohir.D05G064900
exact_07vs25_upregulated_SNPs	i42752Gh	D05	6444473	Gohir.D05G077000
exact_07vs25_upregulated_SNPs	i09234Gh	D05	9063090	Gohir.D05G105700
exact_07vs25_upregulated_SNPs	i09311Gh	D05	11021725	Gohir.D05G125700
exact_07vs25_upregulated_SNPs	i09318Gh	D05	11150377	Gohir.D05G127800
exact_07vs25_upregulated_SNPs	i09334Gh	D05	11704744	Gohir.D05G133600
exact_07vs25_upregulated_SNPs	i09390Gh	D05	12641387	Gohir.D05G142800
exact_07vs25_upregulated_SNPs	i09472Gh	D05	13852394	Gohir.D05G155500
exact_07vs25_upregulated_SNPs	i09475Gh	D05	13880403	Gohir.D05G155600
exact_07vs25_upregulated_SNPs	i09486Gh	D05	14466186	Gohir.D05G161200
exact_07vs25_upregulated_SNPs	i09605Gh	D05	18569535	Gohir.D05G206100
exact_07vs25_upregulated_SNPs	i16784Gh	D05	25245909	Gohir.D05G258200
exact_07vs25_upregulated_SNPs	i19724Gh	D06	570700	Gohir.D06G005300
exact_07vs25_upregulated_SNPs	i64008Gm	D06	3193563	Gohir.D06G027600
exact_07vs25_upregulated_SNPs	i50575Gb	D06	3193592	Gohir.D06G027600
exact_07vs25_upregulated_SNPs	i53223Gb	D06	3193884	Gohir.D06G027600
exact_07vs25_upregulated_SNPs	i10805Gh	D06	5880776	Gohir.D06G040900
exact_07vs25_upregulated_SNPs	i11345Gh	D06	63942934	Gohir.D06G183000
exact_07vs25_upregulated_SNPs	i01303Gh	D07	1308787	Gohir.D07G011400
exact_07vs25_upregulated_SNPs	i01304Gh	D07	1309061	Gohir.D07G011400
exact_07vs25_upregulated_SNPs	i01305Gh	D07	1309216	Gohir.D07G011400
exact_07vs25_upregulated_SNPs	i01306Gh	D07	1309420	Gohir.D07G011400
exact_07vs25_upregulated_SNPs	i01307Gh	D07	1309942	Gohir.D07G011400
exact_07vs25_upregulated_SNPs	i13940Gh	D07	1310072	Gohir.D07G011400
exact_07vs25_upregulated_SNPs	i01818Gh	D07	21808008	Gohir.D07G136600
exact_07vs25_upregulated_SNPs	i03859Gh	D08	2865995	Gohir.D08G029600
exact_07vs25_upregulated_SNPs	i03948Gh	D08	5152998	Gohir.D08G049000
exact_07vs25_upregulated_SNPs	i15022Gh	D08	5153216	Gohir.D08G049000
exact_07vs25_upregulated_SNPs	i03949Gh	D08	5154046	Gohir.D08G049000
exact_07vs25_upregulated_SNPs	i03961Gh	D08	5413073	Gohir.D08G050700
exact_07vs25_upregulated_SNPs	i32640Gh	D08	34604670	Gohir.D08G113100
exact_07vs25_upregulated_SNPs	i11502Gh	D10	1130631	Gohir.D10G013100
exact_07vs25_upregulated_SNPs	i20010Gh	D10	3545413	Gohir.D10G040800
exact_07vs25_upregulated_SNPs	i45071Gh	D10	5029297	Gohir.D10G053700
exact_07vs25_upregulated_SNPs	i42631Gh	D10	11142008	Gohir.D10G084600
exact_07vs25_upregulated_SNPs	i20067Gh	D10	27606654	Gohir.D10G137400
exact_07vs25_upregulated_SNPs	i06847Gh	D11	3699312	Gohir.D11G043900
exact_07vs25_upregulated_SNPs	i07245Gh	D11	17780343	Gohir.D11G164800
exact_07vs25_upregulated_SNPs	i22400Gh	D11	58160901	Gohir.D11G260600
exact_07vs25_upregulated_SNPs	i07800Gh	D12	1375430	Gohir.D12G011800
exact_07vs25_upregulated_SNPs	i07801Gh	D12	1376067	Gohir.D12G011800
exact_07vs25_upregulated_SNPs	i19409Gh	D12	4701482	Gohir.D12G035200
exact_07vs25_upregulated_SNPs	i48361Gh	D12	44820679	Gohir.D12G130500
exact_07vs25_upregulated_SNPs	i08220Gh	D12	49692460	Gohir.D12G155800
exact_07vs25_upregulated_SNPs	i08451Gh	D12	56321325	Gohir.D12G201400
exact_07vs25_upregulated_SNPs	i11538Gh	D13	4665719	Gohir.D13G039800
exact_07vs25_upregulated_SNPs	i14228Gh	D13	57759892	Gohir.D13G178700
exact_07vs25_downregulated_SNPs	i39374Gh	A01	773519	Gohir.A01G007700
exact_07vs25_downregulated_SNPs	i02313Gh	A01	2859682	Gohir.A01G026800
exact_07vs25_downregulated_SNPs	i23300Gh	A01	96832999	Gohir.A01G186200
exact_07vs25_downregulated_SNPs	i28291Gh	A01	102274849	Gohir.A01G214800
exact_07vs25_downregulated_SNPs	i46853Gh	A01	102450507	Gohir.A01G216400
exact_07vs25_downregulated_SNPs	i27550Gh	A02	3714199	Gohir.A02G030200
exact_07vs25_downregulated_SNPs	i31406Gh	A03	90920662	Gohir.A03G133600
exact_07vs25_downregulated_SNPs	i24924Gh	A03	105442263	Gohir.A03G182300
exact_07vs25_downregulated_SNPs	i40448Gh	A04	47723251	Gohir.A04G065400
exact_07vs25_downregulated_SNPs	i21607Gh	A05	3139538	Gohir.A05G031700
exact_07vs25_downregulated_SNPs	i47107Gh	A05	14178247	Gohir.A05G147300
exact_07vs25_downregulated_SNPs	i12654Gh	A05	95003585	Gohir.A05G382400
exact_07vs25_downregulated_SNPs	i37034Gh	A07	22702350	Gohir.A07G118000
exact_07vs25_downregulated_SNPs	i04708Gh	A08	120028064	Gohir.A08G217000
exact_07vs25_downregulated_SNPs	i11810Gh	A10	20404333	Gohir.A10G098900
exact_07vs25_downregulated_SNPs	i17505Gh	A10	75010654	Gohir.A10G143900
exact_07vs25_downregulated_SNPs	i35443Gh	A13	4210203	Gohir.A13G033900
exact_07vs25_downregulated_SNPs	i02405Gh	D01	6625675	Gohir.D01G052700
exact_07vs25_downregulated_SNPs	i02518Gh	D01	12240061	Gohir.D01G080000
exact_07vs25_downregulated_SNPs	i43721Gh	D01	55930627	Gohir.D01G164700
exact_07vs25_downregulated_SNPs	i04823Gh	D02	147411	Gohir.D02G001800
exact_07vs25_downregulated_SNPs	i03096Gh	D03	545263	Gohir.D03G007600
exact_07vs25_downregulated_SNPs	i03218Gh	D03	3986981	Gohir.D03G034600
exact_07vs25_downregulated_SNPs	i00705Gh	D03	44824617	Gohir.D03G124600
exact_07vs25_downregulated_SNPs	i18569Gh	D03	44824769	Gohir.D03G124600
exact_07vs25_downregulated_SNPs	i12476Gh	D04	2745236	Gohir.D04G018600
exact_07vs25_downregulated_SNPs	i20150Gh	D04	6616907	Gohir.D04G042100
exact_07vs25_downregulated_SNPs	i12817Gh	D04	51991822	Gohir.D04G153200
exact_07vs25_downregulated_SNPs	i08833Gh	D05	1770044	Gohir.D05G018800
exact_07vs25_downregulated_SNPs	i08834Gh	D05	1770276	Gohir.D05G018800
exact_07vs25_downregulated_SNPs	i08844Gh	D05	2039782	Gohir.D05G022100
exact_07vs25_downregulated_SNPs	i08845Gh	D05	2039988	Gohir.D05G022100
exact_07vs25_downregulated_SNPs	i08893Gh	D05	2889054	Gohir.D05G033100
exact_07vs25_downregulated_SNPs	i08894Gh	D05	2891374	Gohir.D05G033100
exact_07vs25_downregulated_SNPs	i08916Gh	D05	3343489	Gohir.D05G039300
exact_07vs25_downregulated_SNPs	i09428Gh	D05	13266239	Gohir.D05G149600
exact_07vs25_downregulated_SNPs	i16682Gh	D05	13268891	Gohir.D05G149600
exact_07vs25_downregulated_SNPs	i32389Gh	D05	17405300	Gohir.D05G192900
exact_07vs25_downregulated_SNPs	i23937Gh	D05	18146257	Gohir.D05G201500
exact_07vs25_downregulated_SNPs	i19596Gh	D05	25964775	Gohir.D05G264500
exact_07vs25_downregulated_SNPs	i09864Gh	D05	26066065	Gohir.D05G265600
exact_07vs25_downregulated_SNPs	i22732Gh	D05	57276633	Gohir.D05G351700
exact_07vs25_downregulated_SNPs	i10525Gh	D06	165211	Gohir.D06G002100
exact_07vs25_downregulated_SNPs	i10584Gh	D06	1135639	Gohir.D06G011300
exact_07vs25_downregulated_SNPs	i17136Gh	D06	2002685	Gohir.D06G019200
exact_07vs25_downregulated_SNPs	i11371Gh	D06	64975575	Gohir.D06G188800
exact_07vs25_downregulated_SNPs	i60680Gb	D06	65294405	Gohir.D06G190100
exact_07vs25_downregulated_SNPs	i11464Gh	D06	66059929	Gohir.D06G195300
exact_07vs25_downregulated_SNPs	i01452Gh	D07	4840259	Gohir.D07G043400
exact_07vs25_downregulated_SNPs	i01453Gh	D07	4840766	Gohir.D07G043400
exact_07vs25_downregulated_SNPs	i01454Gh	D07	4840887	Gohir.D07G043400
exact_07vs25_downregulated_SNPs	i33582Gh	D07	32749588	Gohir.D07G167200
exact_07vs25_downregulated_SNPs	i49047Gh	D08	50452592	Gohir.D08G149100
exact_07vs25_downregulated_SNPs	i18793Gh	D08	60826610	Gohir.D08G197600
exact_07vs25_downregulated_SNPs	i39228Gh	D10	3207196	Gohir.D10G036700
exact_07vs25_downregulated_SNPs	i00230Gh	D10	6067354	Gohir.D10G061400
exact_07vs25_downregulated_SNPs	i24726Gh	D10	11775933	Gohir.D10G088000
exact_07vs25_downregulated_SNPs	i07354Gh	D11	28589850	Gohir.D11G208200
exact_07vs25_downregulated_SNPs	i16194Gh	D11	71576869	Gohir.D11G331500
exact_07vs25_downregulated_SNPs	i08677Gh	D12	61210498	Gohir.D12G250100
exact_07vs25_downregulated_SNPs	i08678Gh	D12	61211292	Gohir.D12G250100
exact_07vs25_downregulated_SNPs	i30146Gh	D13	47925213	Gohir.D13G136700
exact_07vs25_downregulated_SNPs	i18045Gh	D13	55796230	Gohir.D13G166500
exact_07vs25_downregulated_SNPs	i45991Gh	D13	56110416	Gohir.D13G167600
exact_07vs25_downregulated_SNPs	i41786Gh	D13	60995514	Gohir.D13G205500
exact_07vs25_downregulated_SNPs	i13812Gh	D13	62554533	Gohir.D13G216700
exact_07vs25_downregulated_SNPs	i13813Gh	D13	62571048	Gohir.D13G216800
1kb_07vs25_upregulated_SNPs	i52467Gb	A01	7488611	Gohir.A01G057200
1kb_07vs25_upregulated_SNPs	i36126Gh	A02	6595310	Gohir.A02G046300
1kb_07vs25_upregulated_SNPs	i47141Gh	A02	45363416	Gohir.A02G099600
1kb_07vs25_upregulated_SNPs	i44545Gh	A03	7212594	Gohir.A03G039500
1kb_07vs25_upregulated_SNPs	i55510Gb	A05	14556333	Gohir.A05G150500
1kb_07vs25_upregulated_SNPs	i26271Gh	A05	15432372	Gohir.A05G158600
1kb_07vs25_upregulated_SNPs	i29279Gh	A05	87383003	Gohir.A05G355800
1kb_07vs25_upregulated_SNPs	i25053Gh	A05	95365485	Gohir.A05G384300
1kb_07vs25_upregulated_SNPs	i33647Gh	A06	119041602	Gohir.A06G186200
1kb_07vs25_upregulated_SNPs	i42454Gh	A07	15849447	Gohir.A07G095000
1kb_07vs25_upregulated_SNPs	i44304Gh	A07	27728128	Gohir.A07G132300
1kb_07vs25_upregulated_SNPs	i30504Gh	A09	71304551	Gohir.A09G143900
1kb_07vs25_upregulated_SNPs	i45520Gh	A10	4289365	Gohir.A10G044500
1kb_07vs25_upregulated_SNPs	i24912Gh	A11	196088	Gohir.A11G001700
1kb_07vs25_upregulated_SNPs	i46232Gh	A11	15105353	Gohir.A11G130800
1kb_07vs25_upregulated_SNPs	i41630Gh	A11	114226503	Gohir.A11G329000
1kb_07vs25_upregulated_SNPs	i08295Gh	A12	95776221	Gohir.A12G204800
1kb_07vs25_upregulated_SNPs	i02287Gh	D01	2246149	Gohir.D01G024900
1kb_07vs25_upregulated_SNPs	i02563Gh	D01	16940857	Gohir.D01G097500
1kb_07vs25_upregulated_SNPs	i26129Gh	D01	56630057	Gohir.D01G168000
1kb_07vs25_upregulated_SNPs	i52906Gb	D01	61038294	Gohir.D01G191900
1kb_07vs25_upregulated_SNPs	i52932Gb	D01	61038294	Gohir.D01G191900
1kb_07vs25_upregulated_SNPs	i61359Gt	D01	61038294	Gohir.D01G191900
1kb_07vs25_upregulated_SNPs	i03005Gh	D01	62358539	Gohir.D01G199900
1kb_07vs25_upregulated_SNPs	i04952Gh	D02	2679681	Gohir.D02G020100
1kb_07vs25_upregulated_SNPs	i05024Gh	D02	4569502	Gohir.D02G035800
1kb_07vs25_upregulated_SNPs	i05025Gh	D02	4574422	Gohir.D02G035800
1kb_07vs25_upregulated_SNPs	i15393Gh	D02	6522812	Gohir.D02G050000
1kb_07vs25_upregulated_SNPs	i05631Gh	D02	67049234	Gohir.D02G198100
1kb_07vs25_upregulated_SNPs	i05698Gh	D02	68163328	Gohir.D02G207200
1kb_07vs25_upregulated_SNPs	i03134Gh	D03	875793	Gohir.D03G011800
1kb_07vs25_upregulated_SNPs	i47328Gh	D03	1656780	Gohir.D03G019400
1kb_07vs25_upregulated_SNPs	i03211Gh	D03	3551956	Gohir.D03G032100
1kb_07vs25_upregulated_SNPs	i46371Gh	D03	36480235	Gohir.D03G094800
1kb_07vs25_upregulated_SNPs	i03434Gh	D03	44486004	Gohir.D03G122700
1kb_07vs25_upregulated_SNPs	i12859Gh	D04	53044377	Gohir.D04G161600
1kb_07vs25_upregulated_SNPs	i20228Gh	D04	55036628	Gohir.D04G178000
1kb_07vs25_upregulated_SNPs	i08788Gh	D05	596180	Gohir.D05G005300
1kb_07vs25_upregulated_SNPs	i09046Gh	D05	5117712	Gohir.D05G061300
1kb_07vs25_upregulated_SNPs	i09051Gh	D05	5184745	Gohir.D05G062500
1kb_07vs25_upregulated_SNPs	i09052Gh	D05	5185145	Gohir.D05G062500
1kb_07vs25_upregulated_SNPs	i09055Gh	D05	5249341	Gohir.D05G063300
1kb_07vs25_upregulated_SNPs	i09093Gh	D05	5509769	Gohir.D05G066800
1kb_07vs25_upregulated_SNPs	i09094Gh	D05	5511264	Gohir.D05G066800
1kb_07vs25_upregulated_SNPs	i09138Gh	D05	6935462	Gohir.D05G082200
1kb_07vs25_upregulated_SNPs	i09201Gh	D05	8476054	Gohir.D05G099800
1kb_07vs25_upregulated_SNPs	i09231Gh	D05	9032256	Gohir.D05G105200
1kb_07vs25_upregulated_SNPs	i09236Gh	D05	9063686	Gohir.D05G105700
1kb_07vs25_upregulated_SNPs	i00193Gh	D05	10881545	Gohir.D05G124500
1kb_07vs25_upregulated_SNPs	i09312Gh	D05	11024796	Gohir.D05G125700
1kb_07vs25_upregulated_SNPs	i09474Gh	D05	13879218	Gohir.D05G155600
1kb_07vs25_upregulated_SNPs	i69754Gl	D05	14466952	Gohir.D05G161200
1kb_07vs25_upregulated_SNPs	i09665Gh	D05	19789458	Gohir.D05G218200
1kb_07vs25_upregulated_SNPs	i10543Gh	D06	667787	Gohir.D06G007100
1kb_07vs25_upregulated_SNPs	i17083Gh	D06	774102	Gohir.D06G007900
1kb_07vs25_upregulated_SNPs	i39917Gh	D06	1514210	Gohir.D06G014600
1kb_07vs25_upregulated_SNPs	i10695Gh	D06	2463743	Gohir.D06G022900
1kb_07vs25_upregulated_SNPs	i00428Gh	D06	27249767	Gohir.D06G108300
1kb_07vs25_upregulated_SNPs	i01290Gh	D07	1077169	Gohir.D07G009500
1kb_07vs25_upregulated_SNPs	i01302Gh	D07	1308247	Gohir.D07G011400
1kb_07vs25_upregulated_SNPs	i00985Gh	D07	1310836	Gohir.D07G011400
1kb_07vs25_upregulated_SNPs	i14296Gh	D07	1311124	Gohir.D07G011400
1kb_07vs25_upregulated_SNPs	i01383Gh	D07	3164720	Gohir.D07G029200
1kb_07vs25_upregulated_SNPs	i01692Gh	D07	14984994	Gohir.D07G108900
1kb_07vs25_upregulated_SNPs	i01801Gh	D07	20636995	Gohir.D07G131800
1kb_07vs25_upregulated_SNPs	i03860Gh	D08	2869798	Gohir.D08G029600
1kb_07vs25_upregulated_SNPs	i03950Gh	D08	5154614	Gohir.D08G049000
1kb_07vs25_upregulated_SNPs	i15023Gh	D08	5155013	Gohir.D08G049000
1kb_07vs25_upregulated_SNPs	i15024Gh	D08	5155088	Gohir.D08G049000
1kb_07vs25_upregulated_SNPs	i46484Gh	D08	38323416	Gohir.D08G117900
1kb_07vs25_upregulated_SNPs	i04392Gh	D08	53285169	Gohir.D08G162900
1kb_07vs25_upregulated_SNPs	i04521Gh	D08	61095762	Gohir.D08G199900
1kb_07vs25_upregulated_SNPs	i04620Gh	D08	63935990	Gohir.D08G217700
1kb_07vs25_upregulated_SNPs	i06518Gh	D09	49687457	Gohir.D09G205500
1kb_07vs25_upregulated_SNPs	i47709Gh	D10	1175083	Gohir.D10G013700
1kb_07vs25_upregulated_SNPs	i17537Gh	D10	47723857	Gohir.D10G164200
1kb_07vs25_upregulated_SNPs	i17539Gh	D10	47724034	Gohir.D10G164200
1kb_07vs25_upregulated_SNPs	i14092Gh	D11	3474406	Gohir.D11G041400
1kb_07vs25_upregulated_SNPs	i07328Gh	D11	24425579	Gohir.D11G196600
1kb_07vs25_upregulated_SNPs	i07880Gh	D12	4253847	Gohir.D12G032800
1kb_07vs25_upregulated_SNPs	i08597Gh	D12	59587653	Gohir.D12G233200
1kb_07vs25_upregulated_SNPs	i41619Gh	D13	49270504	Gohir.D13G139300
1kb_07vs25_downregulated_SNPs	i41324Gh	A01	4699417	Gohir.A01G043100
1kb_07vs25_downregulated_SNPs	i21057Gh	A01	102275701	Gohir.A01G214800
1kb_07vs25_downregulated_SNPs	i25036Gh	A03	6888749	Gohir.A03G037900
1kb_07vs25_downregulated_SNPs	i39497Gh	A05	2775202	Gohir.A05G028000
1kb_07vs25_downregulated_SNPs	i32176Gh	A05	27315117	Gohir.A05G251000
1kb_07vs25_downregulated_SNPs	i41895Gh	A09	3365387	Gohir.A09G013700
1kb_07vs25_downregulated_SNPs	i31170Gh	A09	73513329	Gohir.A09G162600
1kb_07vs25_downregulated_SNPs	i50617Gb	A11	1156949	Gohir.A11G011700
1kb_07vs25_downregulated_SNPs	i46942Gh	A11	107658726	Gohir.A11G288400
1kb_07vs25_downregulated_SNPs	i02197Gh	D01	636621	Gohir.D01G007900
1kb_07vs25_downregulated_SNPs	i32292Gh	D01	38928176	Gohir.D01G132700
1kb_07vs25_downregulated_SNPs	i50833Gb	D02	148282	Gohir.D02G001800
1kb_07vs25_downregulated_SNPs	i04824Gh	D02	148770	Gohir.D02G001800
1kb_07vs25_downregulated_SNPs	i65397Gm	D02	67211302	Gohir.D02G199300
1kb_07vs25_downregulated_SNPs	i19075Gh	D02	69042716	Gohir.D02G216900
1kb_07vs25_downregulated_SNPs	i05743Gh	D02	69213732	Gohir.D02G218600
1kb_07vs25_downregulated_SNPs	i15617Gh	D02	69596893	Gohir.D02G223900
1kb_07vs25_downregulated_SNPs	i45743Gh	D03	31328523	Gohir.D03G082100
1kb_07vs25_downregulated_SNPs	i08831Gh	D05	1768071	Gohir.D05G018800
1kb_07vs25_downregulated_SNPs	i08832Gh	D05	1768709	Gohir.D05G018800
1kb_07vs25_downregulated_SNPs	i09119Gh	D05	6575046	Gohir.D05G078300
1kb_07vs25_downregulated_SNPs	i09430Gh	D05	13269079	Gohir.D05G149600
1kb_07vs25_downregulated_SNPs	i16720Gh	D05	17408833	Gohir.D05G192900
1kb_07vs25_downregulated_SNPs	i16721Gh	D05	17408902	Gohir.D05G192900
1kb_07vs25_downregulated_SNPs	i09858Gh	D05	25963947	Gohir.D05G264500
1kb_07vs25_downregulated_SNPs	i60860Gt	D05	26003154	Gohir.D05G265000
1kb_07vs25_downregulated_SNPs	i09859Gh	D05	26003266	Gohir.D05G265000
1kb_07vs25_downregulated_SNPs	i10651Gh	D06	2000207	Gohir.D06G019200
1kb_07vs25_downregulated_SNPs	i00735Gh	D06	6447556	Gohir.D06G044000
1kb_07vs25_downregulated_SNPs	i10829Gh	D06	6447556	Gohir.D06G044000
1kb_07vs25_downregulated_SNPs	i01489Gh	D07	6386180	Gohir.D07G056100
1kb_07vs25_downregulated_SNPs	i01517Gh	D07	7180316	Gohir.D07G063300
1kb_07vs25_downregulated_SNPs	i36036Gh	D07	9037473	Gohir.D07G075800
1kb_07vs25_downregulated_SNPs	i44918Gh	D08	32453327	Gohir.D08G110100
1kb_07vs25_downregulated_SNPs	i21442Gh	D08	32456091	Gohir.D08G110100
1kb_07vs25_downregulated_SNPs	i06465Gh	D09	48399765	Gohir.D09G190900
1kb_07vs25_downregulated_SNPs	i06613Gh	D09	51785821	Gohir.D09G228400
1kb_07vs25_downregulated_SNPs	i11500Gh	D10	1110845	Gohir.D10G012800
1kb_07vs25_downregulated_SNPs	i11619Gh	D10	3527294	Gohir.D10G040500
1kb_07vs25_downregulated_SNPs	i15886Gh	D11	1364141	Gohir.D11G014800
1kb_07vs25_downregulated_SNPs	i15887Gh	D11	1364212	Gohir.D11G014800
1kb_07vs25_downregulated_SNPs	i06790Gh	D11	2380464	Gohir.D11G027300
1kb_07vs25_downregulated_SNPs	i16091Gh	D11	61931837	Gohir.D11G277700
1kb_07vs25_downregulated_SNPs	i07879Gh	D12	4108660	Gohir.D12G031800
1kb_07vs25_downregulated_SNPs	i08084Gh	D12	43150216	Gohir.D12G121200
1kb_07vs25_downregulated_SNPs	i08130Gh	D12	45519547	Gohir.D12G135800
1kb_07vs25_downregulated_SNPs	i57557Gb	D12	51698859	Gohir.D12G168800
1kb_07vs25_downregulated_SNPs	i08714Gh	D12	61755728	Gohir.D12G255300
1kb_07vs25_downregulated_SNPs	i12953Gh	D13	82616	Gohir.D13G000800
1kb_07vs25_downregulated_SNPs	i12961Gh	D13	219403	Gohir.D13G002200
1kb_07vs25_downregulated_SNPs	i12984Gh	D13	825751	Gohir.D13G008700
1kb_07vs25_downregulated_SNPs	i45662Gh	D13	1697253	Gohir.D13G018300
1kb_07vs25_downregulated_SNPs	i13805Gh	D13	62493270	Gohir.D13G216400
10kb_07vs25_upregulated_SNPs	i32268Gh	A01	3378865	Gohir.A01G033600
10kb_07vs25_upregulated_SNPs	i52467Gb	A01	7488611	Gohir.A01G057200
10kb_07vs25_upregulated_SNPs	i24000Gh	A01	77598614	Gohir.A01G152500
10kb_07vs25_upregulated_SNPs	i48157Gh	A01	96363012	Gohir.A01G185300
10kb_07vs25_upregulated_SNPs	i37916Gh	A01	98843488	Gohir.A01G194200
10kb_07vs25_upregulated_SNPs	i29713Gh	A01	98906455	Gohir.A01G194600
10kb_07vs25_upregulated_SNPs	i29519Gh	A01	99606896	Gohir.A01G199300
10kb_07vs25_upregulated_SNPs	i31193Gh	A01	99612950	Gohir.A01G199300
10kb_07vs25_upregulated_SNPs	i41400Gh	A01	99656518	Gohir.A01G199600
10kb_07vs25_upregulated_SNPs	i32139Gh	A01	99673971	Gohir.A01G199700
10kb_07vs25_upregulated_SNPs	i35674Gh	A01	102724788	Gohir.A01G219300
10kb_07vs25_upregulated_SNPs	i21744Gh	A01	103826672	Gohir.A01G229900
10kb_07vs25_upregulated_SNPs	i40498Gh	A01	103941653	Gohir.A01G231300
10kb_07vs25_upregulated_SNPs	i31438Gh	A01	103957687	Gohir.A01G231300
10kb_07vs25_upregulated_SNPs	i04948Gh	A02	2375865	Gohir.A02G020200
10kb_07vs25_upregulated_SNPs	i43830Gh	A02	3815283	Gohir.A02G031000
10kb_07vs25_upregulated_SNPs	i22043Gh	A02	4959212	Gohir.A02G038200
10kb_07vs25_upregulated_SNPs	i30467Gh	A02	4959299	Gohir.A02G038200
10kb_07vs25_upregulated_SNPs	i28873Gh	A02	7775432	Gohir.A02G050300
10kb_07vs25_upregulated_SNPs	i27846Gh	A03	3924893	Gohir.A03G025100
10kb_07vs25_upregulated_SNPs	i31031Gh	A03	5861231	Gohir.A03G035000
10kb_07vs25_upregulated_SNPs	i29741Gh	A03	7214651	Gohir.A03G039500
10kb_07vs25_upregulated_SNPs	i00398Gh	A03	8633763	Gohir.A03G045200
10kb_07vs25_upregulated_SNPs	i23798Gh	A03	35741178	Gohir.A03G087900
10kb_07vs25_upregulated_SNPs	i33642Gh	A03	104712973	Gohir.A03G177000
10kb_07vs25_upregulated_SNPs	i23457Gh	A03	105897051	Gohir.A03G186400
10kb_07vs25_upregulated_SNPs	i29716Gh	A04	9049810	Gohir.A04G040100
10kb_07vs25_upregulated_SNPs	i12800Gh	A04	80165138	Gohir.A04G127000
10kb_07vs25_upregulated_SNPs	i00135Gh	A04	80188692	Gohir.A04G127300
10kb_07vs25_upregulated_SNPs	i50654Gb	A05	1764388	Gohir.A05G017700
10kb_07vs25_upregulated_SNPs	i27817Gh	A05	2069694	Gohir.A05G021300
10kb_07vs25_upregulated_SNPs	i29674Gh	A05	2703390	Gohir.A05G027000
10kb_07vs25_upregulated_SNPs	i01144Gh	A05	4307686	Gohir.A05G044100
10kb_07vs25_upregulated_SNPs	i34179Gh	A05	5038366	Gohir.A05G050800
10kb_07vs25_upregulated_SNPs	i46123Gh	A05	5726623	Gohir.A05G059600
10kb_07vs25_upregulated_SNPs	i48397Gh	A05	5833937	Gohir.A05G061200
10kb_07vs25_upregulated_SNPs	i52913Gb	A05	6056670	Gohir.A05G064100
10kb_07vs25_upregulated_SNPs	i22330Gh	A05	7786449	Gohir.A05G081300
10kb_07vs25_upregulated_SNPs	i41358Gh	A05	7789129	Gohir.A05G081300
10kb_07vs25_upregulated_SNPs	i19552Gh	A05	8477676	Gohir.A05G090100
10kb_07vs25_upregulated_SNPs	i52021Gb	A05	13969333	Gohir.A05G144600
10kb_07vs25_upregulated_SNPs	i26015Gh	A05	15151226	Gohir.A05G155500
10kb_07vs25_upregulated_SNPs	i09470Gh	A05	15163456	Gohir.A05G155500
10kb_07vs25_upregulated_SNPs	i26271Gh	A05	15432372	Gohir.A05G158600
10kb_07vs25_upregulated_SNPs	i00260Gh	A05	18227999	Gohir.A05G185900
10kb_07vs25_upregulated_SNPs	i01076Gh	A05	21174801	Gohir.A05G211000
10kb_07vs25_upregulated_SNPs	i41953Gh	A05	21810985	Gohir.A05G216700
10kb_07vs25_upregulated_SNPs	i00321Gh	A05	22450271	Gohir.A05G221500
10kb_07vs25_upregulated_SNPs	i40748Gh	A05	22600390	Gohir.A05G222700
10kb_07vs25_upregulated_SNPs	i41559Gh	A05	24161309	Gohir.A05G234500
10kb_07vs25_upregulated_SNPs	i46592Gh	A05	85323439	Gohir.A05G348300
10kb_07vs25_upregulated_SNPs	i26519Gh	A05	85892917	Gohir.A05G350600
10kb_07vs25_upregulated_SNPs	i38376Gh	A05	93376072	Gohir.A05G376800
10kb_07vs25_upregulated_SNPs	i26019Gh	A05	94894340	Gohir.A05G382100
10kb_07vs25_upregulated_SNPs	i27980Gh	A05	96004562	Gohir.A05G387900
10kb_07vs25_upregulated_SNPs	i39835Gh	A05	96012851	Gohir.A05G387900
10kb_07vs25_upregulated_SNPs	i00221Gh	A05	98752883	Gohir.A05G401700
10kb_07vs25_upregulated_SNPs	i66040Ga	A06	83672	Gohir.A06G001400
10kb_07vs25_upregulated_SNPs	i52593Gb	A06	83960	Gohir.A06G001400
10kb_07vs25_upregulated_SNPs	i17068Gh	A06	95626	Gohir.A06G001800
10kb_07vs25_upregulated_SNPs	i00283Gh	A06	1130277	Gohir.A06G012400
10kb_07vs25_upregulated_SNPs	i61054Gt	A06	1705299	Gohir.A06G017400
10kb_07vs25_upregulated_SNPs	i27774Gh	A06	1956748	Gohir.A06G018700
10kb_07vs25_upregulated_SNPs	i21845Gh	A06	14217968	Gohir.A06G062800
10kb_07vs25_upregulated_SNPs	i50154Gb	A06	19234443	Gohir.A06G074800
10kb_07vs25_upregulated_SNPs	i52949Gb	A06	19234502	Gohir.A06G074800
10kb_07vs25_upregulated_SNPs	i35511Gh	A06	118952874	Gohir.A06G185000
10kb_07vs25_upregulated_SNPs	i29029Gh	A06	118954364	Gohir.A06G185000
10kb_07vs25_upregulated_SNPs	i33647Gh	A06	119041602	Gohir.A06G186200
10kb_07vs25_upregulated_SNPs	i11331Gh	A06	120621675	Gohir.A06G200200
10kb_07vs25_upregulated_SNPs	i50640Gb	A07	1361394	Gohir.A07G011600
10kb_07vs25_upregulated_SNPs	i64291Gm	A07	4720643	Gohir.A07G038300
10kb_07vs25_upregulated_SNPs	i22270Gh	A07	5450350	Gohir.A07G044700
10kb_07vs25_upregulated_SNPs	i26935Gh	A07	22482424	Gohir.A07G117300
10kb_07vs25_upregulated_SNPs	i27188Gh	A07	22852454	Gohir.A07G119000
10kb_07vs25_upregulated_SNPs	i37231Gh	A07	23084736	Gohir.A07G119600
10kb_07vs25_upregulated_SNPs	i27877Gh	A07	25003915	Gohir.A07G124600
10kb_07vs25_upregulated_SNPs	i26814Gh	A07	25021051	Gohir.A07G124600
10kb_07vs25_upregulated_SNPs	i35445Gh	A07	27656584	Gohir.A07G132100
10kb_07vs25_upregulated_SNPs	i38771Gh	A07	43002719	Gohir.A07G154700
10kb_07vs25_upregulated_SNPs	i28107Gh	A07	44246388	Gohir.A07G156100
10kb_07vs25_upregulated_SNPs	i43376Gh	A07	44264529	Gohir.A07G156100
10kb_07vs25_upregulated_SNPs	i46369Gh	A07	85342538	Gohir.A07G189600
10kb_07vs25_upregulated_SNPs	i00429Gh	A08	2523438	Gohir.A08G023200
10kb_07vs25_upregulated_SNPs	i32346Gh	A08	103200009	Gohir.A08G141600
10kb_07vs25_upregulated_SNPs	i47607Gh	A08	106803006	Gohir.A08G151300
10kb_07vs25_upregulated_SNPs	i48390Gh	A08	107799026	Gohir.A08G154200
10kb_07vs25_upregulated_SNPs	i44019Gh	A08	113802824	Gohir.A08G177500
10kb_07vs25_upregulated_SNPs	i32773Gh	A08	113808651	Gohir.A08G177500
10kb_07vs25_upregulated_SNPs	i39186Gh	A08	117732525	Gohir.A08G199000
10kb_07vs25_upregulated_SNPs	i34747Gh	A09	8645879	Gohir.A09G027000
10kb_07vs25_upregulated_SNPs	i30767Gh	A09	8646530	Gohir.A09G027000
10kb_07vs25_upregulated_SNPs	i27174Gh	A09	53414128	Gohir.A09G062900
10kb_07vs25_upregulated_SNPs	i36005Gh	A09	53997505	Gohir.A09G065100
10kb_07vs25_upregulated_SNPs	i40112Gh	A09	67658129	Gohir.A09G121400
10kb_07vs25_upregulated_SNPs	i62860Gt	A09	68073223	Gohir.A09G124500
10kb_07vs25_upregulated_SNPs	i22037Gh	A09	70722264	Gohir.A09G139800
10kb_07vs25_upregulated_SNPs	i30504Gh	A09	71304551	Gohir.A09G143900
10kb_07vs25_upregulated_SNPs	i22655Gh	A09	71360444	Gohir.A09G144100
10kb_07vs25_upregulated_SNPs	i38769Gh	A09	71360444	Gohir.A09G144100
10kb_07vs25_upregulated_SNPs	i00808Gh	A09	71360625	Gohir.A09G144100
10kb_07vs25_upregulated_SNPs	i00903Gh	A09	72531111	Gohir.A09G151700
10kb_07vs25_upregulated_SNPs	i31170Gh	A09	73513329	Gohir.A09G162900
10kb_07vs25_upregulated_SNPs	i00393Gh	A09	75138236	Gohir.A09G177300
10kb_07vs25_upregulated_SNPs	i06405Gh	A09	75560649	Gohir.A09G180900
10kb_07vs25_upregulated_SNPs	i06448Gh	A09	76590184	Gohir.A09G191400
10kb_07vs25_upregulated_SNPs	i06449Gh	A09	76591238	Gohir.A09G191400
10kb_07vs25_upregulated_SNPs	i00880Gh	A09	76592035	Gohir.A09G191800
10kb_07vs25_upregulated_SNPs	i14074Gh	A09	78661079	Gohir.A09G213300
10kb_07vs25_upregulated_SNPs	i06583Gh	A09	80081945	Gohir.A09G229000
10kb_07vs25_upregulated_SNPs	i19251Gh	A09	81620018	Gohir.A09G246000
10kb_07vs25_upregulated_SNPs	i68116Gl	A09	81627875	Gohir.A09G246000
10kb_07vs25_upregulated_SNPs	i22509Gh	A10	754435	Gohir.A10G009500
10kb_07vs25_upregulated_SNPs	i49582Gh	A10	3141077	Gohir.A10G034900
10kb_07vs25_upregulated_SNPs	i00426Gh	A10	3152138	Gohir.A10G034900
10kb_07vs25_upregulated_SNPs	i00425Gh	A10	3152588	Gohir.A10G034900
10kb_07vs25_upregulated_SNPs	i45520Gh	A10	4289365	Gohir.A10G044500
10kb_07vs25_upregulated_SNPs	i36076Gh	A10	4338885	Gohir.A10G045100
10kb_07vs25_upregulated_SNPs	i63442Gm	A10	5686561	Gohir.A10G054300
10kb_07vs25_upregulated_SNPs	i63736Gm	A10	6066761	Gohir.A10G056200
10kb_07vs25_upregulated_SNPs	i47487Gh	A10	24626516	Gohir.A10G107100
10kb_07vs25_upregulated_SNPs	i48450Gh	A10	102593269	Gohir.A10G196300
10kb_07vs25_upregulated_SNPs	i30705Gh	A10	105491197	Gohir.A10G206200
10kb_07vs25_upregulated_SNPs	i51387Gb	A10	108600461	Gohir.A10G221100
10kb_07vs25_upregulated_SNPs	i44024Gh	A10	111036137	Gohir.A10G235900
10kb_07vs25_upregulated_SNPs	i06675Gh	A11	702072	Gohir.A11G007400
10kb_07vs25_upregulated_SNPs	i00366Gh	A11	709658	Gohir.A11G007700
10kb_07vs25_upregulated_SNPs	i06853Gh	A11	4333477	Gohir.A11G047400
10kb_07vs25_upregulated_SNPs	i00202Gh	A11	5817255	Gohir.A11G062800
10kb_07vs25_upregulated_SNPs	i50525Gb	A11	11137000	Gohir.A11G107800
10kb_07vs25_upregulated_SNPs	i00397Gh	A11	13781670	Gohir.A11G124500
10kb_07vs25_upregulated_SNPs	i20872Gh	A11	16078364	Gohir.A11G138400
10kb_07vs25_upregulated_SNPs	i47559Gh	A11	17080346	Gohir.A11G141500
10kb_07vs25_upregulated_SNPs	i00983Gh	A11	17815677	Gohir.A11G147100
10kb_07vs25_upregulated_SNPs	i40251Gh	A11	18005871	Gohir.A11G147900
10kb_07vs25_upregulated_SNPs	i00606Gh	A11	23959241	Gohir.A11G171900
10kb_07vs25_upregulated_SNPs	i22525Gh	A11	98368628	Gohir.A11G251300
10kb_07vs25_upregulated_SNPs	i41630Gh	A11	114226503	Gohir.A11G329000
10kb_07vs25_upregulated_SNPs	i62738Gt	A12	840201	Gohir.A12G007500
10kb_07vs25_upregulated_SNPs	i27852Gh	A12	6766625	Gohir.A12G037200
10kb_07vs25_upregulated_SNPs	i07887Gh	A12	6781297	Gohir.A12G037200
10kb_07vs25_upregulated_SNPs	i35122Gh	A12	86744062	Gohir.A12G155000
10kb_07vs25_upregulated_SNPs	i21885Gh	A12	86771247	Gohir.A12G155000
10kb_07vs25_upregulated_SNPs	i40736Gh	A12	90572648	Gohir.A12G173100
10kb_07vs25_upregulated_SNPs	i39087Gh	A12	93076743	Gohir.A12G186300
10kb_07vs25_upregulated_SNPs	i08297Gh	A12	95783325	Gohir.A12G204800
10kb_07vs25_upregulated_SNPs	i27042Gh	A12	95784224	Gohir.A12G204800
10kb_07vs25_upregulated_SNPs	i47671Gh	A12	95864347	Gohir.A12G205800
10kb_07vs25_upregulated_SNPs	i69247Gl	A12	99637376	Gohir.A12G241600
10kb_07vs25_upregulated_SNPs	i36964Gh	A13	26860127	Gohir.A13G078300
10kb_07vs25_upregulated_SNPs	i45982Gh	A13	54198138	Gohir.A13G094800
10kb_07vs25_upregulated_SNPs	i32205Gh	A13	54202614	Gohir.A13G094800
10kb_07vs25_upregulated_SNPs	i35912Gh	A13	59766865	Gohir.A13G099100
10kb_07vs25_upregulated_SNPs	i24916Gh	A13	68343934	Gohir.A13G107000
10kb_07vs25_upregulated_SNPs	i39519Gh	A13	75079978	Gohir.A13G116600
10kb_07vs25_upregulated_SNPs	i45252Gh	A13	75649550	Gohir.A13G117000
10kb_07vs25_upregulated_SNPs	i39337Gh	A13	76588491	Gohir.A13G117700
10kb_07vs25_upregulated_SNPs	i47110Gh	A13	93926992	Gohir.A13G158800
10kb_07vs25_upregulated_SNPs	i51950Gb	A13	100094196	Gohir.A13G193700
10kb_07vs25_upregulated_SNPs	i00484Gh	A13	100094680	Gohir.A13G193700
10kb_07vs25_upregulated_SNPs	i02208Gh	D01	824062	Gohir.D01G009200
10kb_07vs25_upregulated_SNPs	i18370Gh	D01	824760	Gohir.D01G009200
10kb_07vs25_upregulated_SNPs	i02209Gh	D01	824840	Gohir.D01G009200
10kb_07vs25_upregulated_SNPs	i02243Gh	D01	1542567	Gohir.D01G017500
10kb_07vs25_upregulated_SNPs	i46850Gh	D01	1991935	Gohir.D01G022300
10kb_07vs25_upregulated_SNPs	i02288Gh	D01	2248710	Gohir.D01G024900
10kb_07vs25_upregulated_SNPs	i02315Gh	D01	2599312	Gohir.D01G026600
10kb_07vs25_upregulated_SNPs	i02316Gh	D01	2599414	Gohir.D01G026600
10kb_07vs25_upregulated_SNPs	i31026Gh	D01	4383006	Gohir.D01G039200
10kb_07vs25_upregulated_SNPs	i34009Gh	D01	5106685	Gohir.D01G043400
10kb_07vs25_upregulated_SNPs	i02538Gh	D01	15150243	Gohir.D01G088300
10kb_07vs25_upregulated_SNPs	i34643Gh	D01	21194248	Gohir.D01G109700
10kb_07vs25_upregulated_SNPs	i34837Gh	D01	23317471	Gohir.D01G112100
10kb_07vs25_upregulated_SNPs	i39657Gh	D01	26026339	Gohir.D01G116900
10kb_07vs25_upregulated_SNPs	i36244Gh	D01	38194953	Gohir.D01G131800
10kb_07vs25_upregulated_SNPs	i30341Gh	D01	39388638	Gohir.D01G133300
10kb_07vs25_upregulated_SNPs	i33133Gh	D01	39402770	Gohir.D01G133300
10kb_07vs25_upregulated_SNPs	i02681Gh	D01	41047960	Gohir.D01G134500
10kb_07vs25_upregulated_SNPs	i02680Gh	D01	41048730	Gohir.D01G134500
10kb_07vs25_upregulated_SNPs	i02677Gh	D01	41849562	Gohir.D01G135500
10kb_07vs25_upregulated_SNPs	i30908Gh	D01	44482297	Gohir.D01G140900
10kb_07vs25_upregulated_SNPs	i02702Gh	D01	44484746	Gohir.D01G140900
10kb_07vs25_upregulated_SNPs	i02703Gh	D01	44487557	Gohir.D01G140900
10kb_07vs25_upregulated_SNPs	i14700Gh	D01	46027560	Gohir.D01G143700
10kb_07vs25_upregulated_SNPs	i14710Gh	D01	50273221	Gohir.D01G150100
10kb_07vs25_upregulated_SNPs	i02811Gh	D01	56378659	Gohir.D01G166500
10kb_07vs25_upregulated_SNPs	i02812Gh	D01	56379681	Gohir.D01G166500
10kb_07vs25_upregulated_SNPs	i02882Gh	D01	59353580	Gohir.D01G181700
10kb_07vs25_upregulated_SNPs	i02910Gh	D01	59983731	Gohir.D01G184600
10kb_07vs25_upregulated_SNPs	i02928Gh	D01	61034549	Gohir.D01G191900
10kb_07vs25_upregulated_SNPs	i03047Gh	D01	63113032	Gohir.D01G207100
10kb_07vs25_upregulated_SNPs	i49639Gh	D01	63115481	Gohir.D01G207100
10kb_07vs25_upregulated_SNPs	i15341Gh	D02	2671933	Gohir.D02G020100
10kb_07vs25_upregulated_SNPs	i15343Gh	D02	2672284	Gohir.D02G020100
10kb_07vs25_upregulated_SNPs	i15344Gh	D02	2672365	Gohir.D02G020100
10kb_07vs25_upregulated_SNPs	i15345Gh	D02	2672461	Gohir.D02G020100
10kb_07vs25_upregulated_SNPs	i04950Gh	D02	2672953	Gohir.D02G020100
10kb_07vs25_upregulated_SNPs	i15347Gh	D02	2674750	Gohir.D02G020100
10kb_07vs25_upregulated_SNPs	i05022Gh	D02	4567131	Gohir.D02G035800
10kb_07vs25_upregulated_SNPs	i05038Gh	D02	4887483	Gohir.D02G038400
10kb_07vs25_upregulated_SNPs	i05039Gh	D02	4887766	Gohir.D02G038400
10kb_07vs25_upregulated_SNPs	i15373Gh	D02	4888000	Gohir.D02G038400
10kb_07vs25_upregulated_SNPs	i05060Gh	D02	5958083	Gohir.D02G046600
10kb_07vs25_upregulated_SNPs	i18868Gh	D02	6520129	Gohir.D02G050000
10kb_07vs25_upregulated_SNPs	i15392Gh	D02	6521760	Gohir.D02G050000
10kb_07vs25_upregulated_SNPs	i05085Gh	D02	6522072	Gohir.D02G050000
10kb_07vs25_upregulated_SNPs	i61175Gt	D02	6522072	Gohir.D02G050000
10kb_07vs25_upregulated_SNPs	i05086Gh	D02	6744649	Gohir.D02G052100
10kb_07vs25_upregulated_SNPs	i05087Gh	D02	6745120	Gohir.D02G052100
10kb_07vs25_upregulated_SNPs	i05090Gh	D02	6748976	Gohir.D02G052100
10kb_07vs25_upregulated_SNPs	i29992Gh	D02	7652451	Gohir.D02G055900
10kb_07vs25_upregulated_SNPs	i05105Gh	D02	7730173	Gohir.D02G056600
10kb_07vs25_upregulated_SNPs	i05122Gh	D02	8904845	Gohir.D02G063800
10kb_07vs25_upregulated_SNPs	i45511Gh	D02	17600843	Gohir.D02G089900
10kb_07vs25_upregulated_SNPs	i27231Gh	D02	22261036	Gohir.D02G095500
10kb_07vs25_upregulated_SNPs	i23762Gh	D02	22262831	Gohir.D02G095500
10kb_07vs25_upregulated_SNPs	i05314Gh	D02	51192148	Gohir.D02G140700
10kb_07vs25_upregulated_SNPs	i05316Gh	D02	51193967	Gohir.D02G140700
10kb_07vs25_upregulated_SNPs	i26067Gh	D02	51196200	Gohir.D02G140700
10kb_07vs25_upregulated_SNPs	i25165Gh	D02	55794175	Gohir.D02G150100
10kb_07vs25_upregulated_SNPs	i25181Gh	D02	55947289	Gohir.D02G150800
10kb_07vs25_upregulated_SNPs	i15520Gh	D02	63070154	Gohir.D02G174000
10kb_07vs25_upregulated_SNPs	i15521Gh	D02	63070232	Gohir.D02G174000
10kb_07vs25_upregulated_SNPs	i05521Gh	D02	63178747	Gohir.D02G174800
10kb_07vs25_upregulated_SNPs	i19038Gh	D02	63584399	Gohir.D02G176600
10kb_07vs25_upregulated_SNPs	i45371Gh	D02	64537373	Gohir.D02G181400
10kb_07vs25_upregulated_SNPs	i27766Gh	D02	65638973	Gohir.D02G187400
10kb_07vs25_upregulated_SNPs	i05645Gh	D02	67326294	Gohir.D02G200400
10kb_07vs25_upregulated_SNPs	i05647Gh	D02	67331884	Gohir.D02G200400
10kb_07vs25_upregulated_SNPs	i05648Gh	D02	67332268	Gohir.D02G200400
10kb_07vs25_upregulated_SNPs	i45350Gh	D02	67759947	Gohir.D02G203200
10kb_07vs25_upregulated_SNPs	i05687Gh	D02	67949412	Gohir.D02G205100
10kb_07vs25_upregulated_SNPs	i05692Gh	D02	68022480	Gohir.D02G206200
10kb_07vs25_upregulated_SNPs	i05694Gh	D02	68023387	Gohir.D02G206200
10kb_07vs25_upregulated_SNPs	i05713Gh	D02	68371412	Gohir.D02G209700
10kb_07vs25_upregulated_SNPs	i49621Gh	D02	68793395	Gohir.D02G213900
10kb_07vs25_upregulated_SNPs	i05777Gh	D02	69658176	Gohir.D02G224800
10kb_07vs25_upregulated_SNPs	i65685Gm	D02	69660920	Gohir.D02G224800
10kb_07vs25_upregulated_SNPs	i03086Gh	D03	433118	Gohir.D03G006300
10kb_07vs25_upregulated_SNPs	i51597Gb	D03	434747	Gohir.D03G006300
10kb_07vs25_upregulated_SNPs	i01073Gh	D03	575199	Gohir.D03G008200
10kb_07vs25_upregulated_SNPs	i00824Gh	D03	575200	Gohir.D03G008200
10kb_07vs25_upregulated_SNPs	i14804Gh	D03	576791	Gohir.D03G008200
10kb_07vs25_upregulated_SNPs	i03100Gh	D03	580067	Gohir.D03G008200
10kb_07vs25_upregulated_SNPs	i18516Gh	D03	886155	Gohir.D03G011800
10kb_07vs25_upregulated_SNPs	i22949Gh	D03	1973992	Gohir.D03G021200
10kb_07vs25_upregulated_SNPs	i03210Gh	D03	3542613	Gohir.D03G032100
10kb_07vs25_upregulated_SNPs	i00652Gh	D03	3556281	Gohir.D03G032100
10kb_07vs25_upregulated_SNPs	i03212Gh	D03	3601798	Gohir.D03G032500
10kb_07vs25_upregulated_SNPs	i03262Gh	D03	10485405	Gohir.D03G055800
10kb_07vs25_upregulated_SNPs	i18550Gh	D03	33364341	Gohir.D03G087000
10kb_07vs25_upregulated_SNPs	i27860Gh	D03	36474192	Gohir.D03G094800
10kb_07vs25_upregulated_SNPs	i67799Ga	D03	43944845	Gohir.D03G120300
10kb_07vs25_upregulated_SNPs	i03435Gh	D03	44486699	Gohir.D03G122700
10kb_07vs25_upregulated_SNPs	i03436Gh	D03	44486951	Gohir.D03G122700
10kb_07vs25_upregulated_SNPs	i03437Gh	D03	44487155	Gohir.D03G122700
10kb_07vs25_upregulated_SNPs	i24075Gh	D03	45175631	Gohir.D03G126300
10kb_07vs25_upregulated_SNPs	i28509Gh	D03	45175975	Gohir.D03G126300
10kb_07vs25_upregulated_SNPs	i03477Gh	D03	46986826	Gohir.D03G134500
10kb_07vs25_upregulated_SNPs	i38610Gh	D03	48587322	Gohir.D03G144500
10kb_07vs25_upregulated_SNPs	i42330Gh	D03	48588744	Gohir.D03G144500
10kb_07vs25_upregulated_SNPs	i03560Gh	D03	48980001	Gohir.D03G146600
10kb_07vs25_upregulated_SNPs	i03620Gh	D03	50245483	Gohir.D03G156100
10kb_07vs25_upregulated_SNPs	i03672Gh	D03	52221633	Gohir.D03G168900
10kb_07vs25_upregulated_SNPs	i12394Gh	D04	1280848	Gohir.D04G009400
10kb_07vs25_upregulated_SNPs	i12397Gh	D04	1288227	Gohir.D04G009400
10kb_07vs25_upregulated_SNPs	i17696Gh	D04	1288472	Gohir.D04G009400
10kb_07vs25_upregulated_SNPs	i17697Gh	D04	1288571	Gohir.D04G009400
10kb_07vs25_upregulated_SNPs	i17699Gh	D04	1289717	Gohir.D04G009400
10kb_07vs25_upregulated_SNPs	i12409Gh	D04	1533714	Gohir.D04G011300
10kb_07vs25_upregulated_SNPs	i12411Gh	D04	1535191	Gohir.D04G011300
10kb_07vs25_upregulated_SNPs	i45150Gh	D04	3942024	Gohir.D04G025500
10kb_07vs25_upregulated_SNPs	i12659Gh	D04	11715994	Gohir.D04G063700
10kb_07vs25_upregulated_SNPs	i12712Gh	D04	44791087	Gohir.D04G126100
10kb_07vs25_upregulated_SNPs	i25575Gh	D04	46351526	Gohir.D04G129800
10kb_07vs25_upregulated_SNPs	i22095Gh	D04	46371006	Gohir.D04G129800
10kb_07vs25_upregulated_SNPs	i36358Gh	D04	46371323	Gohir.D04G129800
10kb_07vs25_upregulated_SNPs	i27870Gh	D04	46373748	Gohir.D04G129800
10kb_07vs25_upregulated_SNPs	i12750Gh	D04	47875422	Gohir.D04G136000
10kb_07vs25_upregulated_SNPs	i26050Gh	D04	51967720	Gohir.D04G152900
10kb_07vs25_upregulated_SNPs	i44683Gh	D04	51982613	Gohir.D04G152900
10kb_07vs25_upregulated_SNPs	i20218Gh	D04	52756176	Gohir.D04G159600
10kb_07vs25_upregulated_SNPs	i12842Gh	D04	52761198	Gohir.D04G159600
10kb_07vs25_upregulated_SNPs	i12849Gh	D04	52842450	Gohir.D04G160000
10kb_07vs25_upregulated_SNPs	i12859Gh	D04	53044377	Gohir.D04G161600
10kb_07vs25_upregulated_SNPs	i12897Gh	D04	53900174	Gohir.D04G169500
10kb_07vs25_upregulated_SNPs	i08789Gh	D05	605421	Gohir.D05G005300
10kb_07vs25_upregulated_SNPs	i44124Gh	D05	938126	Gohir.D05G009400
10kb_07vs25_upregulated_SNPs	i08806Gh	D05	940822	Gohir.D05G009500
10kb_07vs25_upregulated_SNPs	i50012Gb	D05	1927383	Gohir.D05G021000
10kb_07vs25_upregulated_SNPs	i08841Gh	D05	1985988	Gohir.D05G021800
10kb_07vs25_upregulated_SNPs	i08863Gh	D05	2415652	Gohir.D05G026700
10kb_07vs25_upregulated_SNPs	i08943Gh	D05	3814614	Gohir.D05G045700
10kb_07vs25_upregulated_SNPs	i08948Gh	D05	3987332	Gohir.D05G047700
10kb_07vs25_upregulated_SNPs	i08951Gh	D05	4007850	Gohir.D05G047700
10kb_07vs25_upregulated_SNPs	i08952Gh	D05	4008354	Gohir.D05G047700
10kb_07vs25_upregulated_SNPs	i08973Gh	D05	4298718	Gohir.D05G051400
10kb_07vs25_upregulated_SNPs	i08978Gh	D05	4404545	Gohir.D05G052400
10kb_07vs25_upregulated_SNPs	i08996Gh	D05	4539710	Gohir.D05G053800
10kb_07vs25_upregulated_SNPs	i09003Gh	D05	4582065	Gohir.D05G054500
10kb_07vs25_upregulated_SNPs	i09048Gh	D05	5153621	Gohir.D05G061800
10kb_07vs25_upregulated_SNPs	i16593Gh	D05	5339486	Gohir.D05G064400
10kb_07vs25_upregulated_SNPs	i09076Gh	D05	5365608	Gohir.D05G064900
10kb_07vs25_upregulated_SNPs	i09091Gh	D05	5504284	Gohir.D05G066700
10kb_07vs25_upregulated_SNPs	i09093Gh	D05	5509769	Gohir.D05G066800
10kb_07vs25_upregulated_SNPs	i09094Gh	D05	5511264	Gohir.D05G066800
10kb_07vs25_upregulated_SNPs	i09107Gh	D05	6162260	Gohir.D05G073700
10kb_07vs25_upregulated_SNPs	i16608Gh	D05	6279172	Gohir.D05G074800
10kb_07vs25_upregulated_SNPs	i09121Gh	D05	6590821	Gohir.D05G078500
10kb_07vs25_upregulated_SNPs	i00269Gh	D05	6602758	Gohir.D05G078500
10kb_07vs25_upregulated_SNPs	i09139Gh	D05	6939619	Gohir.D05G082200
10kb_07vs25_upregulated_SNPs	i25035Gh	D05	7244525	Gohir.D05G086300
10kb_07vs25_upregulated_SNPs	i09156Gh	D05	7323213	Gohir.D05G087100
10kb_07vs25_upregulated_SNPs	i09202Gh	D05	8485685	Gohir.D05G099800
10kb_07vs25_upregulated_SNPs	i09203Gh	D05	8486980	Gohir.D05G099800
10kb_07vs25_upregulated_SNPs	i44267Gh	D05	9233997	Gohir.D05G107800
10kb_07vs25_upregulated_SNPs	i09246Gh	D05	9236421	Gohir.D05G107800
10kb_07vs25_upregulated_SNPs	i09287Gh	D05	10451826	Gohir.D05G120000
10kb_07vs25_upregulated_SNPs	i09307Gh	D05	10886461	Gohir.D05G124500
10kb_07vs25_upregulated_SNPs	i39020Gh	D05	10890238	Gohir.D05G124500
10kb_07vs25_upregulated_SNPs	i09311Gh	D05	11021725	Gohir.D05G125700
10kb_07vs25_upregulated_SNPs	i09315Gh	D05	11099478	Gohir.D05G127300
10kb_07vs25_upregulated_SNPs	i09319Gh	D05	11155961	Gohir.D05G127800
10kb_07vs25_upregulated_SNPs	i45047Gh	D05	11414559	Gohir.D05G130300
10kb_07vs25_upregulated_SNPs	i09358Gh	D05	12213966	Gohir.D05G138400
10kb_07vs25_upregulated_SNPs	i09368Gh	D05	12383214	Gohir.D05G140400
10kb_07vs25_upregulated_SNPs	i52004Gb	D05	12386730	Gohir.D05G140400
10kb_07vs25_upregulated_SNPs	i09389Gh	D05	12632800	Gohir.D05G142800
10kb_07vs25_upregulated_SNPs	i09407Gh	D05	12937960	Gohir.D05G146700
10kb_07vs25_upregulated_SNPs	i09409Gh	D05	12941001	Gohir.D05G146700
10kb_07vs25_upregulated_SNPs	i09467Gh	D05	13838820	Gohir.D05G155500
10kb_07vs25_upregulated_SNPs	i16696Gh	D05	13886923	Gohir.D05G155600
10kb_07vs25_upregulated_SNPs	i09486Gh	D05	14466186	Gohir.D05G161200
10kb_07vs25_upregulated_SNPs	i69754Gl	D05	14466952	Gohir.D05G161200
10kb_07vs25_upregulated_SNPs	i09487Gh	D05	14470679	Gohir.D05G161200
10kb_07vs25_upregulated_SNPs	i14158Gh	D05	14474236	Gohir.D05G161200
10kb_07vs25_upregulated_SNPs	i44080Gh	D05	16611832	Gohir.D05G185100
10kb_07vs25_upregulated_SNPs	i09541Gh	D05	16680238	Gohir.D05G185400
10kb_07vs25_upregulated_SNPs	i09549Gh	D05	17060848	Gohir.D05G190100
10kb_07vs25_upregulated_SNPs	i47303Gh	D05	17439266	Gohir.D05G193100
10kb_07vs25_upregulated_SNPs	i00462Gh	D05	18557375	Gohir.D05G206100
10kb_07vs25_upregulated_SNPs	i16730Gh	D05	18557515	Gohir.D05G206100
10kb_07vs25_upregulated_SNPs	i00461Gh	D05	18557591	Gohir.D05G206100
10kb_07vs25_upregulated_SNPs	i38854Gh	D05	19230218	Gohir.D05G213000
10kb_07vs25_upregulated_SNPs	i19575Gh	D05	19437865	Gohir.D05G214900
10kb_07vs25_upregulated_SNPs	i65919Ga	D05	19438153	Gohir.D05G214900
10kb_07vs25_upregulated_SNPs	i00665Gh	D05	19780780	Gohir.D05G218200
10kb_07vs25_upregulated_SNPs	i09664Gh	D05	19781521	Gohir.D05G218200
10kb_07vs25_upregulated_SNPs	i50740Gb	D05	19800818	Gohir.D05G218200
10kb_07vs25_upregulated_SNPs	i09666Gh	D05	19802246	Gohir.D05G218200
10kb_07vs25_upregulated_SNPs	i09686Gh	D05	20326322	Gohir.D05G221700
10kb_07vs25_upregulated_SNPs	i46600Gh	D05	21037637	Gohir.D05G227900
10kb_07vs25_upregulated_SNPs	i09781Gh	D05	24369093	Gohir.D05G250700
10kb_07vs25_upregulated_SNPs	i14173Gh	D05	25237064	Gohir.D05G258200
10kb_07vs25_upregulated_SNPs	i09849Gh	D05	25692917	Gohir.D05G261700
10kb_07vs25_upregulated_SNPs	i31337Gh	D05	25766396	Gohir.D05G262400
10kb_07vs25_upregulated_SNPs	i54746Gb	D05	25781875	Gohir.D05G262400
10kb_07vs25_upregulated_SNPs	i19597Gh	D05	26085918	Gohir.D05G265800
10kb_07vs25_upregulated_SNPs	i09874Gh	D05	26099983	Gohir.D05G265800
10kb_07vs25_upregulated_SNPs	i09887Gh	D05	26221417	Gohir.D05G266300
10kb_07vs25_upregulated_SNPs	i09888Gh	D05	26222987	Gohir.D05G266300
10kb_07vs25_upregulated_SNPs	i09889Gh	D05	26223770	Gohir.D05G266300
10kb_07vs25_upregulated_SNPs	i43120Gh	D05	29643866	Gohir.D05G285600
10kb_07vs25_upregulated_SNPs	i31827Gh	D05	30106745	Gohir.D05G288000
10kb_07vs25_upregulated_SNPs	i10311Gh	D05	55381225	Gohir.D05G343500
10kb_07vs25_upregulated_SNPs	i10321Gh	D05	55682601	Gohir.D05G343900
10kb_07vs25_upregulated_SNPs	i10435Gh	D05	60367916	Gohir.D05G364800
10kb_07vs25_upregulated_SNPs	i10445Gh	D05	60998575	Gohir.D05G367900
10kb_07vs25_upregulated_SNPs	i10542Gh	D06	540091	Gohir.D06G005000
10kb_07vs25_upregulated_SNPs	i60789Gt	D06	676226	Gohir.D06G007100
10kb_07vs25_upregulated_SNPs	i10544Gh	D06	677018	Gohir.D06G007100
10kb_07vs25_upregulated_SNPs	i10545Gh	D06	677421	Gohir.D06G007100
10kb_07vs25_upregulated_SNPs	i17080Gh	D06	677766	Gohir.D06G007100
10kb_07vs25_upregulated_SNPs	i17081Gh	D06	677838	Gohir.D06G007100
10kb_07vs25_upregulated_SNPs	i10548Gh	D06	781473	Gohir.D06G007900
10kb_07vs25_upregulated_SNPs	i10609Gh	D06	1520727	Gohir.D06G014600
10kb_07vs25_upregulated_SNPs	i19740Gh	D06	1653533	Gohir.D06G016200
10kb_07vs25_upregulated_SNPs	i52559Gb	D06	1706451	Gohir.D06G016600
10kb_07vs25_upregulated_SNPs	i10624Gh	D06	1717367	Gohir.D06G016600
10kb_07vs25_upregulated_SNPs	i10625Gh	D06	1717473	Gohir.D06G016600
10kb_07vs25_upregulated_SNPs	i49729Gh	D06	1842588	Gohir.D06G018000
10kb_07vs25_upregulated_SNPs	i17136Gh	D06	2002685	Gohir.D06G019300
10kb_07vs25_upregulated_SNPs	i10684Gh	D06	2422539	Gohir.D06G022200
10kb_07vs25_upregulated_SNPs	i10687Gh	D06	2425543	Gohir.D06G022200
10kb_07vs25_upregulated_SNPs	i10688Gh	D06	2425831	Gohir.D06G022200
10kb_07vs25_upregulated_SNPs	i17148Gh	D06	2430373	Gohir.D06G022200
10kb_07vs25_upregulated_SNPs	i10694Gh	D06	2458953	Gohir.D06G022900
10kb_07vs25_upregulated_SNPs	i17151Gh	D06	2468942	Gohir.D06G022900
10kb_07vs25_upregulated_SNPs	i10728Gh	D06	3202145	Gohir.D06G027600
10kb_07vs25_upregulated_SNPs	i10729Gh	D06	3202332	Gohir.D06G027600
10kb_07vs25_upregulated_SNPs	i10730Gh	D06	3204095	Gohir.D06G027600
10kb_07vs25_upregulated_SNPs	i10770Gh	D06	4125791	Gohir.D06G033900
10kb_07vs25_upregulated_SNPs	i10799Gh	D06	5765578	Gohir.D06G040500
10kb_07vs25_upregulated_SNPs	i10807Gh	D06	5886426	Gohir.D06G040900
10kb_07vs25_upregulated_SNPs	i14214Gh	D06	12628977	Gohir.D06G067800
10kb_07vs25_upregulated_SNPs	i17224Gh	D06	12633786	Gohir.D06G067800
10kb_07vs25_upregulated_SNPs	i10954Gh	D06	13962754	Gohir.D06G072700
10kb_07vs25_upregulated_SNPs	i39708Gh	D06	26027968	Gohir.D06G105700
10kb_07vs25_upregulated_SNPs	i25531Gh	D06	28786688	Gohir.D06G110700
10kb_07vs25_upregulated_SNPs	i11242Gh	D06	58591246	Gohir.D06G155800
10kb_07vs25_upregulated_SNPs	i40650Gh	D06	64788170	Gohir.D06G188300
10kb_07vs25_upregulated_SNPs	i01290Gh	D07	1077169	Gohir.D07G009500
10kb_07vs25_upregulated_SNPs	i00986Gh	D07	1311321	Gohir.D07G011400
10kb_07vs25_upregulated_SNPs	i01365Gh	D07	2680024	Gohir.D07G024400
10kb_07vs25_upregulated_SNPs	i01396Gh	D07	3544147	Gohir.D07G033400
10kb_07vs25_upregulated_SNPs	i22123Gh	D07	5930937	Gohir.D07G053000
10kb_07vs25_upregulated_SNPs	i01506Gh	D07	7010095	Gohir.D07G061900
10kb_07vs25_upregulated_SNPs	i23111Gh	D07	7602828	Gohir.D07G066300
10kb_07vs25_upregulated_SNPs	i14351Gh	D07	8808829	Gohir.D07G074900
10kb_07vs25_upregulated_SNPs	i36036Gh	D07	9037473	Gohir.D07G075900
10kb_07vs25_upregulated_SNPs	i01600Gh	D07	10432373	Gohir.D07G084400
10kb_07vs25_upregulated_SNPs	i01639Gh	D07	11729072	Gohir.D07G092300
10kb_07vs25_upregulated_SNPs	i01640Gh	D07	11729613	Gohir.D07G092300
10kb_07vs25_upregulated_SNPs	i01649Gh	D07	12079855	Gohir.D07G095000
10kb_07vs25_upregulated_SNPs	i01651Gh	D07	12092735	Gohir.D07G095000
10kb_07vs25_upregulated_SNPs	i01653Gh	D07	12106464	Gohir.D07G095500
10kb_07vs25_upregulated_SNPs	i42582Gh	D07	14209247	Gohir.D07G105700
10kb_07vs25_upregulated_SNPs	i32531Gh	D07	16454558	Gohir.D07G115400
10kb_07vs25_upregulated_SNPs	i21074Gh	D07	17911462	Gohir.D07G121700
10kb_07vs25_upregulated_SNPs	i46797Gh	D07	20861809	Gohir.D07G132300
10kb_07vs25_upregulated_SNPs	i01818Gh	D07	21808008	Gohir.D07G136600
10kb_07vs25_upregulated_SNPs	i43169Gh	D07	21854856	Gohir.D07G137000
10kb_07vs25_upregulated_SNPs	i27519Gh	D07	22890566	Gohir.D07G141400
10kb_07vs25_upregulated_SNPs	i29997Gh	D07	46391961	Gohir.D07G187200
10kb_07vs25_upregulated_SNPs	i24706Gh	D07	46393945	Gohir.D07G187200
10kb_07vs25_upregulated_SNPs	i32498Gh	D07	47310352	Gohir.D07G188900
10kb_07vs25_upregulated_SNPs	i41870Gh	D07	52615316	Gohir.D07G204600
10kb_07vs25_upregulated_SNPs	i44916Gh	D07	53876602	Gohir.D07G211900
10kb_07vs25_upregulated_SNPs	i03753Gh	D08	944124	Gohir.D08G012100
10kb_07vs25_upregulated_SNPs	i03822Gh	D08	2318317	Gohir.D08G025600
10kb_07vs25_upregulated_SNPs	i34638Gh	D08	2860379	Gohir.D08G029600
10kb_07vs25_upregulated_SNPs	i01143Gh	D08	2861931	Gohir.D08G029600
10kb_07vs25_upregulated_SNPs	i64921Gm	D08	2862490	Gohir.D08G029600
10kb_07vs25_upregulated_SNPs	i48272Gh	D08	2863955	Gohir.D08G029600
10kb_07vs25_upregulated_SNPs	i03930Gh	D08	4538571	Gohir.D08G044100
10kb_07vs25_upregulated_SNPs	i03931Gh	D08	4538728	Gohir.D08G044100
10kb_07vs25_upregulated_SNPs	i03951Gh	D08	5155630	Gohir.D08G049000
10kb_07vs25_upregulated_SNPs	i03952Gh	D08	5161743	Gohir.D08G049000
10kb_07vs25_upregulated_SNPs	i03960Gh	D08	5404819	Gohir.D08G050700
10kb_07vs25_upregulated_SNPs	i03962Gh	D08	5420140	Gohir.D08G050700
10kb_07vs25_upregulated_SNPs	i23707Gh	D08	17804960	Gohir.D08G092200
10kb_07vs25_upregulated_SNPs	i38700Gh	D08	19246189	Gohir.D08G093900
10kb_07vs25_upregulated_SNPs	i32108Gh	D08	24369501	Gohir.D08G098700
10kb_07vs25_upregulated_SNPs	i04165Gh	D08	25453305	Gohir.D08G101000
10kb_07vs25_upregulated_SNPs	i15097Gh	D08	36864588	Gohir.D08G114900
10kb_07vs25_upregulated_SNPs	i35832Gh	D08	36876915	Gohir.D08G114900
10kb_07vs25_upregulated_SNPs	i21464Gh	D08	37586088	Gohir.D08G116800
10kb_07vs25_upregulated_SNPs	i23472Gh	D08	38398591	Gohir.D08G118100
10kb_07vs25_upregulated_SNPs	i04423Gh	D08	55872362	Gohir.D08G173600
10kb_07vs25_upregulated_SNPs	i04427Gh	D08	55993038	Gohir.D08G174400
10kb_07vs25_upregulated_SNPs	i33227Gh	D08	59728168	Gohir.D08G192100
10kb_07vs25_upregulated_SNPs	i15176Gh	D08	61467804	Gohir.D08G202200
10kb_07vs25_upregulated_SNPs	i15177Gh	D08	61467902	Gohir.D08G202200
10kb_07vs25_upregulated_SNPs	i15211Gh	D08	64133621	Gohir.D08G219400
10kb_07vs25_upregulated_SNPs	i15212Gh	D08	64133685	Gohir.D08G219400
10kb_07vs25_upregulated_SNPs	i04710Gh	D08	66273703	Gohir.D08G236900
10kb_07vs25_upregulated_SNPs	i04711Gh	D08	66286372	Gohir.D08G236900
10kb_07vs25_upregulated_SNPs	i04799Gh	D08	68306166	Gohir.D08G254900
10kb_07vs25_upregulated_SNPs	i46878Gh	D09	5235172	Gohir.D09G016600
10kb_07vs25_upregulated_SNPs	i06017Gh	D09	33142440	Gohir.D09G076200
10kb_07vs25_upregulated_SNPs	i31176Gh	D09	36244763	Gohir.D09G093700
10kb_07vs25_upregulated_SNPs	i36390Gh	D09	37713271	Gohir.D09G102700
10kb_07vs25_upregulated_SNPs	i06171Gh	D09	40668082	Gohir.D09G121500
10kb_07vs25_upregulated_SNPs	i36407Gh	D09	42173223	Gohir.D09G132500
10kb_07vs25_upregulated_SNPs	i60841Gt	D09	44094714	Gohir.D09G147400
10kb_07vs25_upregulated_SNPs	i19236Gh	D09	44097359	Gohir.D09G147400
10kb_07vs25_upregulated_SNPs	i37670Gh	D09	44497405	Gohir.D09G151300
10kb_07vs25_upregulated_SNPs	i06362Gh	D09	45627469	Gohir.D09G163600
10kb_07vs25_upregulated_SNPs	i06363Gh	D09	45628405	Gohir.D09G163600
10kb_07vs25_upregulated_SNPs	i34232Gh	D09	45791527	Gohir.D09G165300
10kb_07vs25_upregulated_SNPs	i15795Gh	D09	46472282	Gohir.D09G171500
10kb_07vs25_upregulated_SNPs	i26678Gh	D09	46676022	Gohir.D09G173100
10kb_07vs25_upregulated_SNPs	i23862Gh	D09	46677028	Gohir.D09G173100
10kb_07vs25_upregulated_SNPs	i39176Gh	D09	46679582	Gohir.D09G173100
10kb_07vs25_upregulated_SNPs	i06445Gh	D09	48015790	Gohir.D09G186200
10kb_07vs25_upregulated_SNPs	i15821Gh	D09	49152550	Gohir.D09G199000
10kb_07vs25_upregulated_SNPs	i06499Gh	D09	49153097	Gohir.D09G199000
10kb_07vs25_upregulated_SNPs	i15823Gh	D09	49155358	Gohir.D09G199000
10kb_07vs25_upregulated_SNPs	i06507Gh	D09	49320807	Gohir.D09G200500
10kb_07vs25_upregulated_SNPs	i06518Gh	D09	49687457	Gohir.D09G205500
10kb_07vs25_upregulated_SNPs	i06520Gh	D09	49690854	Gohir.D09G205500
10kb_07vs25_upregulated_SNPs	i15829Gh	D09	49700571	Gohir.D09G205500
10kb_07vs25_upregulated_SNPs	i06522Gh	D09	49701011	Gohir.D09G205500
10kb_07vs25_upregulated_SNPs	i15830Gh	D09	49707487	Gohir.D09G205500
10kb_07vs25_upregulated_SNPs	i60818Gt	D09	50985184	Gohir.D09G220500
10kb_07vs25_upregulated_SNPs	i21327Gh	D09	51742719	Gohir.D09G227700
10kb_07vs25_upregulated_SNPs	i11480Gh	D10	527989	Gohir.D10G005700
10kb_07vs25_upregulated_SNPs	i11504Gh	D10	1162324	Gohir.D10G013700
10kb_07vs25_upregulated_SNPs	i11506Gh	D10	1179482	Gohir.D10G013700
10kb_07vs25_upregulated_SNPs	i11507Gh	D10	1181934	Gohir.D10G013700
10kb_07vs25_upregulated_SNPs	i11508Gh	D10	1184090	Gohir.D10G013700
10kb_07vs25_upregulated_SNPs	i11532Gh	D10	1444870	Gohir.D10G016600
10kb_07vs25_upregulated_SNPs	i11553Gh	D10	2146118	Gohir.D10G024700
10kb_07vs25_upregulated_SNPs	i11556Gh	D10	2198458	Gohir.D10G025100
10kb_07vs25_upregulated_SNPs	i39228Gh	D10	3207196	Gohir.D10G036600
10kb_07vs25_upregulated_SNPs	i11595Gh	D10	3220375	Gohir.D10G036600
10kb_07vs25_upregulated_SNPs	i11602Gh	D10	3312248	Gohir.D10G037700
10kb_07vs25_upregulated_SNPs	i11604Gh	D10	3313370	Gohir.D10G037700
10kb_07vs25_upregulated_SNPs	i51628Gb	D10	3316165	Gohir.D10G037700
10kb_07vs25_upregulated_SNPs	i11620Gh	D10	3539235	Gohir.D10G040800
10kb_07vs25_upregulated_SNPs	i11621Gh	D10	3541275	Gohir.D10G040800
10kb_07vs25_upregulated_SNPs	i11670Gh	D10	5017411	Gohir.D10G053600
10kb_07vs25_upregulated_SNPs	i47898Gh	D10	5019118	Gohir.D10G053600
10kb_07vs25_upregulated_SNPs	i45071Gh	D10	5029297	Gohir.D10G053700
10kb_07vs25_upregulated_SNPs	i17540Gh	D10	47728506	Gohir.D10G164200
10kb_07vs25_upregulated_SNPs	i24986Gh	D10	55195206	Gohir.D10G187900
10kb_07vs25_upregulated_SNPs	i12138Gh	D10	58757595	Gohir.D10G202400
10kb_07vs25_upregulated_SNPs	i17574Gh	D10	58772384	Gohir.D10G202400
10kb_07vs25_upregulated_SNPs	i54229Gb	D10	58772500	Gohir.D10G202400
10kb_07vs25_upregulated_SNPs	i12150Gh	D10	59141054	Gohir.D10G204700
10kb_07vs25_upregulated_SNPs	i48108Gh	D10	59424594	Gohir.D10G205800
10kb_07vs25_upregulated_SNPs	i17600Gh	D10	62033733	Gohir.D10G217600
10kb_07vs25_upregulated_SNPs	i41671Gh	D10	65065998	Gohir.D10G233300
10kb_07vs25_upregulated_SNPs	i17620Gh	D10	65094732	Gohir.D10G233500
10kb_07vs25_upregulated_SNPs	i22404Gh	D10	67746871	Gohir.D10G252300
10kb_07vs25_upregulated_SNPs	i06682Gh	D11	870587	Gohir.D11G009300
10kb_07vs25_upregulated_SNPs	i06702Gh	D11	1165308	Gohir.D11G012500
10kb_07vs25_upregulated_SNPs	i06723Gh	D11	1536792	Gohir.D11G017000
10kb_07vs25_upregulated_SNPs	i15896Gh	D11	1693954	Gohir.D11G018600
10kb_07vs25_upregulated_SNPs	i06779Gh	D11	2284753	Gohir.D11G026500
10kb_07vs25_upregulated_SNPs	i06780Gh	D11	2288450	Gohir.D11G026500
10kb_07vs25_upregulated_SNPs	i06812Gh	D11	2964117	Gohir.D11G035100
10kb_07vs25_upregulated_SNPs	i14092Gh	D11	3474406	Gohir.D11G041400
10kb_07vs25_upregulated_SNPs	i06845Gh	D11	3692219	Gohir.D11G043900
10kb_07vs25_upregulated_SNPs	i06846Gh	D11	3694323	Gohir.D11G043900
10kb_07vs25_upregulated_SNPs	i06870Gh	D11	4328067	Gohir.D11G050600
10kb_07vs25_upregulated_SNPs	i06877Gh	D11	4728163	Gohir.D11G053700
10kb_07vs25_upregulated_SNPs	i06880Gh	D11	4782502	Gohir.D11G054500
10kb_07vs25_upregulated_SNPs	i06881Gh	D11	4783865	Gohir.D11G054500
10kb_07vs25_upregulated_SNPs	i38417Gh	D11	12511712	Gohir.D11G127800
10kb_07vs25_upregulated_SNPs	i41675Gh	D11	17770843	Gohir.D11G164800
10kb_07vs25_upregulated_SNPs	i21605Gh	D11	18967848	Gohir.D11G171000
10kb_07vs25_upregulated_SNPs	i07327Gh	D11	24425041	Gohir.D11G196600
10kb_07vs25_upregulated_SNPs	i68247Gl	D11	61404846	Gohir.D11G275200
10kb_07vs25_upregulated_SNPs	i07767Gh	D12	503318	Gohir.D12G003400
10kb_07vs25_upregulated_SNPs	i29942Gh	D12	508452	Gohir.D12G003400
10kb_07vs25_upregulated_SNPs	i19397Gh	D12	791582	Gohir.D12G006500
10kb_07vs25_upregulated_SNPs	i16221Gh	D12	794161	Gohir.D12G006500
10kb_07vs25_upregulated_SNPs	i07782Gh	D12	820609	Gohir.D12G006900
10kb_07vs25_upregulated_SNPs	i07783Gh	D12	837727	Gohir.D12G006900
10kb_07vs25_upregulated_SNPs	i36260Gh	D12	1225839	Gohir.D12G010700
10kb_07vs25_upregulated_SNPs	i16231Gh	D12	1370273	Gohir.D12G011800
10kb_07vs25_upregulated_SNPs	i07819Gh	D12	2062604	Gohir.D12G017400
10kb_07vs25_upregulated_SNPs	i07834Gh	D12	2777996	Gohir.D12G022400
10kb_07vs25_upregulated_SNPs	i07835Gh	D12	2784417	Gohir.D12G022400
10kb_07vs25_upregulated_SNPs	i07858Gh	D12	3356942	Gohir.D12G026500
10kb_07vs25_upregulated_SNPs	i16251Gh	D12	3923546	Gohir.D12G030300
10kb_07vs25_upregulated_SNPs	i24373Gh	D12	4745256	Gohir.D12G035300
10kb_07vs25_upregulated_SNPs	i32452Gh	D12	10282638	Gohir.D12G058100
10kb_07vs25_upregulated_SNPs	i08169Gh	D12	47535856	Gohir.D12G145600
10kb_07vs25_upregulated_SNPs	i42284Gh	D12	51244595	Gohir.D12G165300
10kb_07vs25_upregulated_SNPs	i08262Gh	D12	51251309	Gohir.D12G165300
10kb_07vs25_upregulated_SNPs	i51807Gb	D12	54828354	Gohir.D12G190400
10kb_07vs25_upregulated_SNPs	i49026Gh	D12	54841588	Gohir.D12G190400
10kb_07vs25_upregulated_SNPs	i08447Gh	D12	56286812	Gohir.D12G201100
10kb_07vs25_upregulated_SNPs	i08461Gh	D12	56404279	Gohir.D12G202900
10kb_07vs25_upregulated_SNPs	i63138Gt	D12	57361410	Gohir.D12G211800
10kb_07vs25_upregulated_SNPs	i45537Gh	D12	58245454	Gohir.D12G220500
10kb_07vs25_upregulated_SNPs	i08560Gh	D12	58943214	Gohir.D12G226700
10kb_07vs25_upregulated_SNPs	i08561Gh	D12	58944146	Gohir.D12G226700
10kb_07vs25_upregulated_SNPs	i14140Gh	D12	58956239	Gohir.D12G226700
10kb_07vs25_upregulated_SNPs	i08598Gh	D12	59589301	Gohir.D12G233200
10kb_07vs25_upregulated_SNPs	i08709Gh	D12	61681099	Gohir.D12G254300
10kb_07vs25_upregulated_SNPs	i08749Gh	D12	62266209	Gohir.D12G260700
10kb_07vs25_upregulated_SNPs	i08761Gh	D12	62348540	Gohir.D12G261400
10kb_07vs25_upregulated_SNPs	i12963Gh	D13	234081	Gohir.D13G002400
10kb_07vs25_upregulated_SNPs	i13001Gh	D13	1444270	Gohir.D13G015300
10kb_07vs25_upregulated_SNPs	i13009Gh	D13	1600457	Gohir.D13G016800
10kb_07vs25_upregulated_SNPs	i13011Gh	D13	1603491	Gohir.D13G016800
10kb_07vs25_upregulated_SNPs	i22781Gh	D13	5091572	Gohir.D13G042600
10kb_07vs25_upregulated_SNPs	i46381Gh	D13	15341741	Gohir.D13G078400
10kb_07vs25_upregulated_SNPs	i45120Gh	D13	20027503	Gohir.D13G087600
10kb_07vs25_upregulated_SNPs	i18351Gh	D13	26002415	Gohir.D13G096900
10kb_07vs25_upregulated_SNPs	i34898Gh	D13	41783223	Gohir.D13G122300
10kb_07vs25_upregulated_SNPs	i23631Gh	D13	42240219	Gohir.D13G123200
10kb_07vs25_upregulated_SNPs	i30825Gh	D13	42831550	Gohir.D13G124800
10kb_07vs25_upregulated_SNPs	i30361Gh	D13	49420998	Gohir.D13G140200
10kb_07vs25_upregulated_SNPs	i36840Gh	D13	49422024	Gohir.D13G140200
10kb_07vs25_upregulated_SNPs	i13450Gh	D13	50655735	Gohir.D13G145600
10kb_07vs25_upregulated_SNPs	i13582Gh	D13	56527359	Gohir.D13G170400
10kb_07vs25_upregulated_SNPs	i13583Gh	D13	56527871	Gohir.D13G170400
10kb_07vs25_upregulated_SNPs	i43889Gh	D13	56538226	Gohir.D13G170400
10kb_07vs25_upregulated_SNPs	i11420Gh	D13	57756253	Gohir.D13G178700
10kb_07vs25_upregulated_SNPs	i11418Gh	D13	57766262	Gohir.D13G178700
10kb_07vs25_upregulated_SNPs	i13687Gh	D13	59568525	Gohir.D13G193100
10kb_07vs25_upregulated_SNPs	i50952Gb	D13	59807591	Gohir.D13G195300
10kb_07vs25_upregulated_SNPs	i13697Gh	D13	60113368	Gohir.D13G198100
10kb_07vs25_upregulated_SNPs	i13698Gh	D13	60116051	Gohir.D13G198100
10kb_07vs25_upregulated_SNPs	i13711Gh	D13	60489279	Gohir.D13G201200
10kb_07vs25_upregulated_SNPs	i29916Gh	D13	60545709	Gohir.D13G201800
10kb_07vs25_upregulated_SNPs	i13737Gh	D13	61184431	Gohir.D13G207500
10kb_07vs25_upregulated_SNPs	i18126Gh	D13	61184831	Gohir.D13G207500
10kb_07vs25_upregulated_SNPs	i13740Gh	D13	61204437	Gohir.D13G207500
10kb_07vs25_upregulated_SNPs	i13839Gh	D13	62847291	Gohir.D13G220200
10kb_07vs25_upregulated_SNPs	i20388Gh	D13	63219314	Gohir.D13G224000
10kb_07vs25_downregulated_SNPs	i32268Gh	A01	3378865	Gohir.A01G033700
10kb_07vs25_downregulated_SNPs	i45036Gh	A01	4001703	Gohir.A01G039400
10kb_07vs25_downregulated_SNPs	i44101Gh	A01	96897192	Gohir.A01G186500
10kb_07vs25_downregulated_SNPs	i37932Gh	A01	98963365	Gohir.A01G195000
10kb_07vs25_downregulated_SNPs	i41884Gh	A01	100090125	Gohir.A01G201800
10kb_07vs25_downregulated_SNPs	i48294Gh	A01	100230406	Gohir.A01G202700
10kb_07vs25_downregulated_SNPs	i55389Gb	A01	101362854	Gohir.A01G208300
10kb_07vs25_downregulated_SNPs	i22285Gh	A01	101998207	Gohir.A01G212400
10kb_07vs25_downregulated_SNPs	i31404Gh	A01	102046720	Gohir.A01G213000
10kb_07vs25_downregulated_SNPs	i25839Gh	A01	102497125	Gohir.A01G216900
10kb_07vs25_downregulated_SNPs	i36073Gh	A01	102747224	Gohir.A01G219700
10kb_07vs25_downregulated_SNPs	i23867Gh	A01	102856016	Gohir.A01G220700
10kb_07vs25_downregulated_SNPs	i21201Gh	A01	103649118	Gohir.A01G227500
10kb_07vs25_downregulated_SNPs	i27550Gh	A02	3714199	Gohir.A02G030200
10kb_07vs25_downregulated_SNPs	i51490Gb	A03	1293622	Gohir.A03G008500
10kb_07vs25_downregulated_SNPs	i26677Gh	A03	4551855	Gohir.A03G028200
10kb_07vs25_downregulated_SNPs	i25036Gh	A03	6888749	Gohir.A03G037900
10kb_07vs25_downregulated_SNPs	i29903Gh	A03	6996326	Gohir.A03G038500
10kb_07vs25_downregulated_SNPs	i42053Gh	A03	9042776	Gohir.A03G047400
10kb_07vs25_downregulated_SNPs	i34190Gh	A03	96973038	Gohir.A03G146900
10kb_07vs25_downregulated_SNPs	i39617Gh	A03	98622164	Gohir.A03G150400
10kb_07vs25_downregulated_SNPs	i23578Gh	A03	106001799	Gohir.A03G187500
10kb_07vs25_downregulated_SNPs	i35063Gh	A03	106095832	Gohir.A03G188800
10kb_07vs25_downregulated_SNPs	i38241Gh	A03	106829008	Gohir.A03G194600
10kb_07vs25_downregulated_SNPs	i22784Gh	A04	82553580	Gohir.A04G146700
10kb_07vs25_downregulated_SNPs	i50654Gb	A05	1764388	Gohir.A05G017900
10kb_07vs25_downregulated_SNPs	i47407Gh	A05	5208444	Gohir.A05G052500
10kb_07vs25_downregulated_SNPs	i09066Gh	A05	6002241	Gohir.A05G063100
10kb_07vs25_downregulated_SNPs	i09067Gh	A05	6002699	Gohir.A05G063100
10kb_07vs25_downregulated_SNPs	i25505Gh	A05	9925242	Gohir.A05G106600
10kb_07vs25_downregulated_SNPs	i48203Gh	A05	9937921	Gohir.A05G106600
10kb_07vs25_downregulated_SNPs	i00320Gh	A05	14026125	Gohir.A05G145500
10kb_07vs25_downregulated_SNPs	i45478Gh	A05	14154947	Gohir.A05G147100
10kb_07vs25_downregulated_SNPs	i09426Gh	A05	14482764	Gohir.A05G149800
10kb_07vs25_downregulated_SNPs	i52708Gb	A05	14483649	Gohir.A05G149800
10kb_07vs25_downregulated_SNPs	i40232Gh	A05	15400434	Gohir.A05G158000
10kb_07vs25_downregulated_SNPs	i09498Gh	A05	16498160	Gohir.A05G167300
10kb_07vs25_downregulated_SNPs	i47763Gh	A05	21120971	Gohir.A05G210800
10kb_07vs25_downregulated_SNPs	i09872Gh	A05	29171994	Gohir.A05G262200
10kb_07vs25_downregulated_SNPs	i28890Gh	A05	31104836	Gohir.A05G271900
10kb_07vs25_downregulated_SNPs	i40163Gh	A05	33515144	Gohir.A05G282500
10kb_07vs25_downregulated_SNPs	i33648Gh	A05	39554907	Gohir.A05G299100
10kb_07vs25_downregulated_SNPs	i48606Gh	A05	45380631	Gohir.A05G306800
10kb_07vs25_downregulated_SNPs	i44532Gh	A05	94054079	Gohir.A05G378400
10kb_07vs25_downregulated_SNPs	i49006Gh	A05	98812663	Gohir.A05G402100
10kb_07vs25_downregulated_SNPs	i44670Gh	A05	98991823	Gohir.A05G403200
10kb_07vs25_downregulated_SNPs	i65892Ga	A06	57914	Gohir.A06G001100
10kb_07vs25_downregulated_SNPs	i51004Gb	A06	1551982	Gohir.A06G015200
10kb_07vs25_downregulated_SNPs	i27774Gh	A06	1956748	Gohir.A06G018600
10kb_07vs25_downregulated_SNPs	i29238Gh	A06	117871426	Gohir.A06G179100
10kb_07vs25_downregulated_SNPs	i01329Gh	A07	1745300	Gohir.A07G014900
10kb_07vs25_downregulated_SNPs	i00333Gh	A07	2294813	Gohir.A07G020200
10kb_07vs25_downregulated_SNPs	i35631Gh	A07	4546814	Gohir.A07G037700
10kb_07vs25_downregulated_SNPs	i57007Gb	A07	5679376	Gohir.A07G046600
10kb_07vs25_downregulated_SNPs	i28204Gh	A07	10158164	Gohir.A07G072500
10kb_07vs25_downregulated_SNPs	i36216Gh	A07	10962821	Gohir.A07G077300
10kb_07vs25_downregulated_SNPs	i43291Gh	A07	10972102	Gohir.A07G077300
10kb_07vs25_downregulated_SNPs	i36939Gh	A07	20706094	Gohir.A07G112000
10kb_07vs25_downregulated_SNPs	i43067Gh	A07	44873123	Gohir.A07G157000
10kb_07vs25_downregulated_SNPs	i41987Gh	A07	87606028	Gohir.A07G194400
10kb_07vs25_downregulated_SNPs	i64424Gm	A07	92306161	Gohir.A07G222000
10kb_07vs25_downregulated_SNPs	i59416Gb	A08	79987361	Gohir.A08G109500
10kb_07vs25_downregulated_SNPs	i22628Gh	A08	89726166	Gohir.A08G115900
10kb_07vs25_downregulated_SNPs	i26429Gh	A08	96806122	Gohir.A08G124300
10kb_07vs25_downregulated_SNPs	i44233Gh	A08	112332293	Gohir.A08G172200
10kb_07vs25_downregulated_SNPs	i04572Gh	A08	115861621	Gohir.A08G187700
10kb_07vs25_downregulated_SNPs	i04708Gh	A08	120028064	Gohir.A08G217000
10kb_07vs25_downregulated_SNPs	i39966Gh	A09	376257	Gohir.A09G001100
10kb_07vs25_downregulated_SNPs	i40181Gh	A09	5868910	Gohir.A09G019100
10kb_07vs25_downregulated_SNPs	i21353Gh	A09	61127117	Gohir.A09G090000
10kb_07vs25_downregulated_SNPs	i06258Gh	A09	71905102	Gohir.A09G146300
10kb_07vs25_downregulated_SNPs	i06260Gh	A09	71905939	Gohir.A09G146300
10kb_07vs25_downregulated_SNPs	i26283Gh	A09	73260078	Gohir.A09G160300
10kb_07vs25_downregulated_SNPs	i06405Gh	A09	75560649	Gohir.A09G181200
10kb_07vs25_downregulated_SNPs	i52753Gb	A09	75581535	Gohir.A09G181200
10kb_07vs25_downregulated_SNPs	i06448Gh	A09	76590184	Gohir.A09G191700
10kb_07vs25_downregulated_SNPs	i06449Gh	A09	76591238	Gohir.A09G191700
10kb_07vs25_downregulated_SNPs	i00880Gh	A09	76592035	Gohir.A09G191700
10kb_07vs25_downregulated_SNPs	i00459Gh	A09	77969670	Gohir.A09G205400
10kb_07vs25_downregulated_SNPs	i29123Gh	A09	78533183	Gohir.A09G212000
10kb_07vs25_downregulated_SNPs	i47965Gh	A09	80178160	Gohir.A09G230300
10kb_07vs25_downregulated_SNPs	i32110Gh	A10	709571	Gohir.A10G008400
10kb_07vs25_downregulated_SNPs	i36076Gh	A10	4338885	Gohir.A10G045200
10kb_07vs25_downregulated_SNPs	i39237Gh	A10	7844053	Gohir.A10G064400
10kb_07vs25_downregulated_SNPs	i38576Gh	A10	25568285	Gohir.A10G107900
10kb_07vs25_downregulated_SNPs	i58620Gb	A10	71733685	Gohir.A10G137500
10kb_07vs25_downregulated_SNPs	i38146Gh	A10	71733764	Gohir.A10G137500
10kb_07vs25_downregulated_SNPs	i55821Gb	A10	71734992	Gohir.A10G137500
10kb_07vs25_downregulated_SNPs	i33010Gh	A10	81532901	Gohir.A10G152300
10kb_07vs25_downregulated_SNPs	i41552Gh	A10	82875992	Gohir.A10G154700
10kb_07vs25_downregulated_SNPs	i49113Gh	A10	111469685	Gohir.A10G239200
10kb_07vs25_downregulated_SNPs	i00794Gh	A11	1115088	Gohir.A11G011400
10kb_07vs25_downregulated_SNPs	i47992Gh	A11	3328163	Gohir.A11G036600
10kb_07vs25_downregulated_SNPs	i00136Gh	A11	5916969	Gohir.A11G063800
10kb_07vs25_downregulated_SNPs	i15940Gh	A11	6467894	Gohir.A11G070400
10kb_07vs25_downregulated_SNPs	i38097Gh	A11	7234008	Gohir.A11G078100
10kb_07vs25_downregulated_SNPs	i01240Gh	A11	9560446	Gohir.A11G098600
10kb_07vs25_downregulated_SNPs	i50370Gb	A11	14239651	Gohir.A11G126200
10kb_07vs25_downregulated_SNPs	i33294Gh	A11	18435698	Gohir.A11G150400
10kb_07vs25_downregulated_SNPs	i36794Gh	A11	22403449	Gohir.A11G165100
10kb_07vs25_downregulated_SNPs	i22295Gh	A11	22416834	Gohir.A11G165100
10kb_07vs25_downregulated_SNPs	i36198Gh	A11	108126772	Gohir.A11G291000
10kb_07vs25_downregulated_SNPs	i50014Gb	A11	112887937	Gohir.A11G316800
10kb_07vs25_downregulated_SNPs	i41630Gh	A11	114226503	Gohir.A11G328900
10kb_07vs25_downregulated_SNPs	i41717Gh	A12	3252686	Gohir.A12G023100
10kb_07vs25_downregulated_SNPs	i34477Gh	A12	81189329	Gohir.A12G137200
10kb_07vs25_downregulated_SNPs	i35387Gh	A12	81191227	Gohir.A12G137200
10kb_07vs25_downregulated_SNPs	i45574Gh	A12	87079486	Gohir.A12G156600
10kb_07vs25_downregulated_SNPs	i19467Gh	A12	92969835	Gohir.A12G185700
10kb_07vs25_downregulated_SNPs	i39087Gh	A12	93076743	Gohir.A12G186700
10kb_07vs25_downregulated_SNPs	i47740Gh	A12	93083104	Gohir.A12G186800
10kb_07vs25_downregulated_SNPs	i35524Gh	A12	93131876	Gohir.A12G187100
10kb_07vs25_downregulated_SNPs	i08295Gh	A12	95776221	Gohir.A12G204700
10kb_07vs25_downregulated_SNPs	i40044Gh	A12	96894757	Gohir.A12G213300
10kb_07vs25_downregulated_SNPs	i00404Gh	A12	98303905	Gohir.A12G227900
10kb_07vs25_downregulated_SNPs	i33030Gh	A13	28212	Gohir.A13G000100
10kb_07vs25_downregulated_SNPs	i33031Gh	A13	164092	Gohir.A13G001400
10kb_07vs25_downregulated_SNPs	i52456Gb	A13	2649003	Gohir.A13G020400
10kb_07vs25_downregulated_SNPs	i40299Gh	A13	3815329	Gohir.A13G031100
10kb_07vs25_downregulated_SNPs	i22760Gh	A13	4206833	Gohir.A13G033800
10kb_07vs25_downregulated_SNPs	i35443Gh	A13	4210203	Gohir.A13G033900
10kb_07vs25_downregulated_SNPs	i00218Gh	A13	5155108	Gohir.A13G039700
10kb_07vs25_downregulated_SNPs	i35461Gh	A13	61184444	Gohir.A13G100800
10kb_07vs25_downregulated_SNPs	i46668Gh	A13	71805043	Gohir.A13G111900
10kb_07vs25_downregulated_SNPs	i40849Gh	A13	87031321	Gohir.A13G135700
10kb_07vs25_downregulated_SNPs	i23228Gh	A13	94960462	Gohir.A13G162200
10kb_07vs25_downregulated_SNPs	i41672Gh	A13	96247489	Gohir.A13G166500
10kb_07vs25_downregulated_SNPs	i63080Gt	A13	99766572	Gohir.A13G190600
10kb_07vs25_downregulated_SNPs	i28378Gh	A13	100378571	Gohir.A13G197000
10kb_07vs25_downregulated_SNPs	i52256Gb	A13	100379251	Gohir.A13G197000
10kb_07vs25_downregulated_SNPs	i00720Gh	A13	100379335	Gohir.A13G197000
10kb_07vs25_downregulated_SNPs	i37798Gh	A13	100394613	Gohir.A13G197000
10kb_07vs25_downregulated_SNPs	i35441Gh	A13	102754843	Gohir.A13G215500
10kb_07vs25_downregulated_SNPs	i31821Gh	A13	103357901	Gohir.A13G221300
10kb_07vs25_downregulated_SNPs	i13659Gh	A13	103610140	Gohir.A13G223900
10kb_07vs25_downregulated_SNPs	i51136Gb	A13	104468486	Gohir.A13G235200
10kb_07vs25_downregulated_SNPs	i27553Gh	D01	931953	Gohir.D01G011300
10kb_07vs25_downregulated_SNPs	i02320Gh	D01	2643576	Gohir.D01G027200
10kb_07vs25_downregulated_SNPs	i13968Gh	D01	3322482	Gohir.D01G033500
10kb_07vs25_downregulated_SNPs	i00470Gh	D01	4584636	Gohir.D01G040400
10kb_07vs25_downregulated_SNPs	i02349Gh	D01	4585957	Gohir.D01G040400
10kb_07vs25_downregulated_SNPs	i02367Gh	D01	5241841	Gohir.D01G044700
10kb_07vs25_downregulated_SNPs	i14596Gh	D01	5243614	Gohir.D01G044700
10kb_07vs25_downregulated_SNPs	i41032Gh	D01	7515437	Gohir.D01G057600
10kb_07vs25_downregulated_SNPs	i26925Gh	D01	9060003	Gohir.D01G062700
10kb_07vs25_downregulated_SNPs	i02444Gh	D01	9363579	Gohir.D01G064800
10kb_07vs25_downregulated_SNPs	i02445Gh	D01	9364616	Gohir.D01G064800
10kb_07vs25_downregulated_SNPs	i02457Gh	D01	9971949	Gohir.D01G068500
10kb_07vs25_downregulated_SNPs	i14626Gh	D01	9972769	Gohir.D01G068500
10kb_07vs25_downregulated_SNPs	i02459Gh	D01	9974515	Gohir.D01G068500
10kb_07vs25_downregulated_SNPs	i02460Gh	D01	9977691	Gohir.D01G068500
10kb_07vs25_downregulated_SNPs	i00224Gh	D01	10344295	Gohir.D01G070300
10kb_07vs25_downregulated_SNPs	i02519Gh	D01	12243779	Gohir.D01G080000
10kb_07vs25_downregulated_SNPs	i02538Gh	D01	15150243	Gohir.D01G088500
10kb_07vs25_downregulated_SNPs	i02579Gh	D01	19349722	Gohir.D01G103800
10kb_07vs25_downregulated_SNPs	i02580Gh	D01	19351749	Gohir.D01G103800
10kb_07vs25_downregulated_SNPs	i14665Gh	D01	19352753	Gohir.D01G103800
10kb_07vs25_downregulated_SNPs	i02581Gh	D01	19353846	Gohir.D01G103800
10kb_07vs25_downregulated_SNPs	i14667Gh	D01	19354068	Gohir.D01G103800
10kb_07vs25_downregulated_SNPs	i14668Gh	D01	19354130	Gohir.D01G103800
10kb_07vs25_downregulated_SNPs	i34978Gh	D01	19822191	Gohir.D01G105200
10kb_07vs25_downregulated_SNPs	i02646Gh	D01	35563058	Gohir.D01G130000
10kb_07vs25_downregulated_SNPs	i28457Gh	D01	35579690	Gohir.D01G130000
10kb_07vs25_downregulated_SNPs	i45904Gh	D01	38926788	Gohir.D01G132700
10kb_07vs25_downregulated_SNPs	i40570Gh	D01	38932804	Gohir.D01G132700
10kb_07vs25_downregulated_SNPs	i14710Gh	D01	50273221	Gohir.D01G150000
10kb_07vs25_downregulated_SNPs	i41852Gh	D01	55876042	Gohir.D01G164400
10kb_07vs25_downregulated_SNPs	i02797Gh	D01	55914399	Gohir.D01G164500
10kb_07vs25_downregulated_SNPs	i14729Gh	D01	57286120	Gohir.D01G171600
10kb_07vs25_downregulated_SNPs	i14730Gh	D01	57286188	Gohir.D01G171600
10kb_07vs25_downregulated_SNPs	i36576Gh	D01	57308039	Gohir.D01G171600
10kb_07vs25_downregulated_SNPs	i38003Gh	D01	57483067	Gohir.D01G172700
10kb_07vs25_downregulated_SNPs	i02866Gh	D01	57556294	Gohir.D01G173300
10kb_07vs25_downregulated_SNPs	i23263Gh	D01	61175014	Gohir.D01G192700
10kb_07vs25_downregulated_SNPs	i03003Gh	D01	62150168	Gohir.D01G198000
10kb_07vs25_downregulated_SNPs	i13987Gh	D01	62246726	Gohir.D01G199200
10kb_07vs25_downregulated_SNPs	i04821Gh	D02	140582	Gohir.D02G001800
10kb_07vs25_downregulated_SNPs	i15266Gh	D02	142389	Gohir.D02G001800
10kb_07vs25_downregulated_SNPs	i15267Gh	D02	142446	Gohir.D02G001800
10kb_07vs25_downregulated_SNPs	i04827Gh	D02	156556	Gohir.D02G001800
10kb_07vs25_downregulated_SNPs	i15268Gh	D02	156868	Gohir.D02G001800
10kb_07vs25_downregulated_SNPs	i15270Gh	D02	157510	Gohir.D02G001800
10kb_07vs25_downregulated_SNPs	i04834Gh	D02	379206	Gohir.D02G005300
10kb_07vs25_downregulated_SNPs	i18837Gh	D02	423008	Gohir.D02G005700
10kb_07vs25_downregulated_SNPs	i21826Gh	D02	2199639	Gohir.D02G017500
10kb_07vs25_downregulated_SNPs	i47804Gh	D02	2324654	Gohir.D02G018100
10kb_07vs25_downregulated_SNPs	i36851Gh	D02	2341451	Gohir.D02G018200
10kb_07vs25_downregulated_SNPs	i05032Gh	D02	4697533	Gohir.D02G036700
10kb_07vs25_downregulated_SNPs	i30023Gh	D02	28995654	Gohir.D02G107000
10kb_07vs25_downregulated_SNPs	i18942Gh	D02	46729035	Gohir.D02G134200
10kb_07vs25_downregulated_SNPs	i45229Gh	D02	55785164	Gohir.D02G150000
10kb_07vs25_downregulated_SNPs	i35119Gh	D02	57921037	Gohir.D02G156600
10kb_07vs25_downregulated_SNPs	i23348Gh	D02	61296742	Gohir.D02G167500
10kb_07vs25_downregulated_SNPs	i05464Gh	D02	61313554	Gohir.D02G167500
10kb_07vs25_downregulated_SNPs	i50379Gb	D02	61313554	Gohir.D02G167500
10kb_07vs25_downregulated_SNPs	i05524Gh	D02	63249859	Gohir.D02G174900
10kb_07vs25_downregulated_SNPs	i33709Gh	D02	63257191	Gohir.D02G174900
10kb_07vs25_downregulated_SNPs	i05526Gh	D02	63259605	Gohir.D02G174900
10kb_07vs25_downregulated_SNPs	i05588Gh	D02	65174311	Gohir.D02G185400
10kb_07vs25_downregulated_SNPs	i05619Gh	D02	66546166	Gohir.D02G193800
10kb_07vs25_downregulated_SNPs	i05620Gh	D02	66548750	Gohir.D02G193800
10kb_07vs25_downregulated_SNPs	i15563Gh	D02	67204830	Gohir.D02G199300
10kb_07vs25_downregulated_SNPs	i05642Gh	D02	67205011	Gohir.D02G199300
10kb_07vs25_downregulated_SNPs	i05700Gh	D02	68234295	Gohir.D02G208300
10kb_07vs25_downregulated_SNPs	i05733Gh	D02	68965156	Gohir.D02G215800
10kb_07vs25_downregulated_SNPs	i05734Gh	D02	69033868	Gohir.D02G216900
10kb_07vs25_downregulated_SNPs	i15585Gh	D02	69039672	Gohir.D02G216900
10kb_07vs25_downregulated_SNPs	i15617Gh	D02	69596893	Gohir.D02G223900
10kb_07vs25_downregulated_SNPs	i15618Gh	D02	69598521	Gohir.D02G223900
10kb_07vs25_downregulated_SNPs	i05769Gh	D02	69598895	Gohir.D02G223900
10kb_07vs25_downregulated_SNPs	i65685Gm	D02	69660920	Gohir.D02G225200
10kb_07vs25_downregulated_SNPs	i03069Gh	D03	139134	Gohir.D03G001600
10kb_07vs25_downregulated_SNPs	i38774Gh	D03	397129	Gohir.D03G005500
10kb_07vs25_downregulated_SNPs	i03096Gh	D03	545263	Gohir.D03G007600
10kb_07vs25_downregulated_SNPs	i03098Gh	D03	561175	Gohir.D03G007600
10kb_07vs25_downregulated_SNPs	i03181Gh	D03	2290681	Gohir.D03G023200
10kb_07vs25_downregulated_SNPs	i18519Gh	D03	2585110	Gohir.D03G025600
10kb_07vs25_downregulated_SNPs	i03187Gh	D03	2629122	Gohir.D03G026000
10kb_07vs25_downregulated_SNPs	i47812Gh	D03	2640913	Gohir.D03G026000
10kb_07vs25_downregulated_SNPs	i01044Gh	D03	3277801	Gohir.D03G030300
10kb_07vs25_downregulated_SNPs	i14832Gh	D03	3428687	Gohir.D03G030900
10kb_07vs25_downregulated_SNPs	i24128Gh	D03	13904596	Gohir.D03G060700
10kb_07vs25_downregulated_SNPs	i03401Gh	D03	42249247	Gohir.D03G113800
10kb_07vs25_downregulated_SNPs	i03442Gh	D03	44809511	Gohir.D03G124400
10kb_07vs25_downregulated_SNPs	i00705Gh	D03	44824617	Gohir.D03G124600
10kb_07vs25_downregulated_SNPs	i18569Gh	D03	44824769	Gohir.D03G124600
10kb_07vs25_downregulated_SNPs	i22912Gh	D03	48376064	Gohir.D03G142600
10kb_07vs25_downregulated_SNPs	i03523Gh	D03	48392229	Gohir.D03G142600
10kb_07vs25_downregulated_SNPs	i43459Gh	D03	51414563	Gohir.D03G163900
10kb_07vs25_downregulated_SNPs	i03653Gh	D03	51700015	Gohir.D03G164500
10kb_07vs25_downregulated_SNPs	i14963Gh	D03	52044458	Gohir.D03G167500
10kb_07vs25_downregulated_SNPs	i12418Gh	D04	1662147	Gohir.D04G012300
10kb_07vs25_downregulated_SNPs	i12419Gh	D04	1662744	Gohir.D04G012300
10kb_07vs25_downregulated_SNPs	i38556Gh	D04	2751570	Gohir.D04G018600
10kb_07vs25_downregulated_SNPs	i47846Gh	D04	7967607	Gohir.D04G049200
10kb_07vs25_downregulated_SNPs	i12588Gh	D04	8080864	Gohir.D04G049900
10kb_07vs25_downregulated_SNPs	i12608Gh	D04	9648647	Gohir.D04G055100
10kb_07vs25_downregulated_SNPs	i34437Gh	D04	42336821	Gohir.D04G119300
10kb_07vs25_downregulated_SNPs	i12740Gh	D04	47681648	Gohir.D04G134600
10kb_07vs25_downregulated_SNPs	i12810Gh	D04	51929811	Gohir.D04G152400
10kb_07vs25_downregulated_SNPs	i44683Gh	D04	51982613	Gohir.D04G153200
10kb_07vs25_downregulated_SNPs	i12818Gh	D04	52039215	Gohir.D04G153600
10kb_07vs25_downregulated_SNPs	i12824Gh	D04	52240178	Gohir.D04G155400
10kb_07vs25_downregulated_SNPs	i20228Gh	D04	55036628	Gohir.D04G178100
10kb_07vs25_downregulated_SNPs	i08803Gh	D05	887172	Gohir.D05G009000
10kb_07vs25_downregulated_SNPs	i08823Gh	D05	1637753	Gohir.D05G017300
10kb_07vs25_downregulated_SNPs	i08863Gh	D05	2415652	Gohir.D05G027000
10kb_07vs25_downregulated_SNPs	i08865Gh	D05	2462390	Gohir.D05G027600
10kb_07vs25_downregulated_SNPs	i19532Gh	D05	2749582	Gohir.D05G031300
10kb_07vs25_downregulated_SNPs	i08878Gh	D05	2752169	Gohir.D05G031300
10kb_07vs25_downregulated_SNPs	i08879Gh	D05	2764509	Gohir.D05G031300
10kb_07vs25_downregulated_SNPs	i16538Gh	D05	2769104	Gohir.D05G031300
10kb_07vs25_downregulated_SNPs	i08882Gh	D05	2769667	Gohir.D05G031300
10kb_07vs25_downregulated_SNPs	i08891Gh	D05	2884446	Gohir.D05G033100
10kb_07vs25_downregulated_SNPs	i08892Gh	D05	2886613	Gohir.D05G033100
10kb_07vs25_downregulated_SNPs	i08895Gh	D05	2896178	Gohir.D05G033100
10kb_07vs25_downregulated_SNPs	i16566Gh	D05	4060894	Gohir.D05G048700
10kb_07vs25_downregulated_SNPs	i08982Gh	D05	4443144	Gohir.D05G052600
10kb_07vs25_downregulated_SNPs	i09046Gh	D05	5117712	Gohir.D05G061400
10kb_07vs25_downregulated_SNPs	i09055Gh	D05	5249341	Gohir.D05G063400
10kb_07vs25_downregulated_SNPs	i34897Gh	D05	5267538	Gohir.D05G063500
10kb_07vs25_downregulated_SNPs	i16592Gh	D05	5319520	Gohir.D05G064000
10kb_07vs25_downregulated_SNPs	i16605Gh	D05	6075312	Gohir.D05G072600
10kb_07vs25_downregulated_SNPs	i09145Gh	D05	6963101	Gohir.D05G082600
10kb_07vs25_downregulated_SNPs	i09147Gh	D05	6975281	Gohir.D05G082600
10kb_07vs25_downregulated_SNPs	i09307Gh	D05	10886461	Gohir.D05G124600
10kb_07vs25_downregulated_SNPs	i39020Gh	D05	10890238	Gohir.D05G124600
10kb_07vs25_downregulated_SNPs	i09363Gh	D05	12307652	Gohir.D05G139600
10kb_07vs25_downregulated_SNPs	i16690Gh	D05	13378567	Gohir.D05G150400
10kb_07vs25_downregulated_SNPs	i09491Gh	D05	14675413	Gohir.D05G163000
10kb_07vs25_downregulated_SNPs	i09501Gh	D05	15121361	Gohir.D05G167700
10kb_07vs25_downregulated_SNPs	i39249Gh	D05	15159850	Gohir.D05G168300
10kb_07vs25_downregulated_SNPs	i14159Gh	D05	15764123	Gohir.D05G176300
10kb_07vs25_downregulated_SNPs	i14160Gh	D05	15768983	Gohir.D05G176300
10kb_07vs25_downregulated_SNPs	i09536Gh	D05	16252551	Gohir.D05G181300
10kb_07vs25_downregulated_SNPs	i09538Gh	D05	16275745	Gohir.D05G181300
10kb_07vs25_downregulated_SNPs	i09549Gh	D05	17060848	Gohir.D05G189700
10kb_07vs25_downregulated_SNPs	i09580Gh	D05	17416675	Gohir.D05G192900
10kb_07vs25_downregulated_SNPs	i46042Gh	D05	18150455	Gohir.D05G201500
10kb_07vs25_downregulated_SNPs	i38854Gh	D05	19230218	Gohir.D05G212900
10kb_07vs25_downregulated_SNPs	i09626Gh	D05	19305440	Gohir.D05G213400
10kb_07vs25_downregulated_SNPs	i19574Gh	D05	19308058	Gohir.D05G213400
10kb_07vs25_downregulated_SNPs	i40266Gh	D05	19678761	Gohir.D05G217000
10kb_07vs25_downregulated_SNPs	i00599Gh	D05	19969757	Gohir.D05G219300
10kb_07vs25_downregulated_SNPs	i09672Gh	D05	19980577	Gohir.D05G219300
10kb_07vs25_downregulated_SNPs	i46600Gh	D05	21037637	Gohir.D05G227800
10kb_07vs25_downregulated_SNPs	i00312Gh	D05	25756727	Gohir.D05G262300
10kb_07vs25_downregulated_SNPs	i09853Gh	D05	25821910	Gohir.D05G262900
10kb_07vs25_downregulated_SNPs	i32821Gh	D05	25822349	Gohir.D05G262900
10kb_07vs25_downregulated_SNPs	i60860Gt	D05	26003154	Gohir.D05G265000
10kb_07vs25_downregulated_SNPs	i09859Gh	D05	26003266	Gohir.D05G265000
10kb_07vs25_downregulated_SNPs	i09865Gh	D05	26071608	Gohir.D05G265600
10kb_07vs25_downregulated_SNPs	i09866Gh	D05	26071729	Gohir.D05G265600
10kb_07vs25_downregulated_SNPs	i09867Gh	D05	26072287	Gohir.D05G265600
10kb_07vs25_downregulated_SNPs	i09926Gh	D05	27500877	Gohir.D05G274400
10kb_07vs25_downregulated_SNPs	i09927Gh	D05	27501479	Gohir.D05G274400
10kb_07vs25_downregulated_SNPs	i43359Gh	D05	27501825	Gohir.D05G274400
10kb_07vs25_downregulated_SNPs	i10019Gh	D05	30755214	Gohir.D05G291100
10kb_07vs25_downregulated_SNPs	i16817Gh	D05	30768859	Gohir.D05G291100
10kb_07vs25_downregulated_SNPs	i00141Gh	D05	30768904	Gohir.D05G291100
10kb_07vs25_downregulated_SNPs	i31837Gh	D05	31906660	Gohir.D05G293700
10kb_07vs25_downregulated_SNPs	i10065Gh	D05	32657531	Gohir.D05G297000
10kb_07vs25_downregulated_SNPs	i10066Gh	D05	32672941	Gohir.D05G297000
10kb_07vs25_downregulated_SNPs	i20947Gh	D05	32779783	Gohir.D05G297800
10kb_07vs25_downregulated_SNPs	i10307Gh	D05	55275038	Gohir.D05G343300
10kb_07vs25_downregulated_SNPs	i22732Gh	D05	57276633	Gohir.D05G351700
10kb_07vs25_downregulated_SNPs	i19721Gh	D06	155831	Gohir.D06G002100
10kb_07vs25_downregulated_SNPs	i10540Gh	D06	491959	Gohir.D06G004300
10kb_07vs25_downregulated_SNPs	i10541Gh	D06	493561	Gohir.D06G004300
10kb_07vs25_downregulated_SNPs	i00683Gh	D06	1130419	Gohir.D06G011300
10kb_07vs25_downregulated_SNPs	i10585Gh	D06	1138160	Gohir.D06G011300
10kb_07vs25_downregulated_SNPs	i10651Gh	D06	2000207	Gohir.D06G019200
10kb_07vs25_downregulated_SNPs	i17136Gh	D06	2002685	Gohir.D06G019200
10kb_07vs25_downregulated_SNPs	i10669Gh	D06	2197470	Gohir.D06G020400
10kb_07vs25_downregulated_SNPs	i10671Gh	D06	2198853	Gohir.D06G020400
10kb_07vs25_downregulated_SNPs	i10676Gh	D06	2256931	Gohir.D06G020900
10kb_07vs25_downregulated_SNPs	i10683Gh	D06	2371566	Gohir.D06G021500
10kb_07vs25_downregulated_SNPs	i17147Gh	D06	2373891	Gohir.D06G021500
10kb_07vs25_downregulated_SNPs	i10718Gh	D06	2733489	Gohir.D06G024900
10kb_07vs25_downregulated_SNPs	i10719Gh	D06	2733735	Gohir.D06G024900
10kb_07vs25_downregulated_SNPs	i10775Gh	D06	4172298	Gohir.D06G034500
10kb_07vs25_downregulated_SNPs	i10777Gh	D06	4313514	Gohir.D06G035700
10kb_07vs25_downregulated_SNPs	i10778Gh	D06	4313757	Gohir.D06G035700
10kb_07vs25_downregulated_SNPs	i38604Gh	D06	5344264	Gohir.D06G039200
10kb_07vs25_downregulated_SNPs	i32916Gh	D06	5344970	Gohir.D06G039200
10kb_07vs25_downregulated_SNPs	i10828Gh	D06	6439644	Gohir.D06G044000
10kb_07vs25_downregulated_SNPs	i10948Gh	D06	13785612	Gohir.D06G072300
10kb_07vs25_downregulated_SNPs	i11253Gh	D06	59704582	Gohir.D06G161600
10kb_07vs25_downregulated_SNPs	i37080Gh	D06	63745406	Gohir.D06G182200
10kb_07vs25_downregulated_SNPs	i11374Gh	D06	65021577	Gohir.D06G188900
10kb_07vs25_downregulated_SNPs	i17394Gh	D06	66050655	Gohir.D06G195300
10kb_07vs25_downregulated_SNPs	i11465Gh	D06	66053168	Gohir.D06G195300
10kb_07vs25_downregulated_SNPs	i00928Gh	D07	1102075	Gohir.D07G009600
10kb_07vs25_downregulated_SNPs	i18200Gh	D07	1918221	Gohir.D07G017600
10kb_07vs25_downregulated_SNPs	i01337Gh	D07	1946459	Gohir.D07G017900
10kb_07vs25_downregulated_SNPs	i01338Gh	D07	1951393	Gohir.D07G017900
10kb_07vs25_downregulated_SNPs	i01339Gh	D07	1951569	Gohir.D07G017900
10kb_07vs25_downregulated_SNPs	i01340Gh	D07	1953008	Gohir.D07G017900
10kb_07vs25_downregulated_SNPs	i01349Gh	D07	2197098	Gohir.D07G020100
10kb_07vs25_downregulated_SNPs	i01488Gh	D07	6384406	Gohir.D07G056100
10kb_07vs25_downregulated_SNPs	i18215Gh	D07	6395628	Gohir.D07G056100
10kb_07vs25_downregulated_SNPs	i01582Gh	D07	9333282	Gohir.D07G077900
10kb_07vs25_downregulated_SNPs	i01583Gh	D07	9337014	Gohir.D07G077900
10kb_07vs25_downregulated_SNPs	i01584Gh	D07	9337912	Gohir.D07G077900
10kb_07vs25_downregulated_SNPs	i01587Gh	D07	9338757	Gohir.D07G077900
10kb_07vs25_downregulated_SNPs	i01651Gh	D07	12092735	Gohir.D07G095200
10kb_07vs25_downregulated_SNPs	i43873Gh	D07	12094229	Gohir.D07G095200
10kb_07vs25_downregulated_SNPs	i23014Gh	D07	15365648	Gohir.D07G110800
10kb_07vs25_downregulated_SNPs	i26191Gh	D07	15367749	Gohir.D07G110800
10kb_07vs25_downregulated_SNPs	i14390Gh	D07	18886462	Gohir.D07G125100
10kb_07vs25_downregulated_SNPs	i47603Gh	D07	19524266	Gohir.D07G127700
10kb_07vs25_downregulated_SNPs	i01795Gh	D07	20579163	Gohir.D07G131100
10kb_07vs25_downregulated_SNPs	i01828Gh	D07	23191929	Gohir.D07G143000
10kb_07vs25_downregulated_SNPs	i27605Gh	D07	25808624	Gohir.D07G150900
10kb_07vs25_downregulated_SNPs	i01916Gh	D07	29880130	Gohir.D07G160700
10kb_07vs25_downregulated_SNPs	i25985Gh	D07	32512152	Gohir.D07G166500
10kb_07vs25_downregulated_SNPs	i31772Gh	D07	32517882	Gohir.D07G166500
10kb_07vs25_downregulated_SNPs	i40186Gh	D07	32779983	Gohir.D07G167300
10kb_07vs25_downregulated_SNPs	i45068Gh	D07	45022708	Gohir.D07G183500
10kb_07vs25_downregulated_SNPs	i28651Gh	D07	52850398	Gohir.D07G206000
10kb_07vs25_downregulated_SNPs	i28549Gh	D07	52860162	Gohir.D07G206000
10kb_07vs25_downregulated_SNPs	i27262Gh	D07	52860628	Gohir.D07G206000
10kb_07vs25_downregulated_SNPs	i36669Gh	D07	53520285	Gohir.D07G210000
10kb_07vs25_downregulated_SNPs	i41603Gh	D07	56931236	Gohir.D07G231400
10kb_07vs25_downregulated_SNPs	i03735Gh	D08	756479	Gohir.D08G009700
10kb_07vs25_downregulated_SNPs	i03736Gh	D08	761195	Gohir.D08G009700
10kb_07vs25_downregulated_SNPs	i03748Gh	D08	817272	Gohir.D08G010800
10kb_07vs25_downregulated_SNPs	i03794Gh	D08	1594734	Gohir.D08G018600
10kb_07vs25_downregulated_SNPs	i03806Gh	D08	1888934	Gohir.D08G021300
10kb_07vs25_downregulated_SNPs	i03807Gh	D08	1889231	Gohir.D08G021300
10kb_07vs25_downregulated_SNPs	i03819Gh	D08	2258627	Gohir.D08G025000
10kb_07vs25_downregulated_SNPs	i03820Gh	D08	2264592	Gohir.D08G025000
10kb_07vs25_downregulated_SNPs	i03874Gh	D08	3192679	Gohir.D08G032800
10kb_07vs25_downregulated_SNPs	i03910Gh	D08	4269346	Gohir.D08G041600
10kb_07vs25_downregulated_SNPs	i03990Gh	D08	6407375	Gohir.D08G056900
10kb_07vs25_downregulated_SNPs	i03992Gh	D08	6413113	Gohir.D08G056900
10kb_07vs25_downregulated_SNPs	i15040Gh	D08	6413352	Gohir.D08G056900
10kb_07vs25_downregulated_SNPs	i03993Gh	D08	6413924	Gohir.D08G056900
10kb_07vs25_downregulated_SNPs	i47680Gh	D08	7179919	Gohir.D08G061900
10kb_07vs25_downregulated_SNPs	i04045Gh	D08	9462067	Gohir.D08G071000
10kb_07vs25_downregulated_SNPs	i04046Gh	D08	9462271	Gohir.D08G071000
10kb_07vs25_downregulated_SNPs	i39937Gh	D08	32452289	Gohir.D08G110100
10kb_07vs25_downregulated_SNPs	i41740Gh	D08	46911870	Gohir.D08G139800
10kb_07vs25_downregulated_SNPs	i49047Gh	D08	50452592	Gohir.D08G149100
10kb_07vs25_downregulated_SNPs	i42551Gh	D08	50457556	Gohir.D08G149100
10kb_07vs25_downregulated_SNPs	i37271Gh	D08	60583133	Gohir.D08G197000
10kb_07vs25_downregulated_SNPs	i15159Gh	D08	60598967	Gohir.D08G197000
10kb_07vs25_downregulated_SNPs	i15160Gh	D08	60599018	Gohir.D08G197000
10kb_07vs25_downregulated_SNPs	i04505Gh	D08	60812542	Gohir.D08G197600
10kb_07vs25_downregulated_SNPs	i04506Gh	D08	60812906	Gohir.D08G197600
10kb_07vs25_downregulated_SNPs	i15168Gh	D08	60813318	Gohir.D08G197600
10kb_07vs25_downregulated_SNPs	i15169Gh	D08	60813442	Gohir.D08G197600
10kb_07vs25_downregulated_SNPs	i40107Gh	D08	62935421	Gohir.D08G212100
10kb_07vs25_downregulated_SNPs	i00947Gh	D08	63209385	Gohir.D08G213900
10kb_07vs25_downregulated_SNPs	i15214Gh	D08	64164137	Gohir.D08G219700
10kb_07vs25_downregulated_SNPs	i04633Gh	D08	64172789	Gohir.D08G219700
10kb_07vs25_downregulated_SNPs	i15216Gh	D08	64179876	Gohir.D08G219700
10kb_07vs25_downregulated_SNPs	i15218Gh	D08	64338238	Gohir.D08G221000
10kb_07vs25_downregulated_SNPs	i48423Gh	D08	64481004	Gohir.D08G222000
10kb_07vs25_downregulated_SNPs	i04689Gh	D08	65936827	Gohir.D08G235000
10kb_07vs25_downregulated_SNPs	i04718Gh	D08	66371744	Gohir.D08G237700
10kb_07vs25_downregulated_SNPs	i04798Gh	D08	68273941	Gohir.D08G254400
10kb_07vs25_downregulated_SNPs	i41037Gh	D09	3250076	Gohir.D09G013200
10kb_07vs25_downregulated_SNPs	i47516Gh	D09	3251123	Gohir.D09G013200
10kb_07vs25_downregulated_SNPs	i48125Gh	D09	36257594	Gohir.D09G093900
10kb_07vs25_downregulated_SNPs	i06087Gh	D09	36602801	Gohir.D09G095600
10kb_07vs25_downregulated_SNPs	i06088Gh	D09	36618606	Gohir.D09G095600
10kb_07vs25_downregulated_SNPs	i06089Gh	D09	36619704	Gohir.D09G095600
10kb_07vs25_downregulated_SNPs	i46598Gh	D09	36865795	Gohir.D09G097900
10kb_07vs25_downregulated_SNPs	i15716Gh	D09	38422975	Gohir.D09G107300
10kb_07vs25_downregulated_SNPs	i22486Gh	D09	38425143	Gohir.D09G107300
10kb_07vs25_downregulated_SNPs	i43867Gh	D09	38538666	Gohir.D09G108100
10kb_07vs25_downregulated_SNPs	i06203Gh	D09	41763649	Gohir.D09G129700
10kb_07vs25_downregulated_SNPs	i27543Gh	D09	42061396	Gohir.D09G132000
10kb_07vs25_downregulated_SNPs	i06236Gh	D09	43357654	Gohir.D09G141500
10kb_07vs25_downregulated_SNPs	i15762Gh	D09	43358161	Gohir.D09G141500
10kb_07vs25_downregulated_SNPs	i06238Gh	D09	43361911	Gohir.D09G141500
10kb_07vs25_downregulated_SNPs	i06248Gh	D09	43601835	Gohir.D09G142400
10kb_07vs25_downregulated_SNPs	i49714Gh	D09	43606996	Gohir.D09G142400
10kb_07vs25_downregulated_SNPs	i61565Gt	D09	43606996	Gohir.D09G142400
10kb_07vs25_downregulated_SNPs	i06251Gh	D09	43612550	Gohir.D09G142400
10kb_07vs25_downregulated_SNPs	i06323Gh	D09	44474779	Gohir.D09G151100
10kb_07vs25_downregulated_SNPs	i06326Gh	D09	44487215	Gohir.D09G151100
10kb_07vs25_downregulated_SNPs	i39495Gh	D09	45146704	Gohir.D09G158100
10kb_07vs25_downregulated_SNPs	i00209Gh	D09	45156115	Gohir.D09G158100
10kb_07vs25_downregulated_SNPs	i06346Gh	D09	45156497	Gohir.D09G158100
10kb_07vs25_downregulated_SNPs	i06452Gh	D09	48147114	Gohir.D09G187500
10kb_07vs25_downregulated_SNPs	i06456Gh	D09	48226814	Gohir.D09G188700
10kb_07vs25_downregulated_SNPs	i06462Gh	D09	48397872	Gohir.D09G190900
10kb_07vs25_downregulated_SNPs	i06463Gh	D09	48399112	Gohir.D09G190900
10kb_07vs25_downregulated_SNPs	i19243Gh	D09	49081511	Gohir.D09G197900
10kb_07vs25_downregulated_SNPs	i06497Gh	D09	49105305	Gohir.D09G198400
10kb_07vs25_downregulated_SNPs	i24651Gh	D09	49235071	Gohir.D09G199500
10kb_07vs25_downregulated_SNPs	i06507Gh	D09	49320807	Gohir.D09G200900
10kb_07vs25_downregulated_SNPs	i06551Gh	D09	50413963	Gohir.D09G213500
10kb_07vs25_downregulated_SNPs	i06610Gh	D09	51776607	Gohir.D09G228400
10kb_07vs25_downregulated_SNPs	i28166Gh	D09	51779886	Gohir.D09G228400
10kb_07vs25_downregulated_SNPs	i06612Gh	D09	51784597	Gohir.D09G228400
10kb_07vs25_downregulated_SNPs	i06621Gh	D09	51962952	Gohir.D09G230700
10kb_07vs25_downregulated_SNPs	i06622Gh	D09	51966320	Gohir.D09G230700
10kb_07vs25_downregulated_SNPs	i06632Gh	D09	52229839	Gohir.D09G234300
10kb_07vs25_downregulated_SNPs	i45038Gh	D10	718447	Gohir.D10G008200
10kb_07vs25_downregulated_SNPs	i11501Gh	D10	1114987	Gohir.D10G012800
10kb_07vs25_downregulated_SNPs	i11506Gh	D10	1179482	Gohir.D10G014000
10kb_07vs25_downregulated_SNPs	i11507Gh	D10	1181934	Gohir.D10G014000
10kb_07vs25_downregulated_SNPs	i11508Gh	D10	1184090	Gohir.D10G014000
10kb_07vs25_downregulated_SNPs	i17417Gh	D10	1787488	Gohir.D10G020800
10kb_07vs25_downregulated_SNPs	i11590Gh	D10	3005542	Gohir.D10G034100
10kb_07vs25_downregulated_SNPs	i39228Gh	D10	3207196	Gohir.D10G036700
10kb_07vs25_downregulated_SNPs	i11595Gh	D10	3220375	Gohir.D10G036700
10kb_07vs25_downregulated_SNPs	i34769Gh	D10	3239665	Gohir.D10G037100
10kb_07vs25_downregulated_SNPs	i11618Gh	D10	3513252	Gohir.D10G040300
10kb_07vs25_downregulated_SNPs	i11619Gh	D10	3527294	Gohir.D10G040500
10kb_07vs25_downregulated_SNPs	i11620Gh	D10	3539235	Gohir.D10G040500
10kb_07vs25_downregulated_SNPs	i11621Gh	D10	3541275	Gohir.D10G040500
10kb_07vs25_downregulated_SNPs	i11647Gh	D10	4573446	Gohir.D10G049500
10kb_07vs25_downregulated_SNPs	i45072Gh	D10	4879341	Gohir.D10G052400
10kb_07vs25_downregulated_SNPs	i11665Gh	D10	4884079	Gohir.D10G052400
10kb_07vs25_downregulated_SNPs	i11666Gh	D10	4884234	Gohir.D10G052400
10kb_07vs25_downregulated_SNPs	i11690Gh	D10	5490820	Gohir.D10G057300
10kb_07vs25_downregulated_SNPs	i40193Gh	D10	5810992	Gohir.D10G059500
10kb_07vs25_downregulated_SNPs	i37240Gh	D10	5975044	Gohir.D10G060700
10kb_07vs25_downregulated_SNPs	i11706Gh	D10	5990851	Gohir.D10G060700
10kb_07vs25_downregulated_SNPs	i11708Gh	D10	6074477	Gohir.D10G061400
10kb_07vs25_downregulated_SNPs	i52607Gb	D10	6074804	Gohir.D10G061400
10kb_07vs25_downregulated_SNPs	i24666Gh	D10	6713326	Gohir.D10G065500
10kb_07vs25_downregulated_SNPs	i43419Gh	D10	6817963	Gohir.D10G066000
10kb_07vs25_downregulated_SNPs	i33000Gh	D10	7296902	Gohir.D10G067900
10kb_07vs25_downregulated_SNPs	i31968Gh	D10	7301166	Gohir.D10G067900
10kb_07vs25_downregulated_SNPs	i11737Gh	D10	7301311	Gohir.D10G067900
10kb_07vs25_downregulated_SNPs	i11738Gh	D10	7301583	Gohir.D10G067900
10kb_07vs25_downregulated_SNPs	i22885Gh	D10	8946449	Gohir.D10G075500
10kb_07vs25_downregulated_SNPs	i11773Gh	D10	9184844	Gohir.D10G076500
10kb_07vs25_downregulated_SNPs	i17467Gh	D10	9185645	Gohir.D10G076500
10kb_07vs25_downregulated_SNPs	i11775Gh	D10	9185816	Gohir.D10G076500
10kb_07vs25_downregulated_SNPs	i11804Gh	D10	10740623	Gohir.D10G083200
10kb_07vs25_downregulated_SNPs	i11805Gh	D10	10745647	Gohir.D10G083200
10kb_07vs25_downregulated_SNPs	i29527Gh	D10	12227707	Gohir.D10G090100
10kb_07vs25_downregulated_SNPs	i45503Gh	D10	32019471	Gohir.D10G144400
10kb_07vs25_downregulated_SNPs	i12199Gh	D10	61699603	Gohir.D10G215500
10kb_07vs25_downregulated_SNPs	i26372Gh	D10	61706179	Gohir.D10G215500
10kb_07vs25_downregulated_SNPs	i32299Gh	D10	62151854	Gohir.D10G218400
10kb_07vs25_downregulated_SNPs	i12244Gh	D10	64921144	Gohir.D10G232500
10kb_07vs25_downregulated_SNPs	i12258Gh	D10	65053872	Gohir.D10G233100
10kb_07vs25_downregulated_SNPs	i12259Gh	D10	65057661	Gohir.D10G233100
10kb_07vs25_downregulated_SNPs	i12285Gh	D10	65989564	Gohir.D10G240500
10kb_07vs25_downregulated_SNPs	i12345Gh	D10	67564742	Gohir.D10G250600
10kb_07vs25_downregulated_SNPs	i40113Gh	D10	67569732	Gohir.D10G250600
10kb_07vs25_downregulated_SNPs	i06696Gh	D11	1020571	Gohir.D11G010900
10kb_07vs25_downregulated_SNPs	i15889Gh	D11	1455827	Gohir.D11G015700
10kb_07vs25_downregulated_SNPs	i15890Gh	D11	1455926	Gohir.D11G015700
10kb_07vs25_downregulated_SNPs	i06739Gh	D11	1744318	Gohir.D11G019300
10kb_07vs25_downregulated_SNPs	i14082Gh	D11	1746806	Gohir.D11G019300
10kb_07vs25_downregulated_SNPs	i06791Gh	D11	2383662	Gohir.D11G027300
10kb_07vs25_downregulated_SNPs	i06827Gh	D11	3374707	Gohir.D11G039900
10kb_07vs25_downregulated_SNPs	i00316Gh	D11	3842315	Gohir.D11G045700
10kb_07vs25_downregulated_SNPs	i06884Gh	D11	4889802	Gohir.D11G056300
10kb_07vs25_downregulated_SNPs	i06885Gh	D11	4891230	Gohir.D11G056300
10kb_07vs25_downregulated_SNPs	i06886Gh	D11	4891818	Gohir.D11G056300
10kb_07vs25_downregulated_SNPs	i06890Gh	D11	5260617	Gohir.D11G060300
10kb_07vs25_downregulated_SNPs	i28505Gh	D11	5271651	Gohir.D11G060300
10kb_07vs25_downregulated_SNPs	i06898Gh	D11	5449992	Gohir.D11G062200
10kb_07vs25_downregulated_SNPs	i06910Gh	D11	5572907	Gohir.D11G063600
10kb_07vs25_downregulated_SNPs	i47034Gh	D11	5935514	Gohir.D11G069100
10kb_07vs25_downregulated_SNPs	i15946Gh	D11	6568613	Gohir.D11G076500
10kb_07vs25_downregulated_SNPs	i15948Gh	D11	6602677	Gohir.D11G076900
10kb_07vs25_downregulated_SNPs	i06970Gh	D11	6703731	Gohir.D11G078000
10kb_07vs25_downregulated_SNPs	i19287Gh	D11	7138094	Gohir.D11G082800
10kb_07vs25_downregulated_SNPs	i07094Gh	D11	12384847	Gohir.D11G126900
10kb_07vs25_downregulated_SNPs	i07101Gh	D11	12729925	Gohir.D11G130000
10kb_07vs25_downregulated_SNPs	i07106Gh	D11	12986500	Gohir.D11G131800
10kb_07vs25_downregulated_SNPs	i07195Gh	D11	15467534	Gohir.D11G151500
10kb_07vs25_downregulated_SNPs	i07196Gh	D11	15467694	Gohir.D11G151500
10kb_07vs25_downregulated_SNPs	i50294Gb	D11	18372796	Gohir.D11G168600
10kb_07vs25_downregulated_SNPs	i38909Gh	D11	19506604	Gohir.D11G174300
10kb_07vs25_downregulated_SNPs	i11444Gh	D11	19512465	Gohir.D11G174300
10kb_07vs25_downregulated_SNPs	i33839Gh	D11	57770382	Gohir.D11G258700
10kb_07vs25_downregulated_SNPs	i07475Gh	D11	60031818	Gohir.D11G267700
10kb_07vs25_downregulated_SNPs	i07536Gh	D11	62870564	Gohir.D11G284400
10kb_07vs25_downregulated_SNPs	i16173Gh	D11	69818360	Gohir.D11G320400
10kb_07vs25_downregulated_SNPs	i07703Gh	D11	71493999	Gohir.D11G331000
10kb_07vs25_downregulated_SNPs	i31641Gh	D12	45624868	Gohir.D12G136600
10kb_07vs25_downregulated_SNPs	i14130Gh	D12	51402773	Gohir.D12G166800
10kb_07vs25_downregulated_SNPs	i42039Gh	D12	51411160	Gohir.D12G166800
10kb_07vs25_downregulated_SNPs	i47331Gh	D12	51413074	Gohir.D12G166800
10kb_07vs25_downregulated_SNPs	i32816Gh	D12	51698476	Gohir.D12G168800
10kb_07vs25_downregulated_SNPs	i08309Gh	D12	52867633	Gohir.D12G176800
10kb_07vs25_downregulated_SNPs	i08310Gh	D12	52869343	Gohir.D12G176800
10kb_07vs25_downregulated_SNPs	i08343Gh	D12	54145051	Gohir.D12G184800
10kb_07vs25_downregulated_SNPs	i08360Gh	D12	54640247	Gohir.D12G188500
10kb_07vs25_downregulated_SNPs	i08370Gh	D12	54814101	Gohir.D12G190100
10kb_07vs25_downregulated_SNPs	i16398Gh	D12	54924383	Gohir.D12G191100
10kb_07vs25_downregulated_SNPs	i16399Gh	D12	54925777	Gohir.D12G191100
10kb_07vs25_downregulated_SNPs	i08471Gh	D12	56785961	Gohir.D12G207100
10kb_07vs25_downregulated_SNPs	i08562Gh	D12	58965020	Gohir.D12G226900
10kb_07vs25_downregulated_SNPs	i08567Gh	D12	59005109	Gohir.D12G227500
10kb_07vs25_downregulated_SNPs	i08573Gh	D12	59099608	Gohir.D12G228500
10kb_07vs25_downregulated_SNPs	i45546Gh	D12	59301091	Gohir.D12G231200
10kb_07vs25_downregulated_SNPs	i08618Gh	D12	60148301	Gohir.D12G238400
10kb_07vs25_downregulated_SNPs	i08659Gh	D12	60967587	Gohir.D12G247500
10kb_07vs25_downregulated_SNPs	i08676Gh	D12	61208599	Gohir.D12G250100
10kb_07vs25_downregulated_SNPs	i12952Gh	D13	77790	Gohir.D13G000800
10kb_07vs25_downregulated_SNPs	i12953Gh	D13	82616	Gohir.D13G000800
10kb_07vs25_downregulated_SNPs	i20230Gh	D13	96166	Gohir.D13G000800
10kb_07vs25_downregulated_SNPs	i12958Gh	D13	214285	Gohir.D13G002200
10kb_07vs25_downregulated_SNPs	i12960Gh	D13	217409	Gohir.D13G002200
10kb_07vs25_downregulated_SNPs	i12984Gh	D13	825751	Gohir.D13G008700
10kb_07vs25_downregulated_SNPs	i12999Gh	D13	1413989	Gohir.D13G014900
10kb_07vs25_downregulated_SNPs	i13018Gh	D13	1686815	Gohir.D13G018300
10kb_07vs25_downregulated_SNPs	i13037Gh	D13	2295560	Gohir.D13G022100
10kb_07vs25_downregulated_SNPs	i13051Gh	D13	2509749	Gohir.D13G023800
10kb_07vs25_downregulated_SNPs	i13052Gh	D13	2510857	Gohir.D13G023800
10kb_07vs25_downregulated_SNPs	i00188Gh	D13	2523228	Gohir.D13G024000
10kb_07vs25_downregulated_SNPs	i13054Gh	D13	2529377	Gohir.D13G024000
10kb_07vs25_downregulated_SNPs	i13055Gh	D13	2529756	Gohir.D13G024000
10kb_07vs25_downregulated_SNPs	i13118Gh	D13	4321058	Gohir.D13G037800
10kb_07vs25_downregulated_SNPs	i13119Gh	D13	4408411	Gohir.D13G038000
10kb_07vs25_downregulated_SNPs	i13283Gh	D13	32618951	Gohir.D13G103100
10kb_07vs25_downregulated_SNPs	i37263Gh	D13	48198805	Gohir.D13G137500
10kb_07vs25_downregulated_SNPs	i33564Gh	D13	49405262	Gohir.D13G140100
10kb_07vs25_downregulated_SNPs	i35011Gh	D13	52286692	Gohir.D13G152600
10kb_07vs25_downregulated_SNPs	i20351Gh	D13	55791089	Gohir.D13G166500
10kb_07vs25_downregulated_SNPs	i18044Gh	D13	55803413	Gohir.D13G166500
10kb_07vs25_downregulated_SNPs	i21027Gh	D13	56096733	Gohir.D13G167600
10kb_07vs25_downregulated_SNPs	i13588Gh	D13	56580342	Gohir.D13G170700
10kb_07vs25_downregulated_SNPs	i13589Gh	D13	56600241	Gohir.D13G170700
10kb_07vs25_downregulated_SNPs	i13598Gh	D13	56849162	Gohir.D13G171800
10kb_07vs25_downregulated_SNPs	i13599Gh	D13	56850802	Gohir.D13G171800
10kb_07vs25_downregulated_SNPs	i13602Gh	D13	56867705	Gohir.D13G171800
10kb_07vs25_downregulated_SNPs	i29846Gh	D13	57193155	Gohir.D13G174000
10kb_07vs25_downregulated_SNPs	i13687Gh	D13	59568525	Gohir.D13G193200
10kb_07vs25_downregulated_SNPs	i37739Gh	D13	60507709	Gohir.D13G201500
10kb_07vs25_downregulated_SNPs	i13715Gh	D13	60519437	Gohir.D13G201500
10kb_07vs25_downregulated_SNPs	i26955Gh	D13	61921062	Gohir.D13G210900
10kb_07vs25_downregulated_SNPs	i13804Gh	D13	62473608	Gohir.D13G216300
10kb_07vs25_downregulated_SNPs	i13805Gh	D13	62493270	Gohir.D13G216400
10kb_07vs25_downregulated_SNPs	i13807Gh	D13	62498995	Gohir.D13G216400
10kb_07vs25_downregulated_SNPs	i13825Gh	D13	62705531	Gohir.D13G218400
10kb_07vs25_downregulated_SNPs	i18145Gh	D13	62713170	Gohir.D13G218400
10kb_07vs25_downregulated_SNPs	i13827Gh	D13	62713892	Gohir.D13G218400
10kb_07vs25_downregulated_SNPs	i13829Gh	D13	62720382	Gohir.D13G218400
10kb_07vs25_downregulated_SNPs	i13845Gh	D13	62881371	Gohir.D13G220600
10kb_07vs25_downregulated_SNPs	i13846Gh	D13	62882036	Gohir.D13G220600
10kb_07vs25_downregulated_SNPs	i13847Gh	D13	62882415	Gohir.D13G220600
10kb_07vs25_downregulated_SNPs	i13861Gh	D13	63106396	Gohir.D13G222700
10kb_07vs25_downregulated_SNPs	i13884Gh	D13	63296197	Gohir.D13G225300
10kb_07vs25_downregulated_SNPs	i18161Gh	D13	63297211	Gohir.D13G225300
10kb_07vs25_downregulated_SNPs	i13885Gh	D13	63297416	Gohir.D13G225300
